# Supplementary material for: Groundwater level forecasting with artificial neural networks: a comparison of long short-term memory (LSTM), convolutional neural networks (CNNs), and non-linear autoregressive networks with exogenous input (NARX)
Source: Copernicus journal article supplement (doi:10.5194/hess-25-1671-2021), 2021-04-01
Supplement: Supplementary file [file hess-25-1671-2021-supplement.pdf]

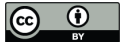

*Supplement of*

**Groundwater level forecasting with artificial neural networks:  
a comparison of long short-term memory (LSTM),  
convolutional neural networks (CNNs), and non-linear  
autoregressive networks with exogenous input (NARX)**

**Andreas Wunsch et al.**

*Correspondence to:* Andreas Wunsch ([andreas.wunsch@kit.edu](mailto:andreas.wunsch@kit.edu))

The copyright of individual parts of the supplement might differ from the article licence.

# Supplementary Material

## Content Overview:

- Table S1 lists all hydrographs including information such as identifiers and coordinates
- Tables S2 to S4 summarize the results of the hyperparameter optimization for all models
- Tables S5 and S6 give information on the forecast accuracy of all models
- Fig. S1 to S34: Seq2Val Results
- Fig. S35 to S68: Seq2Seq Results
- Figure S69 explores the robustness of the models in terms of ensemble error variance
- Figures S70 to S72 give further details on how the length of the training data set influences the seq2val model performance. Figure S73 examines the same effect when training ends even 5 years earlier and Fig. S74 examines the development of several statistic measures in a comparable set up
- Figures S72 to S141 show the training and early stopping loss (MSE) convergence for each of the ten random initializations of the models.

## List of Tables

|    |                                |    |
|----|--------------------------------|----|
| S1 | List of all wells . . . . .    | 5  |
| S2 | NARX Hyperparameters . . . . . | 6  |
| S3 | LSTM Hyperparameters . . . . . | 7  |
| S4 | CNN Hyperparameters . . . . .  | 8  |
| S5 | Seq2Val Results . . . . .      | 9  |
| S6 | Seq2Seq Results . . . . .      | 10 |



## List of Figures

|     |                                                                   |    |
|-----|-------------------------------------------------------------------|----|
| S1  | Seq2Val test results for well BW_1-115-8 . . . . .                | 11 |
| S2  | Seq2Val test results for well BW_103-261-4 . . . . .              | 12 |
| S3  | Seq2Val test results for well BW_104-114-5 . . . . .              | 13 |
| S4  | Seq2Val test results for well BW_104-307-0 . . . . .              | 14 |
| S5  | Seq2Val test results for well BW_138-019-0 . . . . .              | 15 |
| S6  | Seq2Val test results for well BW_157-260-8 . . . . .              | 16 |
| S7  | Seq2Val test results for well BW_710-256-3 . . . . .              | 17 |
| S8  | Seq2Val test results for well BW_765-306-3 . . . . .              | 18 |
| S9  | Seq2Val test results for well BW_781-304-2 . . . . .              | 19 |
| S10 | Seq2Val test results for well BW_1851-305-1 . . . . .             | 20 |
| S11 | Seq2Val test results for well HE_11874 . . . . .                  | 21 |
| S12 | Seq2Val test results for well HE_12905 . . . . .                  | 22 |
| S13 | Seq2Val test results for well HE_12946 . . . . .                  | 23 |
| S14 | Seq2Val test results for well HE_13490 . . . . .                  | 24 |
| S15 | Seq2Val test results for well HE_13518 . . . . .                  | 25 |
| S16 | Seq2Val test results for well RP_2375118200 . . . . .             | 26 |
| S17 | Seq2Val test results for well RP_2375283300 . . . . .             | 27 |
| S18 | Seq2Val $GWL_{t-1}$ test results for well BW_1-115-8 . . . . .    | 28 |
| S19 | Seq2Val $GWL_{t-1}$ test results for well BW_103-261-4 . . . . .  | 29 |
| S20 | Seq2Val $GWL_{t-1}$ test results for well BW_104-114-5 . . . . .  | 30 |
| S21 | Seq2Val $GWL_{t-1}$ test results for well BW_104-307-0 . . . . .  | 31 |
| S22 | Seq2Val $GWL_{t-1}$ test results for well BW_138-019-0 . . . . .  | 32 |
| S23 | Seq2Val $GWL_{t-1}$ test results for well BW_157-260-8 . . . . .  | 33 |
| S24 | Seq2Val $GWL_{t-1}$ test results for well BW_710-256-3 . . . . .  | 34 |
| S25 | Seq2Val $GWL_{t-1}$ test results for well BW_765-306-3 . . . . .  | 35 |
| S26 | Seq2Val $GWL_{t-1}$ test results for well BW_781-304-2 . . . . .  | 36 |
| S27 | Seq2Val $GWL_{t-1}$ test results for well BW_1851-305-1 . . . . . | 37 |
| S28 | Seq2Val $GWL_{t-1}$ test results for well HE_11874 . . . . .      | 38 |
| S29 | Seq2Val $GWL_{t-1}$ test results for well HE_12905 . . . . .      | 39 |
| S30 | Seq2Val $GWL_{t-1}$ test results for well HE_12946 . . . . .      | 40 |
| S31 | Seq2Val $GWL_{t-1}$ test results for well HE_13490 . . . . .      | 41 |
| S32 | Seq2Val $GWL_{t-1}$ test results for well HE_13518 . . . . .      | 42 |
| S33 | Seq2Val $GWL_{t-1}$ test results for well RP_2375118200 . . . . . | 43 |
| S34 | Seq2Val $GWL_{t-1}$ test results for well RP_2375283300 . . . . . | 44 |
| S35 | Seq2Seq test results for well BW_1-115-8 . . . . .                | 45 |
| S36 | Seq2Seq test results for well BW_103-261-4 . . . . .              | 46 |
| S37 | Seq2Seq test results for well BW_104-114-5 . . . . .              | 47 |
| S38 | Seq2Seq test results for well BW_104-307-0 . . . . .              | 48 |
| S39 | Seq2Seq test results for well BW_138-019-0 . . . . .              | 49 |
| S40 | Seq2Seq test results for well BW_157-260-8 . . . . .              | 50 |
| S41 | Seq2Seq test results for well BW_710-256-3 . . . . .              | 51 |
| S42 | Seq2Seq test results for well BW_765-306-3 . . . . .              | 52 |

|     |                                                                             |    |
|-----|-----------------------------------------------------------------------------|----|
| S43 | Seq2Seq test results for well BW_781-304-2                                  | 53 |
| S44 | Seq2Seq test results for well BW_1851-305-1                                 | 54 |
| S45 | Seq2Seq test results for well HE_11874                                      | 55 |
| S46 | Seq2Seq test results for well HE_12905                                      | 56 |
| S47 | Seq2Seq test results for well HE_12946                                      | 57 |
| S48 | Seq2Seq test results for well HE_13490                                      | 58 |
| S49 | Seq2Seq test results for well HE_13518                                      | 59 |
| S50 | Seq2Seq test results for well RP_2375118200                                 | 60 |
| S51 | Seq2Seq test results for well RP_2375283300                                 | 61 |
| S52 | Seq2Seq $GWL_{t-1}$ test results for well BW_1-115-8                        | 62 |
| S53 | Seq2Seq $GWL_{t-1}$ test results for well BW_103-261-4                      | 63 |
| S54 | Seq2Seq $GWL_{t-1}$ test results for well BW_104-114-5                      | 64 |
| S55 | Seq2Seq $GWL_{t-1}$ test results for well BW_104-307-0                      | 65 |
| S56 | Seq2Seq $GWL_{t-1}$ test results for well BW_138-019-0                      | 66 |
| S57 | Seq2Seq $GWL_{t-1}$ test results for well BW_157-260-8                      | 67 |
| S58 | Seq2Seq $GWL_{t-1}$ test results for well BW_710-256-3                      | 68 |
| S59 | Seq2Seq $GWL_{t-1}$ test results for well BW_765-306-3                      | 69 |
| S60 | Seq2Seq $GWL_{t-1}$ test results for well BW_781-304-2                      | 70 |
| S61 | Seq2Seq $GWL_{t-1}$ test results for well BW_1851-305-1                     | 71 |
| S62 | Seq2Seq $GWL_{t-1}$ test results for well HE_11874                          | 72 |
| S63 | Seq2Seq $GWL_{t-1}$ test results for well HE_12905                          | 73 |
| S64 | Seq2Seq $GWL_{t-1}$ test results for well HE_12946                          | 74 |
| S65 | Seq2Seq $GWL_{t-1}$ test results for well HE_13490                          | 75 |
| S66 | Seq2Seq $GWL_{t-1}$ test results for well HE_13518                          | 76 |
| S67 | Seq2Seq $GWL_{t-1}$ test results for well RP_2375118200                     | 77 |
| S68 | Seq2Seq $GWL_{t-1}$ test results for well RP_2375283300                     | 78 |
| S69 | Model Robustness                                                            | 79 |
| S70 | Influence of time series length on Seq2Val Models                           | 80 |
| S71 | Influence of time series length on Seq2Val $GWL_{t-1}$ Models               | 80 |
| S72 | Influence of time series length on all Seq2Val Models with shorter training | 81 |
| S73 | Influence of time series length on statistic measures                       | 81 |
| S74 | Seq2Val Loss BW_1-115-8                                                     | 82 |
| S75 | Seq2Val Loss BW_103-261-4                                                   | 83 |
| S76 | Seq2Val Loss BW_104-114-5                                                   | 84 |
| S77 | Seq2Val Loss BW_104-307-0                                                   | 85 |
| S78 | Seq2Val Loss BW_138-019-0                                                   | 86 |
| S79 | Seq2Val Loss BW_157-260-8                                                   | 87 |
| S80 | Seq2Val Loss BW_710-256-3                                                   | 88 |
| S81 | Seq2Val Loss BW_765-306-3                                                   | 89 |
| S82 | Seq2Val Loss BW_781-304-2                                                   | 90 |
| S83 | Seq2Val Loss BW_1851-305-1                                                  | 91 |
| S84 | Seq2Val Loss HE_11874                                                       | 92 |
| S85 | Seq2Val Loss HE_12905                                                       | 93 |
| S86 | Seq2Val Loss HE_12946                                                       | 94 |

|      |                                        |     |
|------|----------------------------------------|-----|
| S87  | Seq2Val Loss HE_13490                  | 95  |
| S88  | Seq2Val Loss HE_13518                  | 96  |
| S89  | Seq2Val Loss RP_2375118200             | 97  |
| S90  | Seq2Val Loss RP_2375283300             | 98  |
| S91  | Seq2Val $GWL_{t-1}$ Loss BW_1-115-8    | 99  |
| S92  | Seq2Val $GWL_{t-1}$ Loss BW_103-261-4  | 100 |
| S93  | Seq2Val $GWL_{t-1}$ Loss BW_104-114-5  | 101 |
| S94  | Seq2Val $GWL_{t-1}$ Loss BW_104-307-0  | 102 |
| S95  | Seq2Val $GWL_{t-1}$ Loss BW_138-019-0  | 103 |
| S96  | Seq2Val $GWL_{t-1}$ Loss BW_157-260-8  | 104 |
| S97  | Seq2Val $GWL_{t-1}$ Loss BW_710-256-3  | 105 |
| S98  | Seq2Val $GWL_{t-1}$ Loss BW_765-306-3  | 106 |
| S99  | Seq2Val $GWL_{t-1}$ Loss BW_781-304-2  | 107 |
| S100 | Seq2Val $GWL_{t-1}$ Loss BW_1851-305-1 | 108 |
| S101 | Seq2Val $GWL_{t-1}$ Loss HE_11874      | 109 |
| S102 | Seq2Val $GWL_{t-1}$ Loss HE_12905      | 110 |
| S103 | Seq2Val $GWL_{t-1}$ Loss HE_12946      | 111 |
| S104 | Seq2Val $GWL_{t-1}$ Loss HE_13490      | 112 |
| S105 | Seq2Val $GWL_{t-1}$ Loss HE_13518      | 113 |
| S106 | Seq2Val $GWL_{t-1}$ Loss RP_2375118200 | 114 |
| S107 | Seq2Val $GWL_{t-1}$ Loss RP_2375283300 | 115 |
| S108 | Seq2Seq Loss BW_1-115-8                | 116 |
| S109 | Seq2Seq Loss BW_103-261-4              | 117 |
| S110 | Seq2Seq Loss BW_104-114-5              | 118 |
| S111 | Seq2Seq Loss BW_104-307-0              | 119 |
| S112 | Seq2Seq Loss BW_138-019-0              | 120 |
| S113 | Seq2Seq Loss BW_157-260-8              | 121 |
| S114 | Seq2Seq Loss BW_710-256-3              | 122 |
| S115 | Seq2Seq Loss BW_765-306-3              | 123 |
| S116 | Seq2Seq Loss BW_781-304-2              | 124 |
| S117 | Seq2Seq Loss BW_1851-305-1             | 125 |
| S118 | Seq2Seq Loss HE_11874                  | 126 |
| S119 | Seq2Seq Loss HE_12905                  | 127 |
| S120 | Seq2Seq Loss HE_12946                  | 128 |
| S121 | Seq2Seq Loss HE_13490                  | 129 |
| S122 | Seq2Seq Loss HE_13518                  | 130 |
| S123 | Seq2Seq Loss RP_2375118200             | 131 |
| S124 | Seq2Seq Loss RP_2375283300             | 132 |
| S125 | Seq2Seq $GWL_{t-1}$ Loss BW_1-115-8    | 133 |
| S126 | Seq2Seq $GWL_{t-1}$ Loss BW_103-261-4  | 134 |
| S127 | Seq2Seq $GWL_{t-1}$ Loss BW_104-114-5  | 135 |
| S128 | Seq2Seq $GWL_{t-1}$ Loss BW_104-307-0  | 136 |
| S129 | Seq2Seq $GWL_{t-1}$ Loss BW_138-019-0  | 137 |
| S130 | Seq2Seq $GWL_{t-1}$ Loss BW_157-260-8  | 138 |

|                                                    |     |
|----------------------------------------------------|-----|
| S131 Seq2Seq GWL <sub>t-1</sub> Loss BW_710-256-3  | 139 |
| S132 Seq2Seq GWL <sub>t-1</sub> Loss BW_765-306-3  | 140 |
| S133 Seq2Seq GWL <sub>t-1</sub> Loss BW_781-304-2  | 141 |
| S134 Seq2Seq GWL <sub>t-1</sub> Loss BW_1851-305-1 | 142 |
| S135 Seq2Seq GWL <sub>t-1</sub> Loss HE_11874      | 143 |
| S136 Seq2Seq GWL <sub>t-1</sub> Loss HE_12905      | 144 |
| S137 Seq2Seq GWL <sub>t-1</sub> Loss HE_12946      | 145 |
| S138 Seq2Seq GWL <sub>t-1</sub> Loss HE_13490      | 146 |
| S139 Seq2Seq GWL <sub>t-1</sub> Loss HE_13518      | 147 |
| S140 Seq2Seq GWL <sub>t-1</sub> Loss RP_2375118200 | 148 |
| S141 Seq2Seq GWL <sub>t-1</sub> Loss RP_2375283300 | 149 |

Table S1: List of all wells included in the dataset. ID refers to the respective data web service.

| Dataset_ID    | ID         | Name                         | X      | Y       | Coord.Sys.             | Country |
|---------------|------------|------------------------------|--------|---------|------------------------|---------|
| BW_1-115-8    | 1/115-8    | 1115 SCHUTTERWALD            | 416098 | 5369591 | ETRS_1989_UTM_Zone_32N | Germany |
| BW_103-261-4  | 103/261-4  | MALSCH                       | 452062 | 5415349 | ETRS_1989_UTM_Zone_32N | Germany |
| BW_104-114-5  | 104/114-5  | 1807 RENCHEN 1               | 425124 | 5383055 | ETRS_1989_UTM_Zone_32N | Germany |
| BW_104-307-0  | 104/307-0  | GWM SK 22 - 3021A, Rellingen | 468049 | 5458156 | ETRS_1989_UTM_Zone_32N | Germany |
| BW_138-019-0  | 138/019-0  | FLB 5 Breisach-Hochstetten   | 396354 | 5319363 | ETRS_1989_UTM_Zone_32N | Germany |
| BW_157-260-8  | 157/260-8  | 1555 BRUCHHAUSEN             | 453043 | 5418954 | ETRS_1989_UTM_Zone_32N | Germany |
| BW_1851-305-1 | 1851/305-1 | GWM 1 TIEF, DOSSENHEIM       | 473896 | 5477008 | ETRS_1989_UTM_Zone_32N | Germany |
| BW_710-256-3  | 710/256-3  | ALTLUSSHEIM M                | 463216 | 5461626 | ETRS_1989_UTM_Zone_32N | Germany |
| BW_765-306-3  | 765/306-3  | KETSCH SCHLEIWIESTE T        | 463711 | 5467331 | ETRS_1989_UTM_Zone_32N | Germany |
| BW_781-304-2  | 781/304-2  | GWM Tief, Heddeshheim        | 473915 | 5486080 | ETRS_1989_UTM_Zone_32N | Germany |
| HE_11874      | 11874      | RUESSELSHEIM                 | 462420 | 5537724 | ETRS_1989_UTM_Zone_32N | Germany |
| HE_12905      | 12905      | GROSS-ROHRHEIM               | 461300 | 5508386 | ETRS_1989_UTM_Zone_32N | Germany |
| HE_12946      | 12946      | FEHLHEIM                     | 468827 | 5505887 | ETRS_1989_UTM_Zone_32N | Germany |
| HE_13490      | 13490      | HOFHEIM                      | 458537 | 5500283 | ETRS_1989_UTM_Zone_32N | Germany |
| HE_13518      | 13518      | LAMPERTHEIM                  | 468337 | 5494261 | ETRS_1989_UTM_Zone_32N | Germany |
| RP_2375118200 | 2375118200 | 1174 II Neupotz              | 451064 | 5439203 | ETRS_1989_UTM_Zone_32N | Germany |
| RP_2375283300 | 2375283300 | 1273 III Leimersheim         | 452633 | 5439833 | ETRS_1989_UTM_Zone_32N | Germany |

Table S2: Results of bayesian hyperparameter optimization (NARX models).

| NARX                       |               | Inputs |   |      | Model Parameters |      |       |      |         |                       |    |
|----------------------------|---------------|--------|---|------|------------------|------|-------|------|---------|-----------------------|----|
|                            |               | rH     | T | Tsin | Hidden size      | ID P | ID rH | ID T | ID Tsin | ID GWL <sub>L-1</sub> | FD |
| seq2val                    | BW_1-115-8    | 0      | 1 | 1    | 1                | 52   | -     | 3    | 29      | -                     | 47 |
|                            | BW_103-261-4  | 1      | 1 | 0    | 18               | 12   | 3     | 52   | -       | -                     | 39 |
|                            | BW_104-114-5  | 0      | 1 | 1    | 14               | 8    | -     | 50   | 4       | -                     | 36 |
|                            | BW_104-307-0  | 0      | 1 | 1    | 20               | 50   | -     | 52   | 51      | -                     | 11 |
|                            | BW_138-019-0  | 0      | 0 | 1    | 19               | 24   | -     | -    | 50      | -                     | 50 |
|                            | BW_157-260-8  | 1      | 1 | 0    | 14               | 21   | 52    | 52   | -       | -                     | 23 |
|                            | BW_1851-305-1 | 1      | 1 | 1    | 10               | 40   | 12    | 34   | 13      | -                     | 34 |
|                            | BW_710-256-3  | 0      | 0 | 1    | 18               | 12   | -     | -    | 46      | -                     | 9  |
|                            | BW_765-306-3  | 1      | 0 | 1    | 17               | 18   | 51    | -    | 46      | -                     | 33 |
|                            | BW_781-304-2  | 1      | 1 | 0    | 10               | 41   | 40    | 52   | -       | -                     | 38 |
|                            | HE_11874      | 0      | 0 | 1    | 18               | 37   | -     | -    | 49      | -                     | 47 |
|                            | HE_12905      | 1      | 0 | 1    | 9                | 5    | 2     | -    | 17      | -                     | 4  |
|                            | HE_12946      | 1      | 0 | 0    | 7                | 44   | 47    | -    | -       | -                     | 45 |
|                            | HE_13490      | 1      | 0 | 0    | 17               | 48   | 48    | -    | -       | -                     | 21 |
|                            | HE_13518      | 1      | 0 | 0    | 20               | 52   | 32    | -    | -       | -                     | 10 |
|                            | RP_2375118200 | 1      | 1 | 1    | 12               | 42   | 47    | 35   | 1       | -                     | 26 |
| RP_2375283300              | 1             | 1      | 1 | 8    | 11               | 21   | 47    | 25   | -       | 4                     |    |
| seq2val GWL <sub>L-1</sub> | BW_1-115-8    | 0      | 1 | 0    | 1                | 13   | -     | 19   | -       | 44                    | 8  |
|                            | BW_103-261-4  | 1      | 0 | 0    | 1                | 17   | 19    | -    | -       | 50                    | 8  |
|                            | BW_104-114-5  | 1      | 0 | 1    | 1                | 3    | 44    | -    | 30      | 13                    | 2  |
|                            | BW_104-307-0  | 0      | 0 | 1    | 3                | 28   | -     | -    | 11      | 14                    | 10 |
|                            | BW_138-019-0  | 0      | 1 | 1    | 4                | 2    | -     | 5    | 48      | 8                     | 3  |
|                            | BW_157-260-8  | 0      | 1 | 1    | 1                | 19   | -     | 18   | 7       | 3                     | 1  |
|                            | BW_1851-305-1 | 0      | 1 | 0    | 1                | 12   | -     | 26   | -       | 5                     | 14 |
|                            | BW_710-256-3  | 0      | 0 | 1    | 2                | 3    | -     | -    | 35      | 5                     | 3  |
|                            | BW_765-306-3  | 0      | 0 | 0    | 3                | 2    | -     | -    | -       | 45                    | 2  |
|                            | BW_781-304-2  | 1      | 1 | 0    | 3                | 6    | 8     | 10   | -       | 28                    | 4  |
|                            | HE_11874      | 0      | 1 | 1    | 4                | 4    | -     | 13   | 32      | 51                    | 11 |
|                            | HE_12905      | 1      | 1 | 0    | 1                | 18   | 7     | 21   | -       | 30                    | 1  |
|                            | HE_12946      | 1      | 0 | 0    | 1                | 2    | 16    | -    | -       | 3                     | 12 |
|                            | HE_13490      | 0      | 1 | 1    | 8                | 3    | -     | 6    | 44      | 28                    | 1  |
|                            | HE_13518      | 1      | 1 | 1    | 1                | 4    | 22    | 10   | 14      | 1                     | 9  |
|                            | RP_2375118200 | 0      | 1 | 1    | 7                | 7    | -     | 28   | 38      | 7                     | 8  |
| RP_2375283300              | 0             | 0      | 1 | 2    | 3                | -    | -     | 35   | 5       | 3                     |    |
| seq2seq                    | BW_1-115-8    | 0      | 1 | 0    | 1                | 2    | -     | 9    | -       | -                     | 8  |
|                            | BW_103-261-4  | 0      | 1 | 1    | 17               | 1    | -     | 1    | 4       | -                     | 3  |
|                            | BW_104-114-5  | 0      | 1 | 1    | 1                | 4    | -     | 8    | 8       | -                     | 4  |
|                            | BW_104-307-0  | 1      | 0 | 0    | 17               | 11   | 11    | -    | -       | -                     | 5  |
|                            | BW_138-019-0  | 0      | 0 | 0    | 1                | 8    | -     | -    | -       | -                     | 2  |
|                            | BW_157-260-8  | 1      | 1 | 0    | 20               | 10   | 2     | 1    | -       | -                     | 3  |
|                            | BW_1851-305-1 | 0      | 0 | 0    | 10               | 11   | -     | -    | -       | -                     | 7  |
|                            | BW_710-256-3  | 1      | 0 | 0    | 20               | 12   | 4     | -    | -       | -                     | 1  |
|                            | BW_765-306-3  | 0      | 0 | 1    | 20               | 4    | -     | -    | 7       | -                     | 3  |
|                            | BW_781-304-2  | 1      | 0 | 0    | 17               | 11   | 11    | -    | -       | -                     | 5  |
|                            | HE_11874      | 1      | 1 | 1    | 8                | 10   | 8     | 12   | 5       | -                     | 12 |
|                            | HE_12905      | 1      | 1 | 0    | 12               | 6    | 6     | 1    | -       | -                     | 8  |
|                            | HE_12946      | 1      | 0 | 0    | 20               | 12   | 7     | -    | -       | -                     | 5  |
|                            | HE_13490      | 1      | 1 | 0    | 3                | 4    | 4     | 1    | -       | -                     | 3  |
|                            | HE_13518      | 1      | 1 | 0    | 18               | 10   | 7     | 12   | -       | -                     | 12 |
|                            | RP_2375118200 | 1      | 1 | 1    | 2                | 10   | 11    | 4    | 12      | -                     | 12 |
| RP_2375283300              | 1             | 0      | 0 | 4    | 8                | 4    | -     | -    | -       | 3                     |    |
| seq2seq GWL <sub>L-1</sub> | BW_1-115-8    | 0      | 1 | 1    | 1                | 3    | -     | 12   | 1       | 11                    | 8  |
|                            | BW_103-261-4  | 1      | 0 | 1    | 7                | 6    | 11    | -    | 3       | 8                     | 2  |
|                            | BW_104-114-5  | 1      | 1 | 1    | 2                | 6    | 2     | 12   | 3       | 11                    | 6  |
|                            | BW_104-307-0  | 0      | 1 | 0    | 19               | 12   | -     | 1    | -       | 12                    | 2  |
|                            | BW_138-019-0  | 1      | 0 | 0    | 8                | 9    | 2     | -    | -       | 2                     | 6  |
|                            | BW_157-260-8  | 1      | 1 | 1    | 2                | 2    | 3     | 11   | 4       | 1                     | 1  |
|                            | BW_1851-305-1 | 1      | 1 | 0    | 17               | 10   | 10    | 5    | -       | 2                     | 6  |
|                            | BW_710-256-3  | 0      | 1 | 1    | 1                | 3    | -     | 6    | 12      | 3                     | 11 |
|                            | BW_765-306-3  | 0      | 1 | 1    | 5                | 3    | -     | 3    | 7       | 5                     | 9  |
|                            | BW_781-304-2  | 1      | 0 | 0    | 20               | 9    | 3     | -    | -       | 1                     | 7  |
|                            | HE_11874      | 1      | 1 | 1    | 20               | 3    | 10    | 11   | 8       | 10                    | 8  |
|                            | HE_12905      | 0      | 1 | 1    | 4                | 8    | -     | 9    | 7       | 8                     | 9  |
|                            | HE_12946      | 0      | 0 | 0    | 17               | 1    | -     | -    | -       | 11                    | 12 |
|                            | HE_13490      | 1      | 0 | 1    | 6                | 2    | 2     | -    | 12      | 6                     | 9  |
|                            | HE_13518      | 0      | 1 | 1    | 1                | 12   | -     | 1    | 7       | 10                    | 12 |
|                            | RP_2375118200 | 0      | 1 | 0    | 2                | 7    | -     | 11   | -       | 10                    | 2  |
| RP_2375283300              | 1             | 0      | 0 | 1    | 12               | 6    | -     | -    | 2       | 1                     |    |

Table S3: Results of bayesian hyperparameter optimization (LSTM models).

|                            | LSTM          | Inputs |   |      | Model Parameters |             |            |
|----------------------------|---------------|--------|---|------|------------------|-------------|------------|
|                            |               | rH     | T | Tsin | Hidden size      | Seq. Length | Batch size |
| seq2val                    | BW_1-115-8    | 1      | 0 | 1    | 65               | 40          | 21         |
|                            | BW_103-261-4  | 1      | 0 | 1    | 164              | 23          | 84         |
|                            | BW_104-114-5  | 0      | 1 | 0    | 144              | 35          | 135        |
|                            | BW_104-307-0  | 1      | 0 | 1    | 65               | 40          | 21         |
|                            | BW_138-019-0  | 1      | 0 | 0    | 228              | 19          | 191        |
|                            | BW_157-260-8  | 1      | 0 | 1    | 65               | 40          | 21         |
|                            | BW_1851-305-1 | 1      | 1 | 1    | 218              | 32          | 189        |
|                            | BW_710-256-3  | 1      | 0 | 0    | 82               | 20          | 16         |
|                            | BW_765-306-3  | 1      | 0 | 1    | 95               | 10          | 25         |
|                            | BW_781-304-2  | 1      | 1 | 0    | 60               | 1           | 180        |
|                            | HE_11874      | 1      | 1 | 1    | 201              | 45          | 48         |
|                            | HE_12905      | 0      | 0 | 1    | 113              | 38          | 40         |
|                            | HE_12946      | 1      | 0 | 1    | 65               | 40          | 21         |
|                            | HE_13490      | 1      | 0 | 0    | 79               | 51          | 36         |
|                            | HE_13518      | 1      | 1 | 0    | 229              | 49          | 43         |
|                            | RP_2375118200 | 1      | 0 | 1    | 65               | 40          | 21         |
|                            | RP_2375283300 | 1      | 0 | 1    | 117              | 12          | 41         |
| seq2val GWL <sub>t-1</sub> | BW_1-115-8    | 0      | 0 | 1    | 78               | 10          | 16         |
|                            | BW_103-261-4  | 1      | 1 | 1    | 240              | 2           | 32         |
|                            | BW_104-114-5  | 1      | 1 | 1    | 79               | 14          | 17         |
|                            | BW_104-307-0  | 1      | 1 | 0    | 116              | 35          | 18         |
|                            | BW_138-019-0  | 0      | 1 | 1    | 76               | 2           | 19         |
|                            | BW_157-260-8  | 1      | 1 | 1    | 136              | 1           | 16         |
|                            | BW_1851-305-1 | 0      | 1 | 1    | 124              | 49          | 17         |
|                            | BW_710-256-3  | 0      | 0 | 1    | 78               | 10          | 16         |
|                            | BW_765-306-3  | 0      | 0 | 1    | 81               | 23          | 16         |
|                            | BW_781-304-2  | 0      | 0 | 0    | 175              | 1           | 18         |
|                            | HE_11874      | 1      | 0 | 1    | 183              | 1           | 16         |
|                            | HE_12905      | 0      | 0 | 1    | 7                | 2           | 17         |
|                            | HE_12946      | 0      | 1 | 1    | 196              | 1           | 33         |
|                            | HE_13490      | 1      | 0 | 0    | 171              | 1           | 27         |
|                            | HE_13518      | 1      | 1 | 0    | 39               | 50          | 16         |
|                            | RP_2375118200 | 1      | 0 | 1    | 24               | 50          | 16         |
|                            | RP_2375283300 | 0      | 1 | 0    | 255              | 2           | 16         |
| seq2seq                    | BW_1-115-8    | 0      | 0 | 1    | 78               | 10          | 16         |
|                            | BW_103-261-4  | 0      | 0 | 1    | 115              | 15          | 40         |
|                            | BW_104-114-5  | 1      | 0 | 1    | 65               | 40          | 21         |
|                            | BW_104-307-0  | 1      | 1 | 0    | 229              | 49          | 43         |
|                            | BW_138-019-0  | 0      | 1 | 1    | 108              | 1           | 16         |
|                            | BW_157-260-8  | 0      | 1 | 0    | 206              | 48          | 49         |
|                            | BW_1851-305-1 | 0      | 1 | 1    | 121              | 51          | 19         |
|                            | BW_710-256-3  | 1      | 1 | 0    | 111              | 19          | 29         |
|                            | BW_765-306-3  | 1      | 0 | 1    | 108              | 36          | 39         |
|                            | BW_781-304-2  | 0      | 0 | 0    | 148              | 1           | 178        |
|                            | HE_11874      | 1      | 1 | 0    | 229              | 49          | 43         |
|                            | HE_12905      | 0      | 0 | 1    | 78               | 10          | 16         |
|                            | HE_12946      | 0      | 0 | 1    | 244              | 2           | 51         |
|                            | HE_13490      | 1      | 0 | 1    | 62               | 39          | 18         |
|                            | HE_13518      | 1      | 0 | 1    | 65               | 40          | 21         |
|                            | RP_2375118200 | 0      | 0 | 1    | 106              | 31          | 40         |
|                            | RP_2375283300 | 1      | 0 | 1    | 65               | 1           | 31         |
| seq2seq GWL <sub>t-1</sub> | BW_1-115-8    | 0      | 0 | 0    | 108              | 51          | 25         |
|                            | BW_103-261-4  | 0      | 1 | 1    | 175              | 38          | 16         |
|                            | BW_104-114-5  | 1      | 1 | 0    | 224              | 50          | 16         |
|                            | BW_104-307-0  | 1      | 0 | 1    | 245              | 2           | 30         |
|                            | BW_138-019-0  | 0      | 0 | 1    | 209              | 5           | 17         |
|                            | BW_157-260-8  | 0      | 0 | 1    | 255              | 49          | 20         |
|                            | BW_1851-305-1 | 0      | 0 | 1    | 78               | 10          | 16         |
|                            | BW_710-256-3  | 0      | 1 | 1    | 246              | 26          | 57         |
|                            | BW_765-306-3  | 0      | 0 | 1    | 229              | 50          | 45         |
|                            | BW_781-304-2  | 0      | 0 | 0    | 112              | 5           | 22         |
|                            | HE_11874      | 1      | 1 | 1    | 198              | 1           | 16         |
|                            | HE_12905      | 1      | 0 | 1    | 223              | 2           | 16         |
|                            | HE_12946      | 1      | 1 | 0    | 233              | 8           | 28         |
|                            | HE_13490      | 0      | 0 | 0    | 158              | 47          | 16         |
|                            | HE_13518      | 0      | 0 | 1    | 81               | 23          | 16         |
|                            | RP_2375118200 | 1      | 1 | 0    | 72               | 2           | 16         |
|                            | RP_2375283300 | 1      | 1 | 1    | 221              | 5           | 173        |

Table S4: Results of bayesian hyperparameter optimization (CNN models).

| CNN                        | Inputs        |   |      | Model Parameters |            |             |            |     |
|----------------------------|---------------|---|------|------------------|------------|-------------|------------|-----|
|                            | rH            | T | Tsin | No. of filters   | Dense size | Seq. Length | Batch size |     |
| seq2val                    | BW_1-115-8    | 0 | 0    | 1                | 107        | 109         | 36         | 39  |
|                            | BW_103-261-4  | 1 | 1    | 0                | 48         | 205         | 30         | 71  |
|                            | BW_104-114-5  | 0 | 0    | 1                | 53         | 175         | 35         | 116 |
|                            | BW_104-307-0  | 1 | 0    | 0                | 55         | 184         | 46         | 75  |
|                            | BW_138-019-0  | 0 | 0    | 1                | 200        | 55          | 36         | 51  |
|                            | BW_157-260-8  | 1 | 0    | 1                | 212        | 62          | 31         | 19  |
|                            | BW_1851-305-1 | 0 | 0    | 1                | 80         | 156         | 44         | 26  |
|                            | BW_710-256-3  | 0 | 0    | 1                | 46         | 82          | 21         | 17  |
|                            | BW_765-306-3  | 1 | 0    | 1                | 200        | 250         | 19         | 20  |
|                            | BW_781-304-2  | 1 | 0    | 0                | 220        | 63          | 43         | 22  |
|                            | HE_11874      | 1 | 0    | 0                | 159        | 107         | 48         | 58  |
|                            | HE_12905      | 0 | 0    | 1                | 205        | 51          | 36         | 49  |
|                            | HE_12946      | 1 | 0    | 0                | 226        | 41          | 49         | 108 |
|                            | HE_13490      | 1 | 1    | 0                | 27         | 5           | 50         | 21  |
|                            | HE_13518      | 1 | 0    | 0                | 183        | 69          | 43         | 22  |
|                            | RP_2375118200 | 0 | 0    | 1                | 205        | 51          | 36         | 49  |
|                            | RP_2375283300 | 1 | 0    | 1                | 30         | 79          | 14         | 17  |
| seq2val GWL <sub>L-1</sub> | BW_1-115-8    | 0 | 0    | 1                | 95         | 3           | 1          | 42  |
|                            | BW_103-261-4  | 1 | 0    | 1                | 227        | 232         | 1          | 33  |
|                            | BW_104-114-5  | 0 | 1    | 1                | 115        | 243         | 13         | 43  |
|                            | BW_104-307-0  | 0 | 0    | 1                | 155        | 152         | 11         | 25  |
|                            | BW_138-019-0  | 0 | 0    | 0                | 74         | 173         | 1          | 21  |
|                            | BW_157-260-8  | 0 | 1    | 0                | 248        | 125         | 4          | 16  |
|                            | BW_1851-305-1 | 0 | 0    | 1                | 243        | 177         | 1          | 19  |
|                            | BW_710-256-3  | 0 | 0    | 1                | 123        | 197         | 26         | 16  |
|                            | BW_765-306-3  | 0 | 0    | 1                | 38         | 78          | 18         | 16  |
|                            | BW_781-304-2  | 0 | 1    | 0                | 88         | 111         | 1          | 17  |
|                            | HE_11874      | 1 | 1    | 0                | 172        | 201         | 7          | 16  |
|                            | HE_12905      | 0 | 1    | 0                | 198        | 94          | 2          | 20  |
|                            | HE_12946      | 0 | 0    | 0                | 165        | 206         | 2          | 26  |
|                            | HE_13490      | 0 | 0    | 1                | 237        | 170         | 2          | 18  |
|                            | HE_13518      | 1 | 1    | 1                | 72         | 31          | 1          | 37  |
|                            | RP_2375118200 | 0 | 0    | 1                | 100        | 150         | 5          | 30  |
|                            | RP_2375283300 | 1 | 1    | 0                | 172        | 242         | 2          | 20  |
| seq2seq                    | BW_1-115-8    | 1 | 1    | 0                | 248        | 127         | 29         | 178 |
|                            | BW_103-261-4  | 0 | 0    | 1                | 205        | 51          | 36         | 49  |
|                            | BW_104-114-5  | 0 | 1    | 1                | 194        | 153         | 30         | 154 |
|                            | BW_104-307-0  | 1 | 1    | 1                | 78         | 123         | 34         | 23  |
|                            | BW_138-019-0  | 0 | 0    | 0                | 34         | 161         | 1          | 29  |
|                            | BW_157-260-8  | 0 | 0    | 1                | 205        | 51          | 36         | 49  |
|                            | BW_1851-305-1 | 0 | 1    | 0                | 212        | 51          | 34         | 61  |
|                            | BW_710-256-3  | 1 | 1    | 1                | 78         | 123         | 34         | 23  |
|                            | BW_765-306-3  | 0 | 1    | 0                | 80         | 192         | 38         | 90  |
|                            | BW_781-304-2  | 1 | 0    | 0                | 52         | 2           | 50         | 94  |
|                            | HE_11874      | 1 | 1    | 1                | 78         | 123         | 34         | 23  |
|                            | HE_12905      | 0 | 0    | 1                | 38         | 78          | 18         | 16  |
|                            | HE_12946      | 1 | 1    | 1                | 78         | 123         | 34         | 23  |
|                            | HE_13490      | 1 | 1    | 1                | 78         | 123         | 34         | 23  |
|                            | HE_13518      | 1 | 0    | 0                | 159        | 107         | 48         | 58  |
|                            | RP_2375118200 | 1 | 0    | 1                | 238        | 105         | 19         | 34  |
|                            | RP_2375283300 | 1 | 1    | 1                | 246        | 139         | 2          | 170 |
| seq2seq GWL <sub>L-1</sub> | BW_1-115-8    | 1 | 0    | 1                | 242        | 133         | 10         | 155 |
|                            | BW_103-261-4  | 0 | 1    | 1                | 118        | 255         | 30         | 49  |
|                            | BW_104-114-5  | 0 | 0    | 1                | 112        | 245         | 19         | 44  |
|                            | BW_104-307-0  | 0 | 1    | 1                | 236        | 100         | 18         | 20  |
|                            | BW_138-019-0  | 0 | 0    | 0                | 45         | 142         | 9          | 20  |
|                            | BW_157-260-8  | 0 | 1    | 0                | 212        | 62          | 34         | 77  |
|                            | BW_1851-305-1 | 0 | 0    | 0                | 54         | 174         | 3          | 20  |
|                            | BW_710-256-3  | 1 | 1    | 1                | 244        | 106         | 17         | 31  |
|                            | BW_765-306-3  | 0 | 0    | 1                | 114        | 242         | 18         | 47  |
|                            | BW_781-304-2  | 0 | 0    | 1                | 254        | 87          | 47         | 20  |
|                            | HE_11874      | 1 | 1    | 0                | 255        | 181         | 6          | 19  |
|                            | HE_12905      | 1 | 1    | 0                | 56         | 86          | 21         | 28  |
|                            | HE_12946      | 0 | 0    | 1                | 62         | 213         | 21         | 18  |
|                            | HE_13490      | 0 | 1    | 1                | 243        | 118         | 21         | 33  |
|                            | HE_13518      | 1 | 0    | 1                | 243        | 103         | 9          | 25  |
|                            | RP_2375118200 | 1 | 1    | 0                | 137        | 227         | 2          | 34  |
|                            | RP_2375283300 | 1 | 1    | 1                | 51         | 149         | 2          | 26  |

Table S5: Forecasting results of all sequence-to-value models.

|               |               | Seq2Val    |      |      |       |       |        |         | Seq2Val (GWL <sub>t-1</sub> ) |      |      |       |       |       |       |
|---------------|---------------|------------|------|------|-------|-------|--------|---------|-------------------------------|------|------|-------|-------|-------|-------|
|               | ID            | NSE        | R2   | RMSE | rRMSE | Bias  | rBias  | PI      | NSE                           | R2   | RMSE | rRMSE | Bias  | rBias | PI    |
| NARX          | BW_1-115-8    | 0.68       | 0.83 | 0.17 | 11.85 | -0.13 | -8.86  | -8.55   | 0.86                          | 0.85 | 0.11 | 7.89  | -0.04 | -2.82 | -3.23 |
|               | BW_103-261-4  | 0.67       | 0.77 | 0.21 | 8.45  | -0.13 | -5.24  | -5.42   | 0.93                          | 0.91 | 0.10 | 3.89  | 0.00  | -0.15 | -0.36 |
|               | BW_104-114-5  | 0.84       | 0.87 | 0.17 | 5.80  | -0.08 | -2.58  | -0.33   | 0.89                          | 0.89 | 0.14 | 4.87  | -0.01 | -0.19 | 0.06  |
|               | BW_104-307-0  | -0.68      | 0.71 | 0.25 | 13.88 | -0.23 | -12.55 | -85.04  | 0.96                          | 0.96 | 0.04 | 2.08  | 0.00  | -0.17 | -0.92 |
|               | BW_138-019-0  | 0.06       | 0.13 | 0.11 | 5.46  | -0.05 | -2.58  | -0.81   | 0.41                          | 0.31 | 0.08 | 4.33  | -0.01 | -0.45 | -0.14 |
|               | BW_157-260-8  | 0.78       | 0.90 | 0.13 | 8.11  | 0.11  | 6.45   | -5.86   | 0.96                          | 0.95 | 0.06 | 3.43  | 0.00  | -0.08 | -0.23 |
|               | BW_1851-305-1 | 0.75       | 0.71 | 0.15 | 8.40  | 0.05  | 2.61   | -3.34   | 0.90                          | 0.84 | 0.09 | 5.29  | 0.02  | 1.03  | -0.72 |
|               | BW_710-256-3  | 0.42       | 0.62 | 0.31 | 9.41  | -0.17 | -5.36  | -4.65   | 0.84                          | 0.84 | 0.16 | 4.91  | -0.01 | -0.34 | -0.54 |
|               | BW_765-306-3  | 0.30       | 0.40 | 0.53 | 13.58 | -0.24 | -6.12  | -2.27   | 0.67                          | 0.66 | 0.37 | 9.32  | -0.06 | -1.60 | -0.54 |
|               | BW_781-304-2  | 0.90       | 0.60 | 0.18 | 7.12  | -0.10 | -4.21  | -26.70  | 0.99                          | 0.96 | 0.04 | 1.81  | 0.00  | -0.06 | -0.80 |
|               | HE_11874      | 0.35       | 0.75 | 0.24 | 13.42 | -0.17 | -9.38  | -55.95  | 0.99                          | 0.99 | 0.03 | 1.45  | -0.01 | -0.40 | 0.33  |
|               | HE_12905      | 0.26       | 0.67 | 0.40 | 11.86 | -0.31 | -9.28  | -14.92  | 0.92                          | 0.90 | 0.14 | 4.01  | -0.03 | -0.87 | -0.82 |
|               | HE_12946      | 0.86       | 0.18 | 0.25 | 8.67  | 0.08  | 2.88   | -42.39  | 1.00                          | 0.93 | 0.04 | 1.52  | 0.00  | -0.08 | -0.33 |
|               | HE_13490      | 0.56       | 0.75 | 0.24 | 11.89 | -0.22 | -10.47 | -28.53  | 0.98                          | 0.96 | 0.05 | 2.43  | -0.01 | -0.26 | -0.23 |
|               | HE_13518      | 0.76       | 0.87 | 0.20 | 9.05  | -0.19 | -8.38  | -53.81  | 0.99                          | 0.98 | 0.03 | 1.47  | 0.00  | 0.09  | -0.46 |
|               | RP_2375118200 | 0.55       | 0.78 | 0.17 | 14.45 | -0.15 | -12.17 | -14.48  | 0.95                          | 0.93 | 0.06 | 4.64  | -0.02 | -1.57 | -0.59 |
|               | RP_2375283300 | 0.68       | 0.66 | 0.20 | 9.33  | -0.11 | -5.12  | -1.77   | 0.81                          | 0.74 | 0.16 | 7.27  | -0.06 | -2.56 | -0.68 |
|               | LSTM          | BW_1-115-8 | 0.76 | 0.83 | 0.15  | 10.36 | -0.10  | -6.63   | -6.24                         | 0.87 | 0.86 | 0.11  | 7.63  | -0.04 | -2.48 |
| BW_103-261-4  |               | 0.61       | 0.72 | 0.23 | 9.21  | -0.15 | -6.07  | -6.66   | 0.91                          | 0.89 | 0.11 | 4.32  | -0.01 | -0.44 | -0.69 |
| BW_104-114-5  |               | 0.61       | 0.71 | 0.26 | 9.02  | -0.14 | -4.90  | -2.24   | 0.88                          | 0.88 | 0.15 | 4.96  | -0.01 | -0.35 | 0.02  |
| BW_104-307-0  |               | 0.49       | 0.50 | 0.14 | 7.58  | -0.03 | -1.39  | -24.89  | 0.95                          | 0.95 | 0.04 | 2.34  | -0.01 | -0.61 | -1.48 |
| BW_138-019-0  |               | -0.01      | 0.00 | 0.11 | 5.65  | -0.04 | -2.24  | -0.95   | 0.37                          | 0.29 | 0.09 | 4.47  | -0.02 | -0.78 | -0.22 |
| BW_157-260-8  |               | 0.81       | 0.84 | 0.12 | 7.39  | 0.04  | 2.36   | -4.68   | 0.96                          | 0.95 | 0.06 | 3.54  | 0.00  | 0.08  | -0.30 |
| BW_1851-305-1 |               | -0.13      | 0.15 | 0.32 | 17.93 | 0.24  | 13.56  | -18.79  | 0.90                          | 0.83 | 0.09 | 5.29  | 0.01  | 0.61  | -0.72 |
| BW_710-256-3  |               | 0.48       | 0.57 | 0.29 | 8.94  | -0.12 | -3.67  | -4.00   | 0.78                          | 0.79 | 0.19 | 5.75  | -0.04 | -1.28 | -1.07 |
| BW_765-306-3  |               | 0.41       | 0.42 | 0.49 | 12.56 | -0.15 | -3.74  | -1.78   | 0.67                          | 0.66 | 0.37 | 9.44  | -0.08 | -2.16 | -0.57 |
| BW_781-304-2  |               | 0.11       | 0.00 | 0.53 | 21.24 | -0.48 | -19.48 | -245.79 | 0.99                          | 0.95 | 0.05 | 1.89  | 0.00  | -0.06 | -0.95 |
| HE_11874      |               | 0.45       | 0.49 | 0.22 | 12.31 | 0.05  | 2.62   | -47.10  | 0.98                          | 0.98 | 0.04 | 2.09  | 0.00  | -0.16 | -0.39 |
| HE_12905      |               | 0.20       | 0.62 | 0.41 | 12.27 | -0.32 | -9.54  | -15.66  | 0.88                          | 0.86 | 0.16 | 4.76  | -0.03 | -0.75 | -1.51 |
| HE_12946      |               | 0.46       | 0.52 | 0.49 | 17.02 | -0.44 | -15.06 | -166.68 | 0.99                          | 0.91 | 0.05 | 1.67  | 0.00  | 0.05  | -0.62 |
| HE_13490      |               | -0.33      | 0.62 | 0.42 | 20.58 | -0.40 | -19.35 | -87.98  | 0.98                          | 0.94 | 0.06 | 2.68  | 0.01  | 0.27  | -0.51 |
| HE_13518      |               | 0.33       | 0.36 | 0.34 | 14.99 | -0.29 | -12.74 | -144.04 | 0.99                          | 0.96 | 0.04 | 1.83  | 0.00  | -0.11 | -1.16 |
| RP_2375118200 |               | 0.63       | 0.75 | 0.16 | 13.11 | -0.12 | -10.11 | -11.33  | 0.94                          | 0.91 | 0.07 | 5.47  | -0.03 | -2.40 | -1.14 |
| RP_2375283300 |               | 0.41       | 0.56 | 0.28 | 12.82 | -0.20 | -9.27  | -4.15   | 0.77                          | 0.68 | 0.17 | 8.00  | -0.05 | -2.49 | -1.00 |
| CNN           |               | BW_1-115-8 | 0.61 | 0.75 | 0.19  | 13.05 | -0.13  | -8.83   | -10.48                        | 0.89 | 0.89 | 0.10  | 7.00  | -0.03 | -2.35 |
|               | BW_103-261-4  | 0.65       | 0.72 | 0.22 | 8.72  | -0.12 | -4.73  | -5.88   | 0.92                          | 0.89 | 0.11 | 4.25  | 0.00  | -0.19 | -0.63 |
|               | BW_104-114-5  | 0.72       | 0.75 | 0.22 | 7.62  | -0.07 | -2.43  | -1.32   | 0.89                          | 0.89 | 0.14 | 4.75  | -0.01 | -0.34 | 0.10  |
|               | BW_104-307-0  | 0.61       | 0.69 | 0.12 | 6.67  | 0.06  | 3.14   | -19.07  | 0.95                          | 0.95 | 0.04 | 2.28  | -0.01 | -0.28 | -1.34 |
|               | BW_138-019-0  | -0.10      | 0.03 | 0.11 | 5.88  | -0.06 | -2.96  | -1.11   | 0.36                          | 0.27 | 0.09 | 4.51  | 0.01  | 0.38  | -0.24 |
|               | BW_157-260-8  | 0.83       | 0.84 | 0.11 | 7.00  | 0.02  | 1.40   | -4.10   | 0.96                          | 0.95 | 0.05 | 3.36  | 0.00  | -0.04 | -0.18 |
|               | BW_1851-305-1 | 0.17       | 0.27 | 0.28 | 15.38 | 0.19  | 10.87  | -13.55  | 0.90                          | 0.84 | 0.09 | 5.30  | 0.02  | 1.33  | -0.73 |
|               | BW_710-256-3  | 0.51       | 0.65 | 0.28 | 8.61  | -0.11 | -3.23  | -3.64   | 0.79                          | 0.79 | 0.18 | 5.67  | -0.03 | -0.90 | -1.01 |
|               | BW_765-306-3  | 0.47       | 0.46 | 0.46 | 11.85 | -0.10 | -2.44  | -1.47   | 0.70                          | 0.69 | 0.35 | 8.98  | -0.07 | -1.72 | -0.42 |
|               | BW_781-304-2  | 0.30       | 0.62 | 0.47 | 18.84 | -0.44 | -17.92 | -193.19 | 0.99                          | 0.95 | 0.05 | 1.99  | 0.01  | 0.22  | -1.17 |
|               | HE_11874      | 0.59       | 0.63 | 0.19 | 10.66 | 0.06  | 3.29   | -35.09  | 0.99                          | 0.99 | 0.03 | 1.75  | -0.01 | -0.31 | 0.03  |
|               | HE_12905      | 0.06       | 0.49 | 0.45 | 13.33 | -0.33 | -9.78  | -18.65  | 0.92                          | 0.90 | 0.13 | 3.96  | -0.03 | -0.78 | -0.73 |
|               | HE_12946      | 0.26       | 0.43 | 0.58 | 19.97 | -0.56 | -19.18 | -229.89 | 0.99                          | 0.90 | 0.05 | 1.76  | 0.00  | -0.04 | -0.79 |
|               | HE_13490      | 0.82       | 0.71 | 0.16 | 7.55  | -0.09 | -4.59  | -10.99  | 0.98                          | 0.95 | 0.05 | 2.58  | 0.00  | -0.01 | -0.40 |
|               | HE_13518      | 0.75       | 0.62 | 0.20 | 9.05  | -0.16 | -6.89  | -51.88  | 0.99                          | 0.96 | 0.04 | 1.97  | 0.01  | 0.39  | -1.49 |
|               | RP_2375118200 | 0.12       | 0.79 | 0.24 | 20.23 | -0.22 | -18.58 | -28.33  | 0.95                          | 0.93 | 0.06 | 4.75  | -0.02 | -1.92 | -0.62 |
|               | RP_2375283300 | 0.49       | 0.59 | 0.26 | 11.92 | -0.18 | -8.24  | -3.46   | 0.80                          | 0.74 | 0.16 | 7.37  | -0.06 | -2.63 | -0.70 |



Table S6: Forecasting results of all sequence-to-sequence models.

|               |               | Seq2Seq    |      |      |       |       |        |         | Seq2Seq (GWLt-1) |      |      |       |       |       |       |
|---------------|---------------|------------|------|------|-------|-------|--------|---------|------------------|------|------|-------|-------|-------|-------|
|               | ID            | NSE        | R2   | RMSE | rRMSE | Bias  | rBias  | PI      | NSE              | R2   | RMSE | rRMSE | Bias  | rBias | PI    |
|               | NARX          | BW_1-115-8 | 0.68 | 0.43 | 0.18  | 12.38 | -0.09  | -5.98   | 0.09             | 0.59 | 0.42 | 0.20  | 13.74 | -0.13 | -9.17 |
| BW_103-261-4  |               | 0.75       | 0.51 | 0.14 | 5.41  | -0.08 | -3.38  | 0.38    | 0.84             | 0.63 | 0.09 | 3.64  | -0.03 | -1.00 | 0.63  |
| BW_104-114-5  |               | 0.59       | 0.28 | 0.24 | 8.03  | -0.05 | -1.56  | 0.38    | 0.60             | 0.36 | 0.24 | 8.14  | -0.03 | -1.11 | 0.27  |
| BW_104-307-0  |               | 0.74       | 0.31 | 0.07 | 4.13  | 0.00  | 0.00   | 0.02    | 0.90             | 0.55 | 0.05 | 2.75  | 0.01  | 0.31  | 0.61  |
| BW_138-019-0  |               | -0.06      | 0.08 | 0.09 | 4.79  | -0.05 | -2.40  | 0.10    | 0.31             | 0.10 | 0.08 | 4.06  | -0.03 | -1.48 | 0.28  |
| BW_157-260-8  |               | 0.88       | 0.55 | 0.08 | 4.63  | -0.01 | -0.46  | 0.52    | 0.72             | 0.48 | 0.12 | 7.07  | 0.01  | 0.64  | 0.20  |
| BW_1851-305-1 |               | 0.73       | 0.30 | 0.10 | 5.51  | 0.06  | 3.12   | 0.06    | 0.77             | 0.33 | 0.09 | 5.16  | 0.07  | 3.75  | -0.09 |
| BW_710-256-3  |               | 0.76       | 0.62 | 0.12 | 3.76  | -0.03 | -0.89  | 0.81    | -0.15            | 0.16 | 0.31 | 9.36  | -0.06 | -1.82 | 0.13  |
| BW_765-306-3  |               | -0.07      | 0.16 | 0.52 | 13.17 | -0.21 | -5.47  | 0.05    | -0.31            | 0.21 | 0.55 | 14.12 | -0.16 | -4.17 | -0.03 |
| BW_781-304-2  |               | 0.89       | 0.13 | 0.14 | 5.62  | -0.10 | -4.12  | -1.15   | 0.96             | 0.34 | 0.10 | 3.86  | 0.01  | 0.28  | 0.04  |
| HE_11874      |               | 0.90       | 0.72 | 0.07 | 3.89  | -0.02 | -0.97  | 0.78    | 0.93             | 0.86 | 0.06 | 3.61  | 0.00  | -0.22 | 0.83  |
| HE_12905      |               | 0.32       | 0.32 | 0.25 | 7.40  | -0.01 | -0.28  | 0.11    | 0.05             | 0.50 | 0.33 | 9.75  | -0.04 | -1.15 | -0.33 |
| HE_12946      |               | 0.89       | 0.20 | 0.17 | 5.92  | -0.14 | -4.75  | -5.97   | 0.98             | 0.22 | 0.08 | 2.71  | 0.04  | 1.24  | -0.92 |
| HE_13490      |               | 0.84       | 0.37 | 0.08 | 3.90  | -0.03 | -1.67  | 0.48    | 0.87             | 0.38 | 0.10 | 4.87  | 0.00  | 0.06  | 0.33  |
| HE_13518      |               | 0.88       | 0.42 | 0.08 | 3.60  | -0.04 | -1.85  | 0.19    | 0.77             | 0.41 | 0.14 | 6.02  | -0.01 | -0.23 | -1.14 |
| RP_2375118200 |               | 0.46       | 0.35 | 0.14 | 11.35 | -0.07 | -5.37  | 0.02    | 0.81             | 0.46 | 0.08 | 6.90  | -0.03 | -2.68 | 0.60  |
| RP_2375283300 |               | 0.30       | 0.19 | 0.23 | 10.47 | -0.17 | -7.68  | -0.36   | 0.18             | 0.19 | 0.25 | 11.48 | -0.18 | -8.28 | -0.38 |
| LSTM          | BW_1-115-8    | 0.24       | 0.70 | 0.22 | 15.28 | -0.17 | -11.65 | -0.49   | 0.57             | 0.66 | 0.18 | 12.34 | -0.08 | -5.30 | 0.05  |
|               | BW_103-261-4  | 0.46       | 0.62 | 0.22 | 8.73  | -0.15 | -5.92  | -0.69   | 0.74             | 0.65 | 0.14 | 5.46  | -0.04 | -1.57 | 0.26  |
|               | BW_104-114-5  | 0.51       | 0.46 | 0.25 | 8.60  | -0.01 | -0.48  | 0.34    | 0.56             | 0.37 | 0.27 | 9.26  | 0.02  | 0.82  | 0.32  |
|               | BW_104-307-0  | 0.78       | 0.68 | 0.09 | 4.79  | 0.05  | 2.51   | -0.58   | 0.86             | 0.75 | 0.07 | 3.69  | 0.01  | 0.38  | 0.35  |
|               | BW_138-019-0  | 0.00       | 0.37 | 0.09 | 4.66  | -0.04 | -2.05  | 0.10    | 0.00             | 0.40 | 0.09 | 4.55  | -0.02 | -0.95 | 0.07  |
|               | BW_157-260-8  | 0.38       | 0.60 | 0.18 | 10.82 | -0.13 | -8.04  | -1.19   | 0.72             | 0.67 | 0.10 | 6.44  | 0.00  | 0.28  | 0.28  |
|               | BW_1851-305-1 | -0.06      | 0.41 | 0.28 | 15.57 | 0.25  | 13.79  | -4.12   | 0.61             | 0.47 | 0.13 | 7.13  | 0.07  | 3.67  | -0.42 |
|               | BW_710-256-3  | -0.12      | 0.51 | 0.28 | 8.64  | 0.01  | 0.27   | -0.01   | -0.27            | 0.47 | 0.30 | 9.31  | -0.05 | -1.62 | 0.12  |
|               | BW_765-306-3  | -0.12      | 0.34 | 0.56 | 14.33 | -0.15 | -3.84  | 0.04    | -0.03            | 0.30 | 0.58 | 14.84 | -0.17 | -4.37 | 0.01  |
|               | BW_781-304-2  | 0.29       | 0.01 | 0.44 | 17.70 | -0.43 | -17.37 | -15.22  | 0.95             | 0.61 | 0.09 | 3.66  | 0.01  | 0.32  | -0.27 |
|               | HE_11874      | 0.80       | 0.92 | 0.14 | 7.54  | -0.01 | -0.41  | 0.36    | 0.85             | 0.92 | 0.09 | 4.94  | -0.01 | -0.57 | 0.73  |
|               | HE_12905      | -0.01      | 0.49 | 0.34 | 10.14 | -0.25 | -7.35  | -0.43   | 0.15             | 0.55 | 0.26 | 7.73  | -0.19 | -5.77 | -0.17 |
|               | HE_12946      | -0.47      | 0.32 | 0.81 | 27.99 | -0.81 | -27.89 | -113.32 | 0.99             | 0.37 | 0.05 | 1.80  | 0.01  | 0.41  | 0.09  |
|               | HE_13490      | -0.08      | 0.43 | 0.30 | 14.72 | -0.30 | -14.47 | -4.39   | 0.75             | 0.37 | 0.17 | 8.03  | -0.01 | -0.35 | -0.28 |
|               | HE_13518      | 0.40       | 0.63 | 0.32 | 14.20 | -0.32 | -13.96 | -5.50   | 0.96             | 0.74 | 0.06 | 2.87  | -0.02 | -0.71 | 0.49  |
|               | RP_2375118200 | 0.12       | 0.62 | 0.21 | 17.73 | -0.20 | -16.81 | -1.49   | 0.60             | 0.68 | 0.13 | 10.94 | -0.05 | -4.54 | 0.05  |
|               | RP_2375283300 | 0.07       | 0.38 | 0.29 | 13.37 | -0.24 | -11.02 | -0.92   | 0.22             | 0.22 | 0.25 | 11.52 | -0.21 | -9.65 | -0.64 |
| CNN           | BW_1-115-8    | 0.49       | 0.60 | 0.22 | 15.25 | -0.16 | -10.96 | -0.41   | 0.45             | 0.54 | 0.18 | 12.67 | -0.11 | -7.36 | -0.31 |
|               | BW_103-261-4  | 0.54       | 0.65 | 0.21 | 8.29  | -0.13 | -5.26  | -0.69   | 0.71             | 0.63 | 0.13 | 5.20  | -0.02 | -0.80 | 0.18  |
|               | BW_104-114-5  | 0.57       | 0.43 | 0.30 | 10.34 | -0.04 | -1.24  | 0.09    | 0.55             | 0.47 | 0.24 | 8.36  | 0.01  | 0.47  | 0.30  |
|               | BW_104-307-0  | 0.49       | 0.59 | 0.12 | 6.67  | 0.09  | 4.93   | -0.91   | 0.83             | 0.66 | 0.07 | 3.64  | -0.02 | -0.89 | 0.16  |
|               | BW_138-019-0  | 0.00       | 0.26 | 0.09 | 4.65  | -0.04 | -2.17  | 0.13    | 0.04             | 0.23 | 0.09 | 4.62  | -0.03 | -1.56 | 0.08  |
|               | BW_157-260-8  | 0.45       | 0.65 | 0.17 | 10.42 | -0.08 | -4.83  | -0.91   | 0.62             | 0.66 | 0.13 | 8.03  | 0.00  | 0.01  | -0.09 |
|               | BW_1851-305-1 | -0.18      | 0.48 | 0.28 | 15.74 | 0.25  | 14.15  | -3.98   | 0.57             | 0.52 | 0.13 | 7.03  | 0.09  | 4.77  | -0.67 |
|               | BW_710-256-3  | 0.07       | 0.41 | 0.30 | 9.09  | 0.01  | 0.17   | 0.16    | 0.00             | 0.45 | 0.29 | 9.01  | 0.01  | 0.30  | 0.22  |
|               | BW_765-306-3  | -0.28      | 0.32 | 0.56 | 14.41 | -0.26 | -6.64  | -0.03   | -0.16            | 0.35 | 0.55 | 13.99 | -0.17 | -4.28 | 0.05  |
|               | BW_781-304-2  | 0.23       | 0.06 | 0.45 | 18.33 | -0.44 | -17.94 | -17.34  | 0.96             | 0.36 | 0.10 | 3.95  | -0.02 | -0.87 | -0.70 |
|               | HE_11874      | 0.66       | 0.90 | 0.16 | 9.07  | 0.01  | 0.50   | 0.18    | 0.87             | 0.95 | 0.08 | 4.40  | 0.00  | 0.03  | 0.79  |
|               | HE_12905      | -0.42      | 0.46 | 0.34 | 9.99  | -0.28 | -8.45  | -0.68   | 0.36             | 0.49 | 0.27 | 7.97  | -0.03 | -0.83 | -0.02 |
|               | HE_12946      | 0.46       | 0.09 | 0.50 | 17.33 | -0.50 | -17.26 | -66.68  | 0.98             | 0.30 | 0.09 | 2.94  | -0.02 | -0.75 | -0.85 |
|               | HE_13490      | 0.62       | 0.37 | 0.19 | 9.22  | -0.16 | -7.58  | -1.64   | 0.83             | 0.57 | 0.14 | 6.63  | 0.00  | -0.11 | 0.20  |
|               | HE_13518      | 0.43       | 0.54 | 0.28 | 12.17 | -0.27 | -11.96 | -3.08   | 0.93             | 0.75 | 0.07 | 3.30  | 0.03  | 1.16  | 0.38  |
|               | RP_2375118200 | 0.22       | 0.50 | 0.19 | 15.55 | -0.18 | -14.46 | -0.67   | 0.61             | 0.63 | 0.14 | 11.18 | -0.05 | -3.86 | 0.18  |
|               | RP_2375283300 | 0.14       | 0.27 | 0.30 | 13.60 | -0.24 | -11.03 | -0.88   | 0.42             | 0.18 | 0.22 | 10.19 | -0.13 | -5.93 | -0.24 |

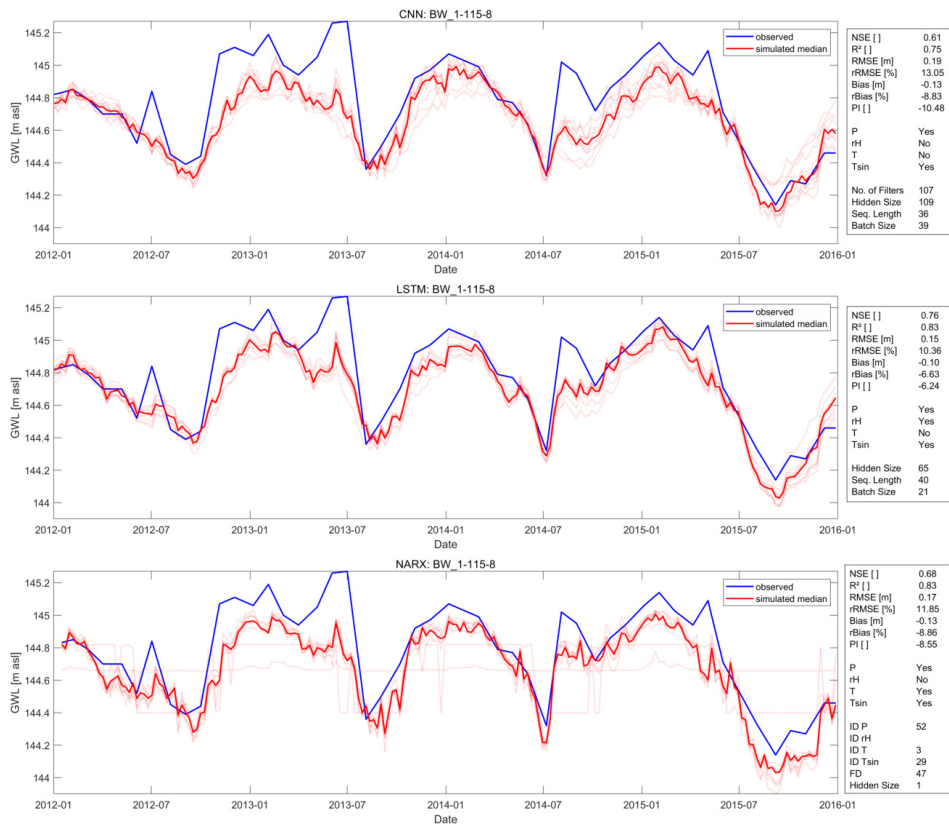

Figure S1: Seq2Val test results for well BW\_1-115-8

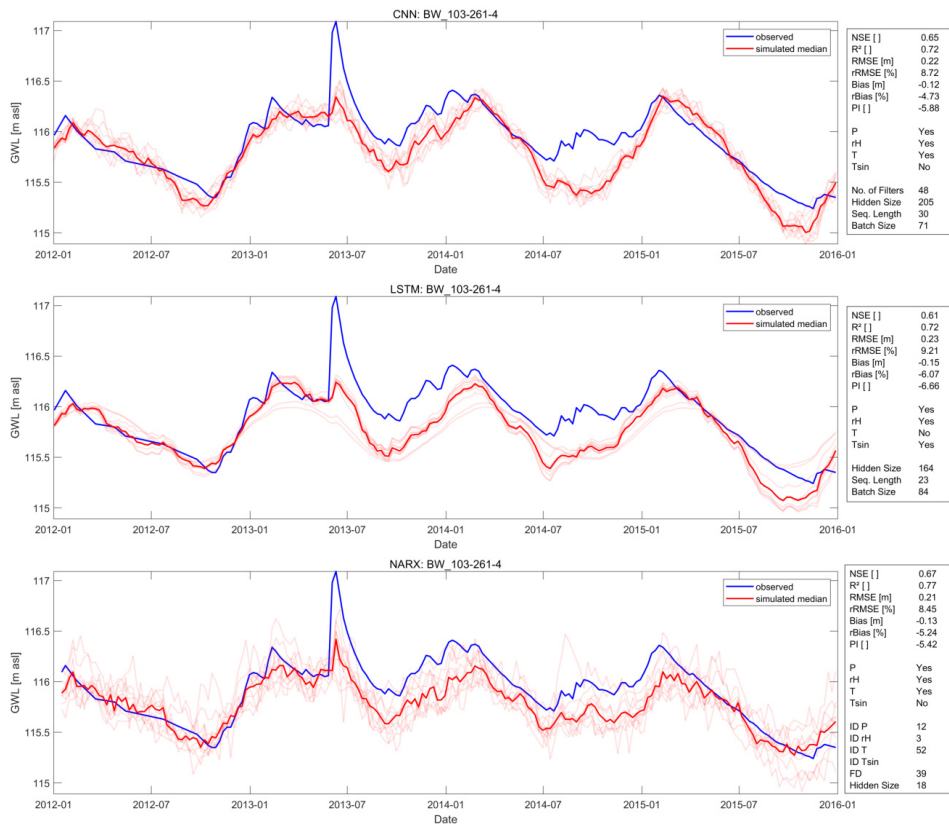

Figure S2: Seq2Val test results for well BW\_103-261-4

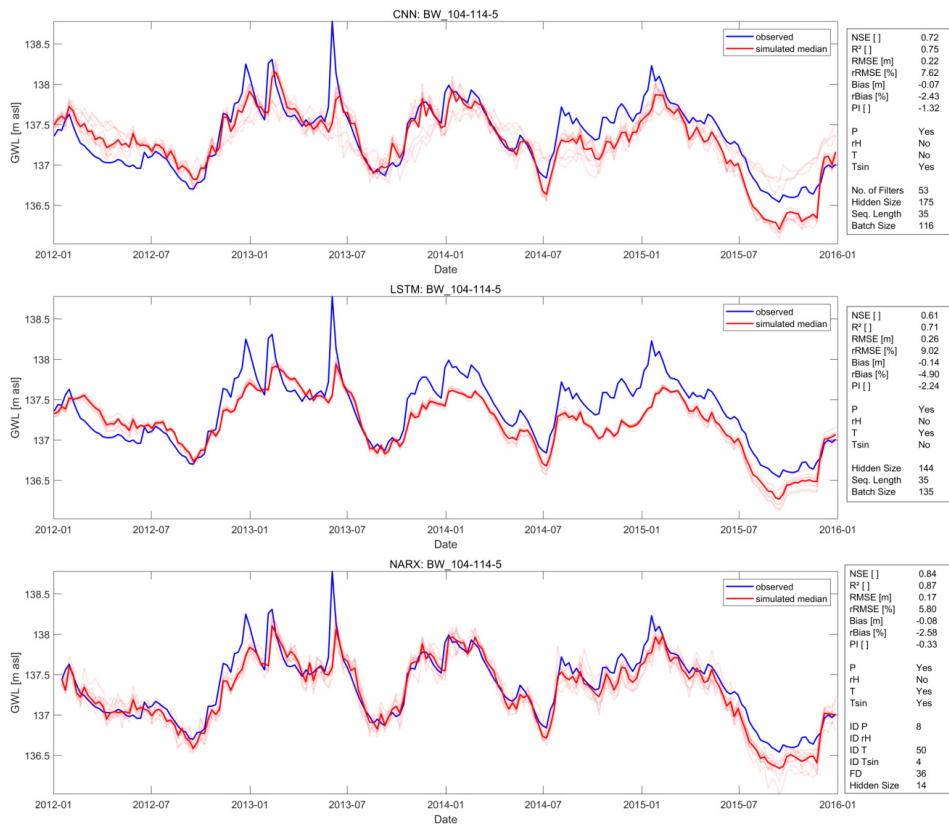

Figure S3: Seq2Val test results for well BW\_104-114-5

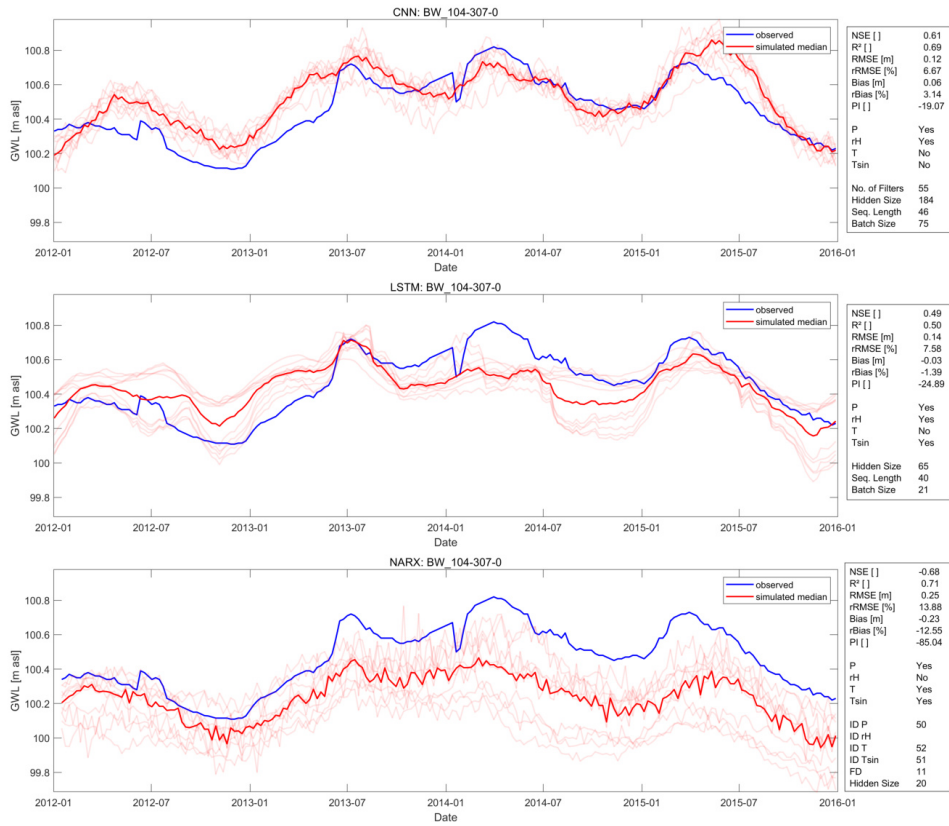

Figure S4: Seq2Val test results for well BW\_104-307-0

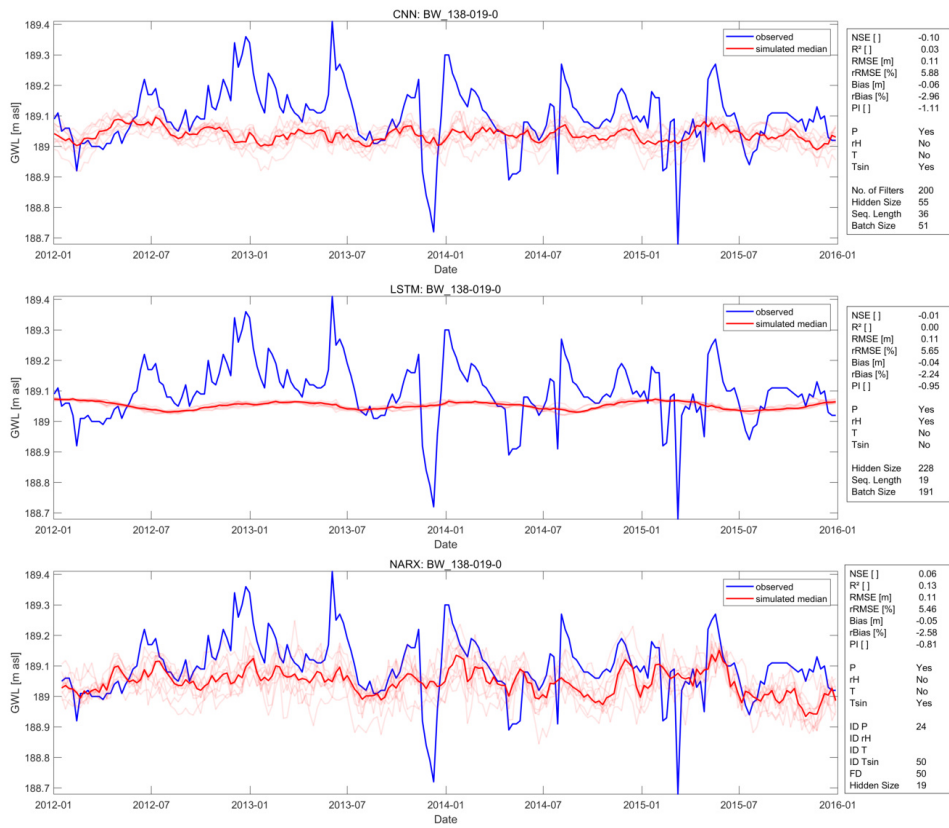

Figure S5: Seq2Val test results for well BW\_138-019-0

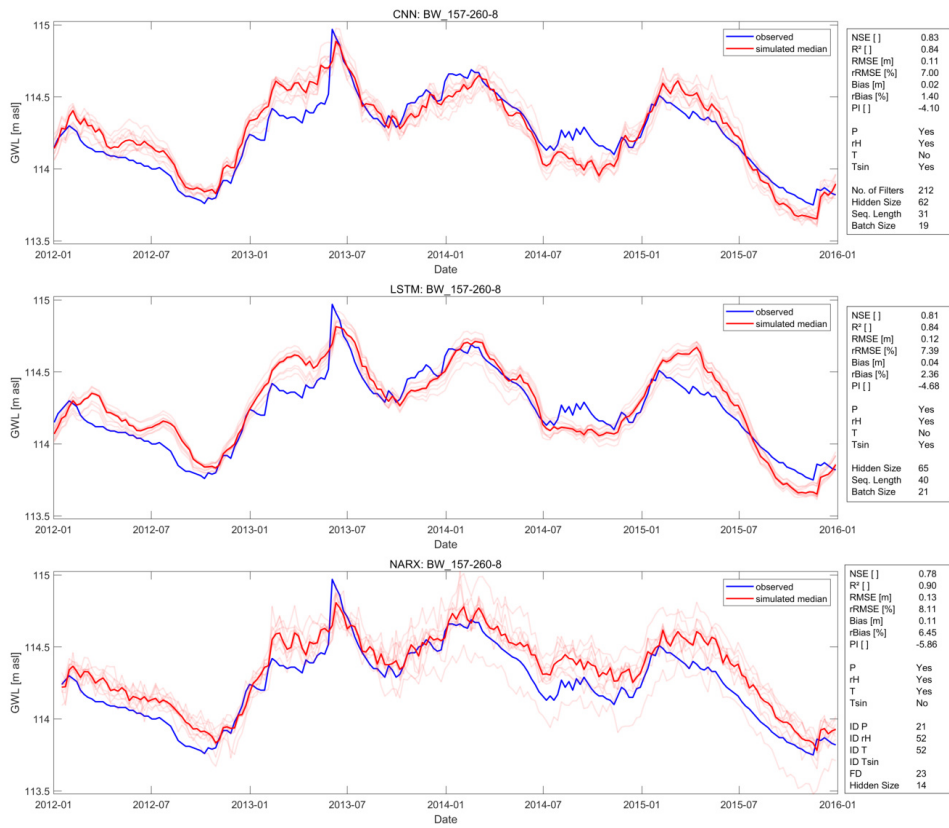

Figure S6: Seq2Val test results for well BW\_157-260-8

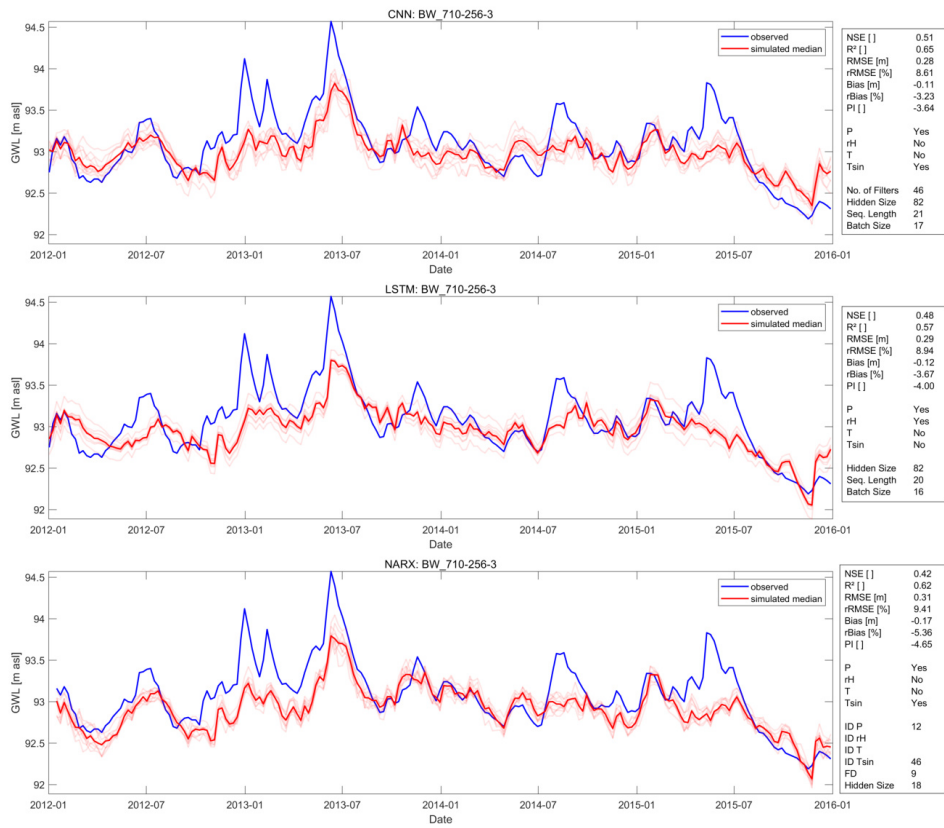

Figure S7: Seq2Val test results for well BW\_710-256-3



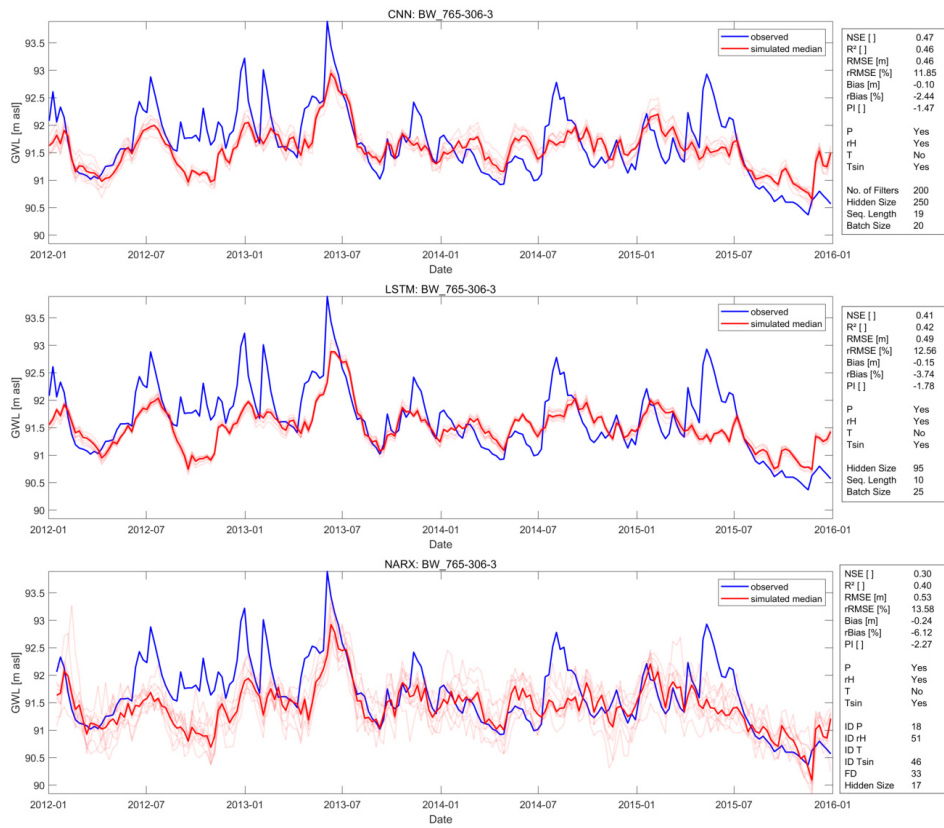

Figure S8: Seq2Val test results for well BW\_765-306-3

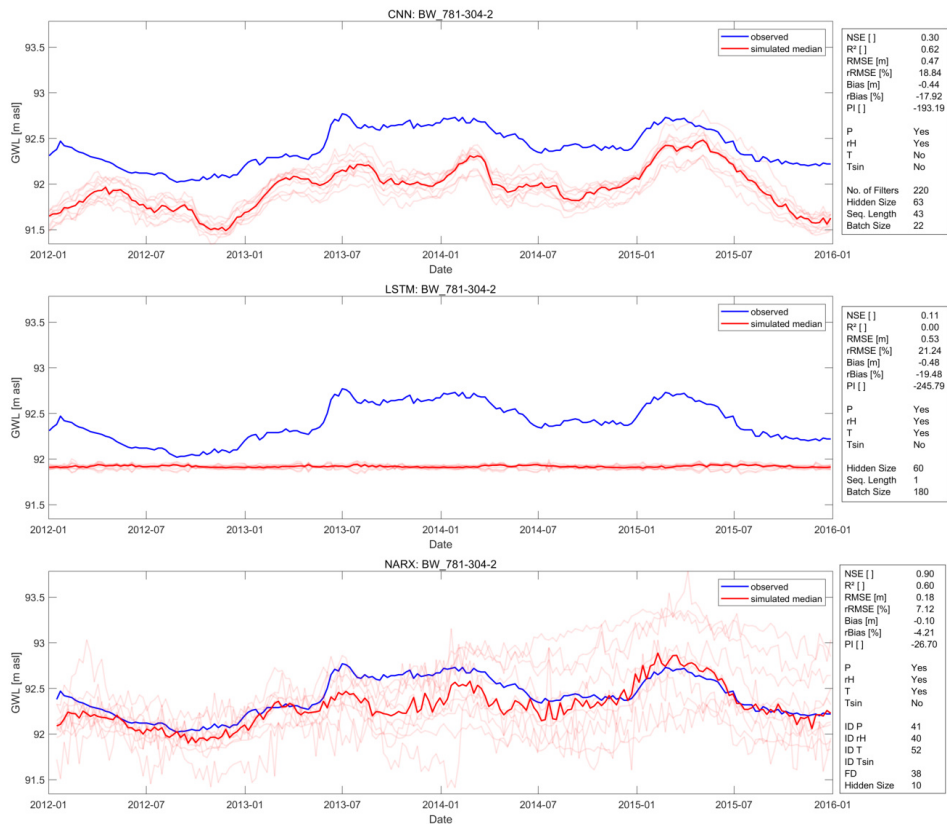

Figure S9: Seq2Val test results for well BW\_781-304-2

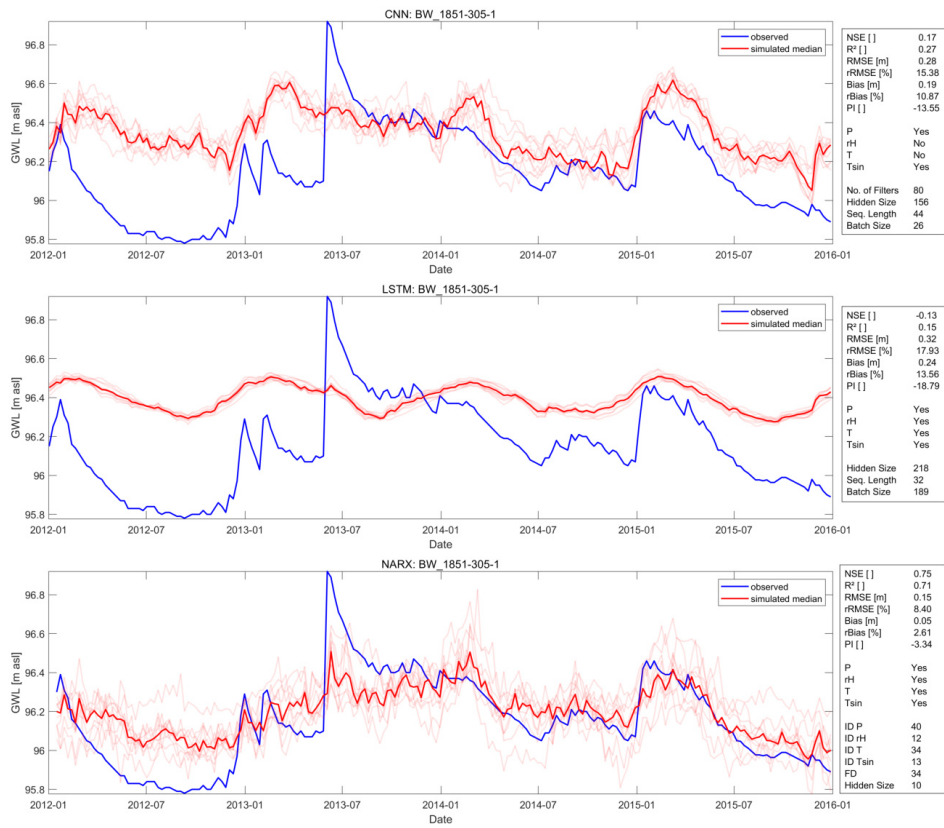

Figure S10: Seq2Val test results for well BW\_1851-305-1

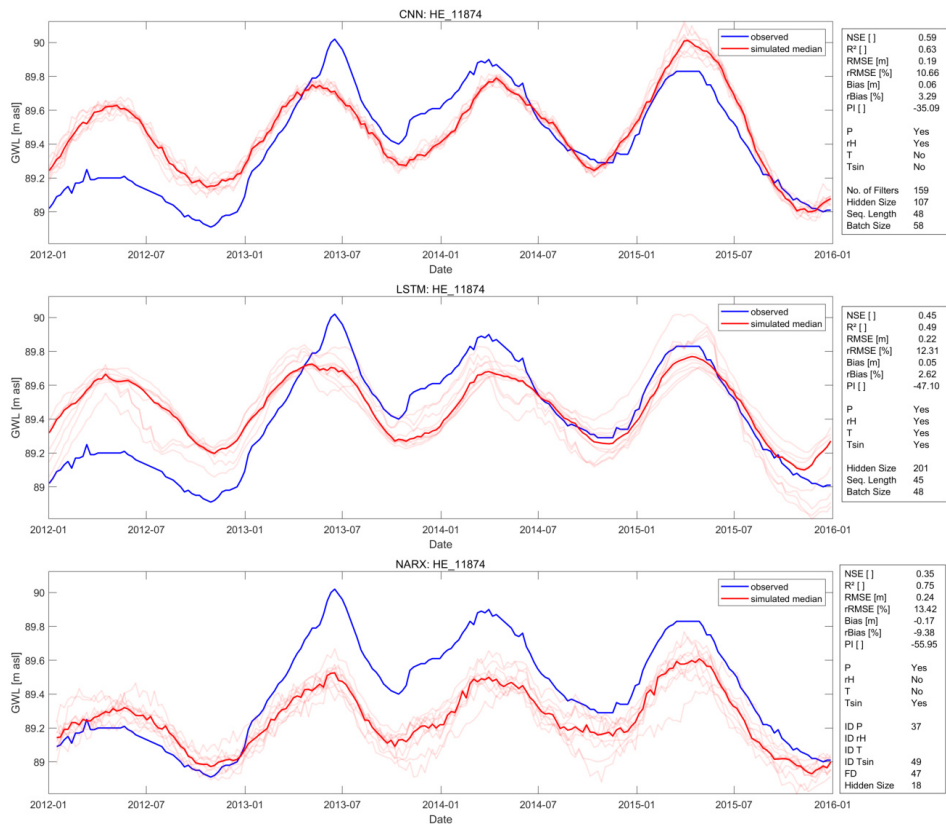

Figure S11: Seq2Val test results for well HE\_11874

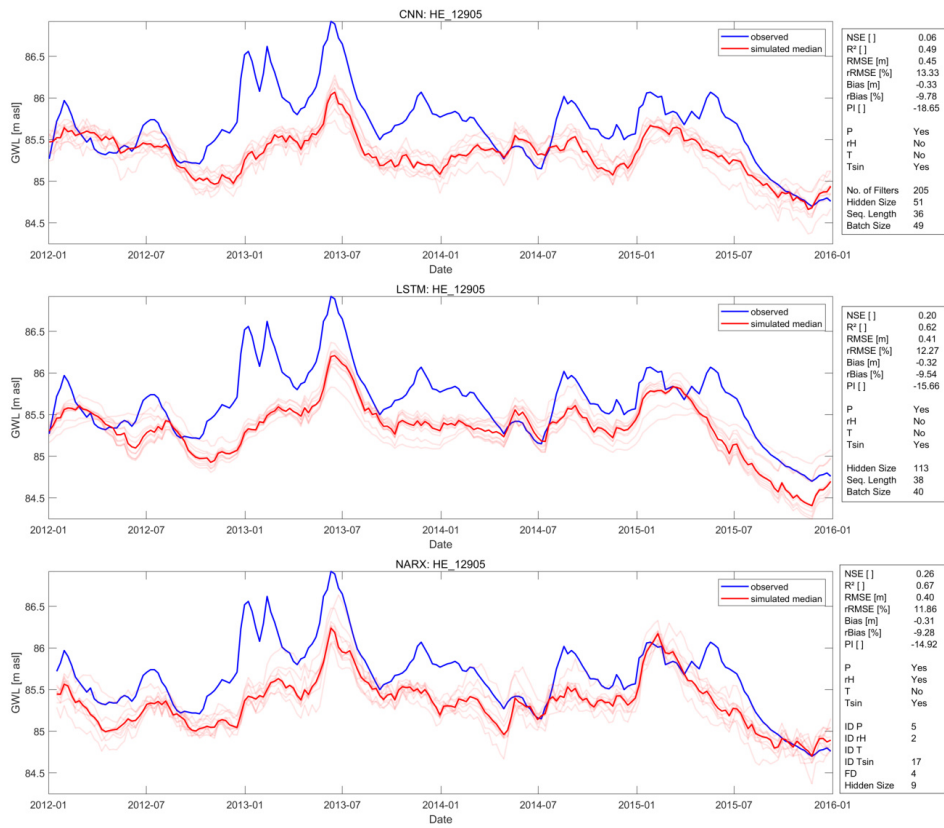

Figure S12: Seq2Val test results for well HE\_12905

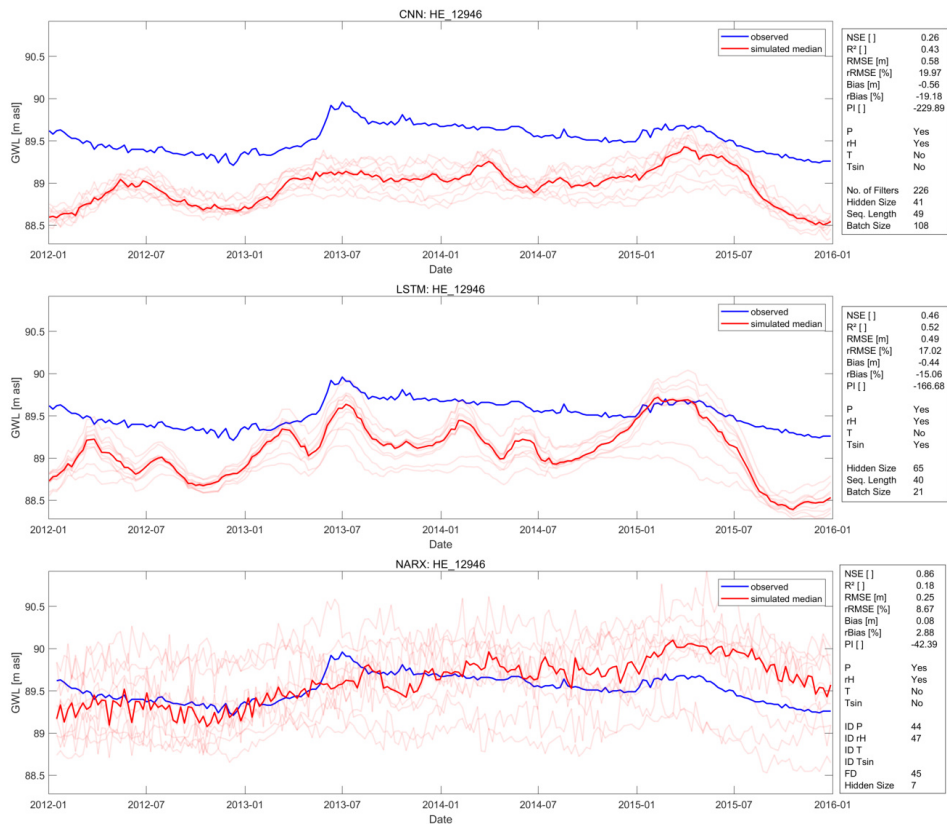

Figure S13: Seq2Val test results for well HE\_12946

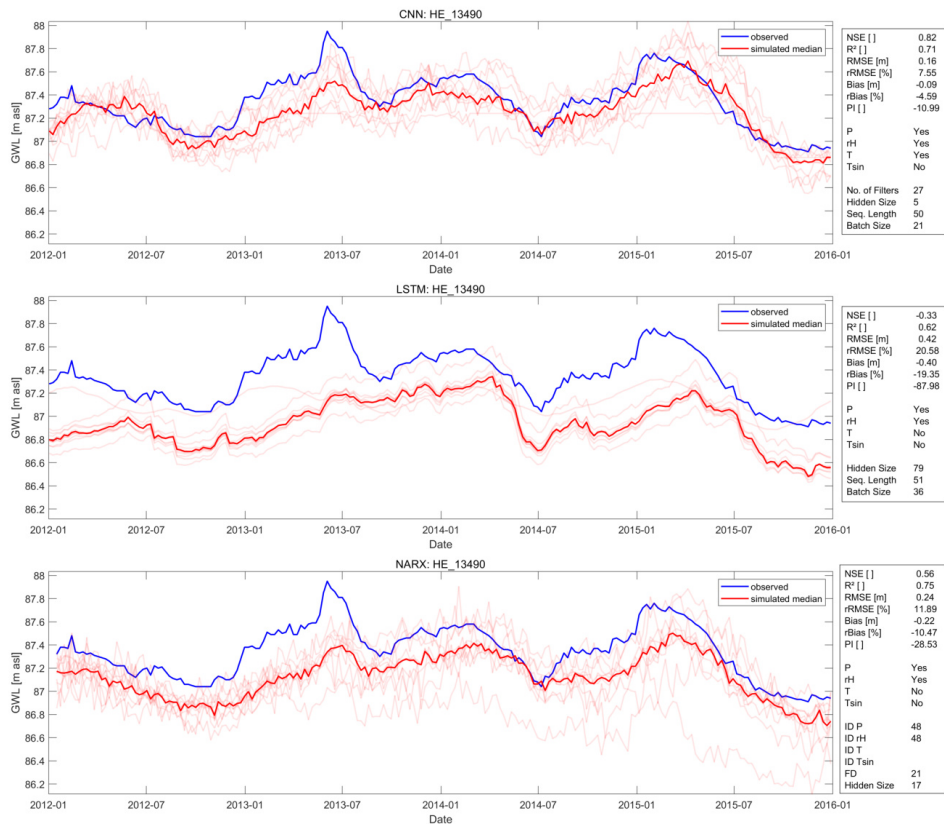

Figure S14: Seq2Val test results for well HE\_13490

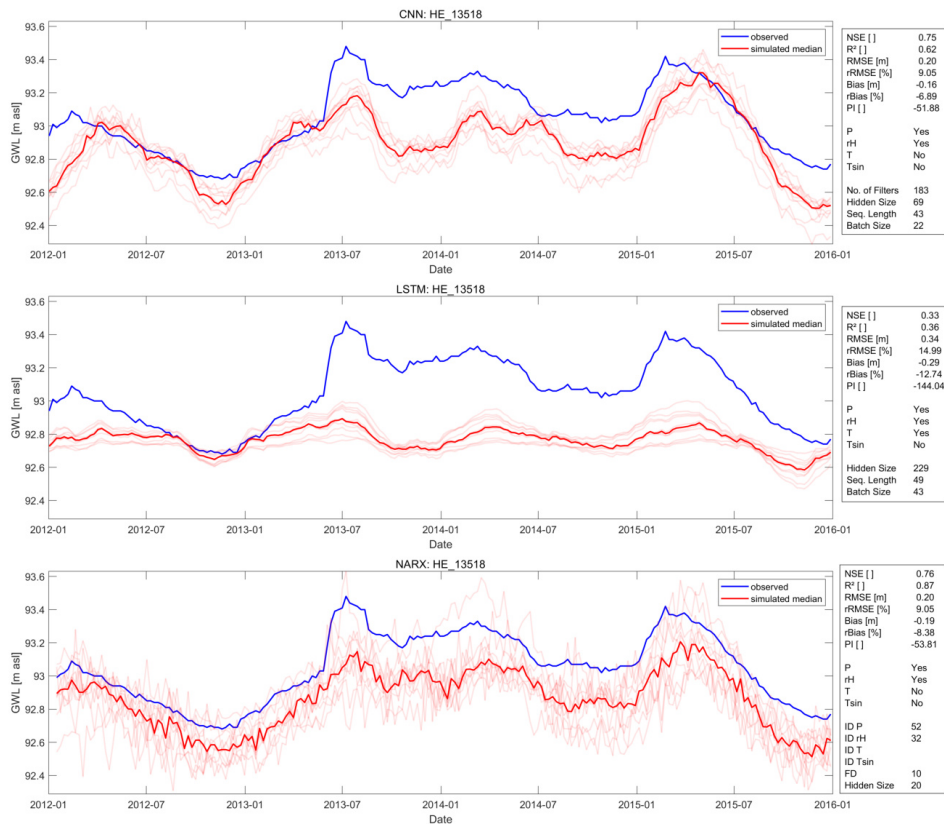

Figure S15: Seq2Val test results for well HE\_13518



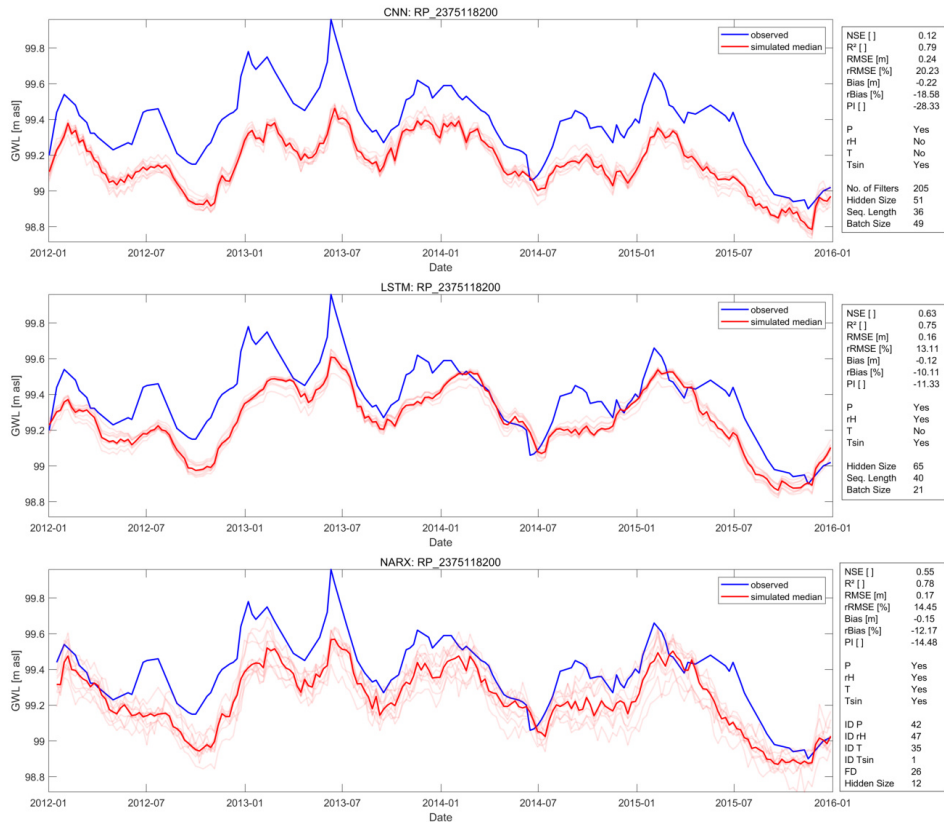

Figure S16: Seq2Val test results for well RP\_2375118200

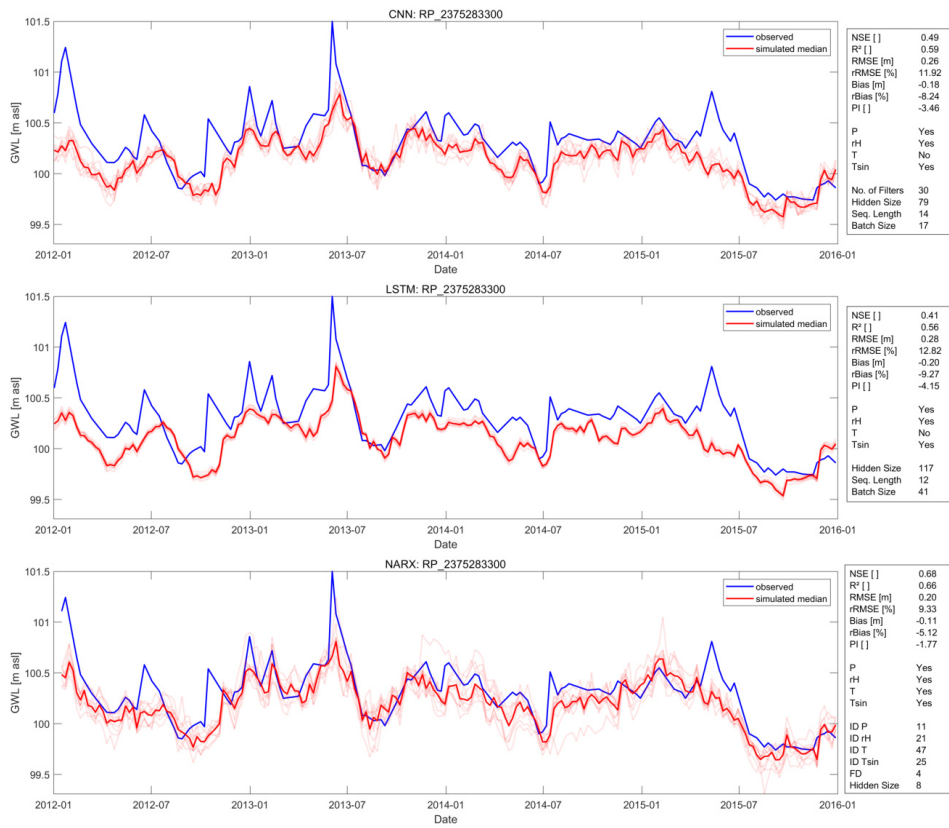

Figure S17: Seq2Val test results for well RP\_2375283300

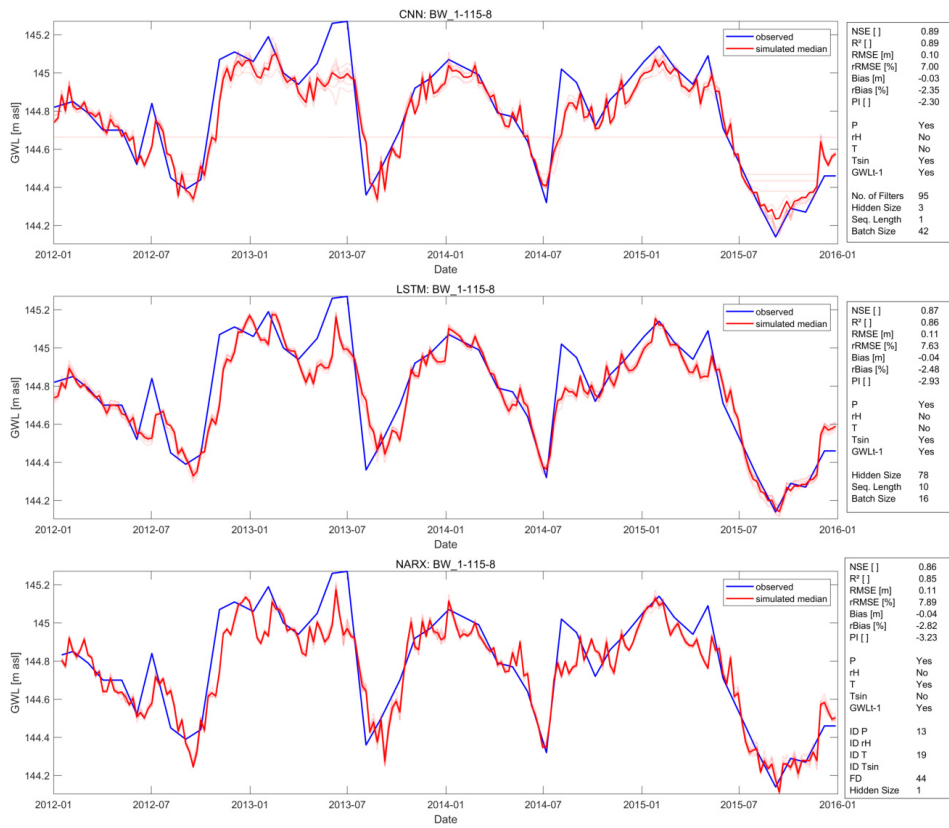

Figure S18: Seq2Val  $GWL_{t-1}$  test results for well BW\_1-115-8

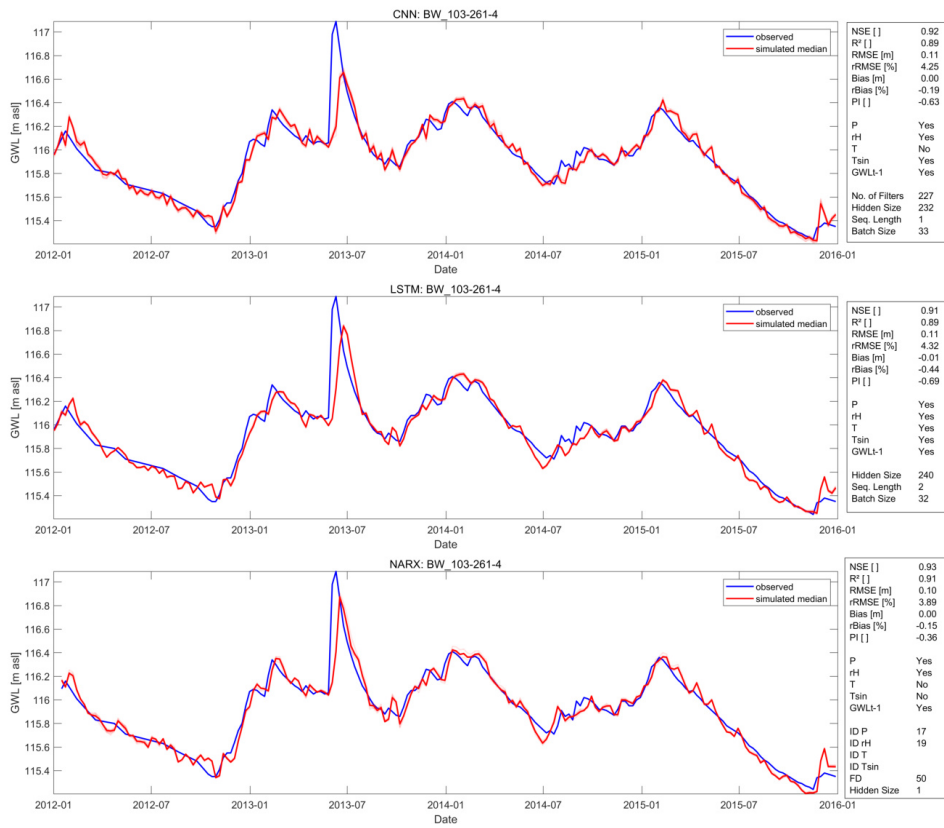

Figure S19: Seq2Val  $GWL_{t-1}$  test results for well BW\_103-261-4

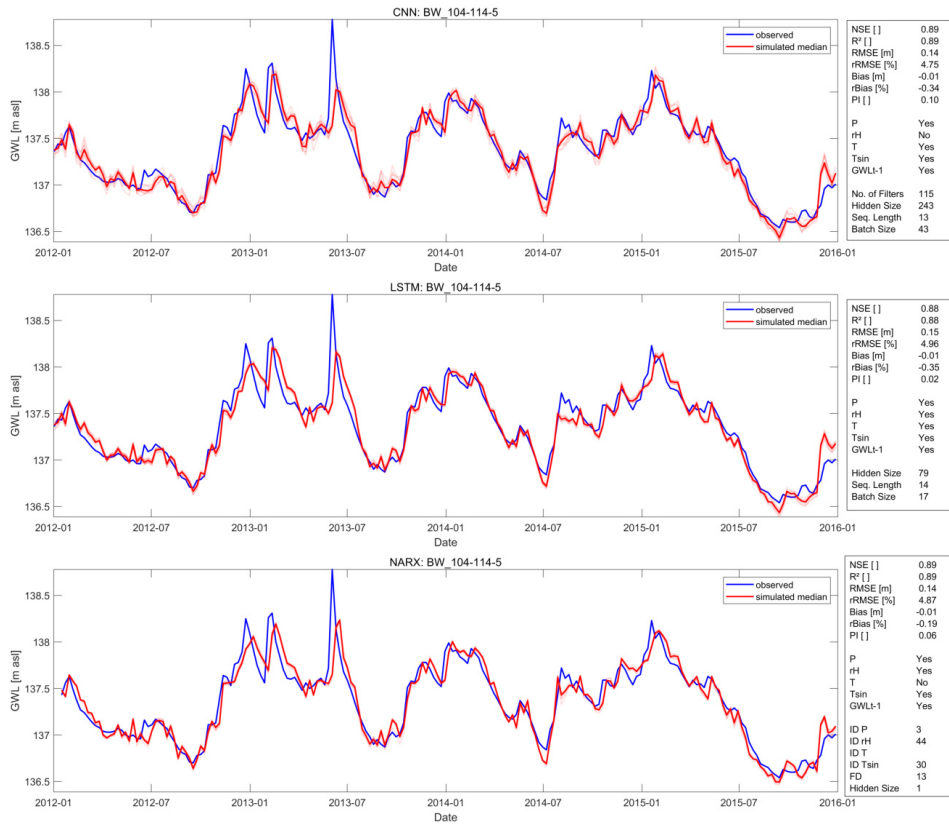

Figure S20: Seq2Val  $GWL_{t-1}$  test results for well BW\_104-114-5

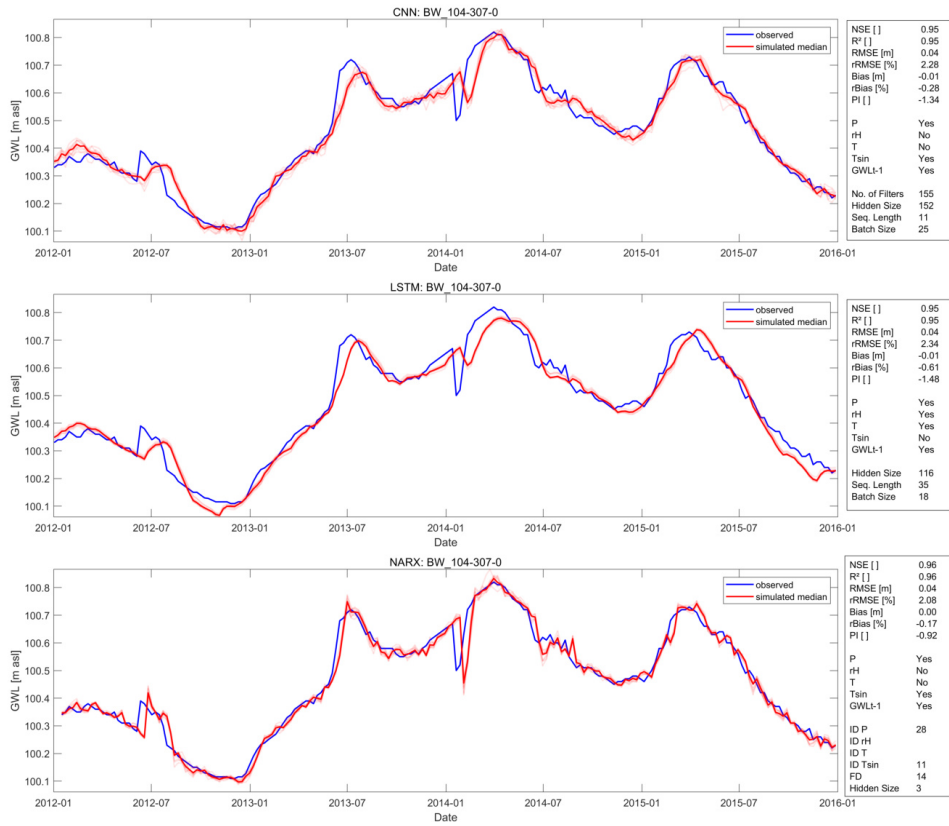

Figure S21: Seq2Val  $GWL_{t-1}$  test results for well BW\_104-307-0

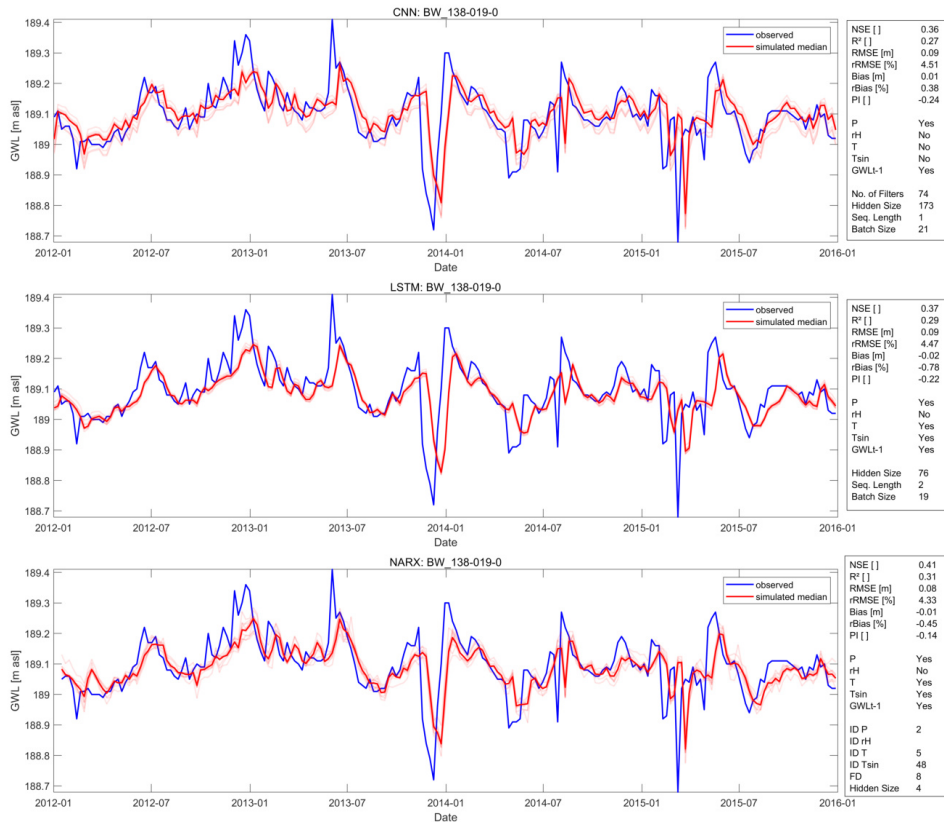

Figure S22: Seq2Val  $GWL_{t-1}$  test results for well BW\_138-019-0

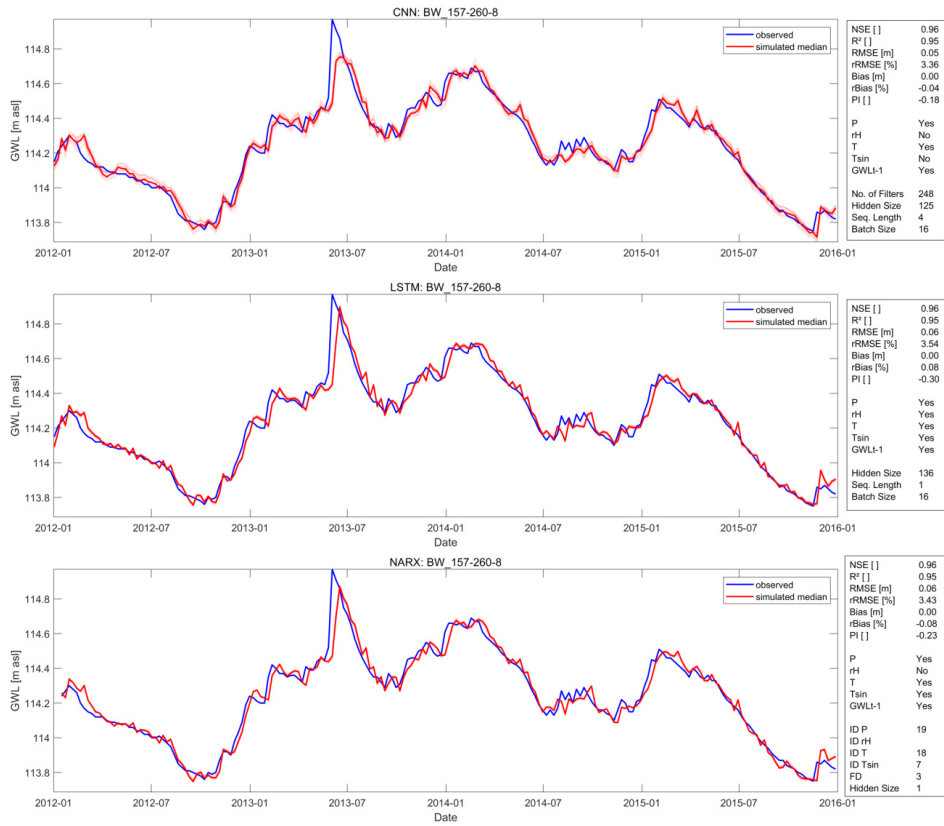

Figure S23: Seq2Val  $GWL_{t-1}$  test results for well BW\_157-260-8



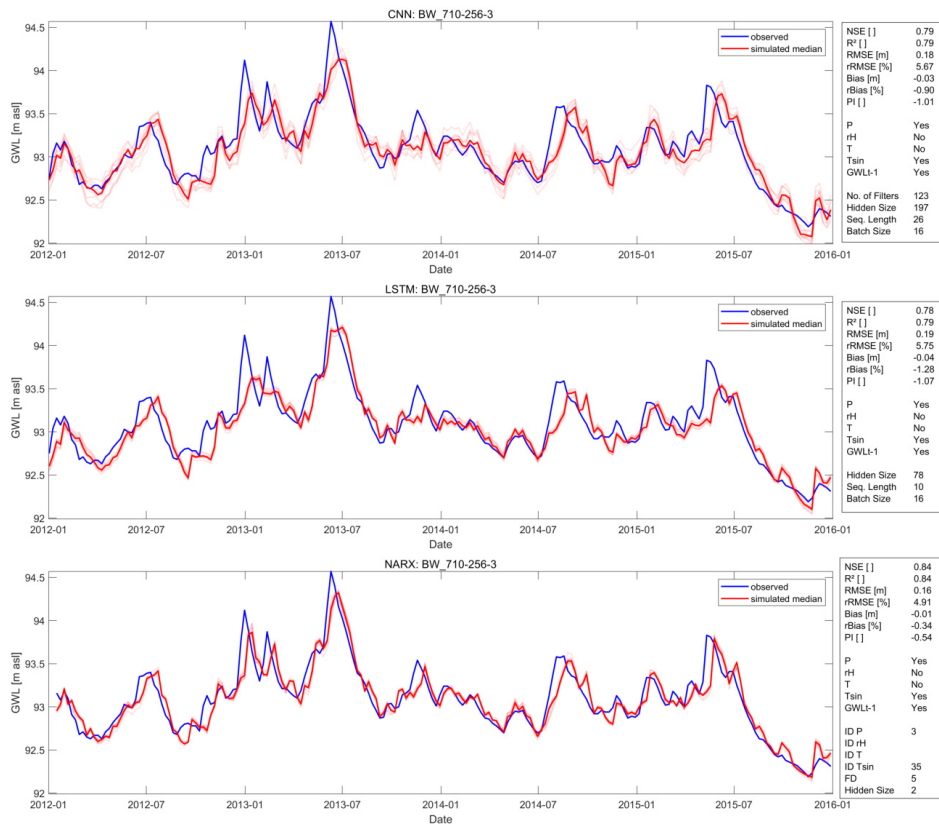

Figure S24: Seq2Val  $GWL_{t-1}$  test results for well BW\_710-256-3

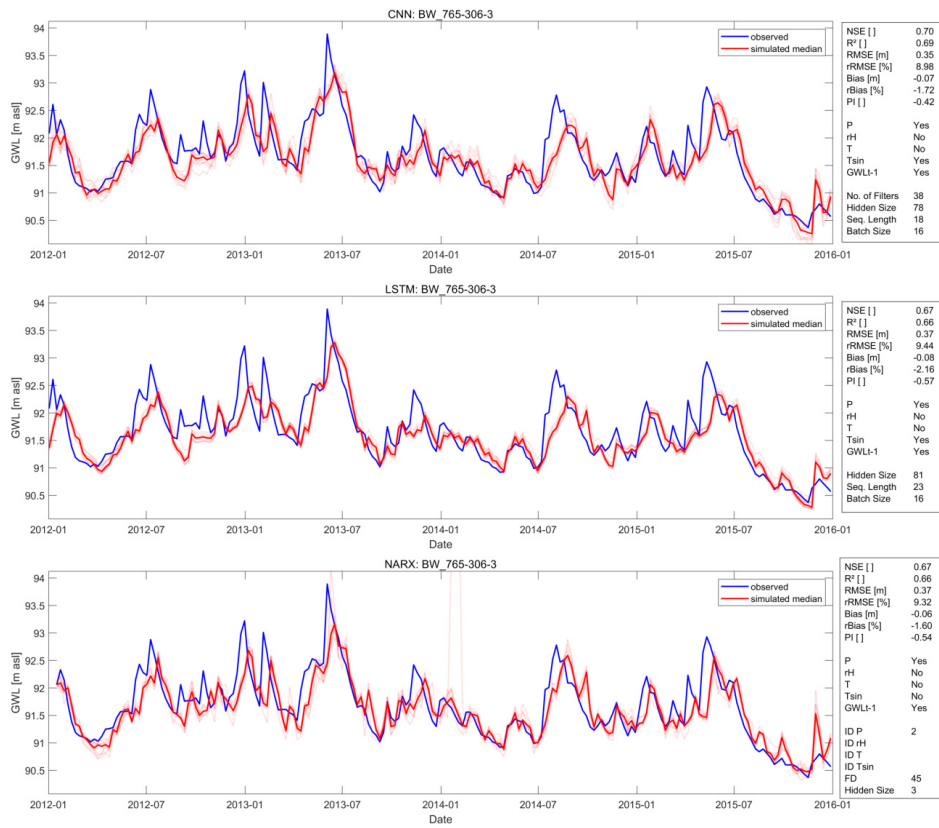

Figure S25: Seq2Val  $GWL_{t-1}$  test results for well BW\_765-306-3

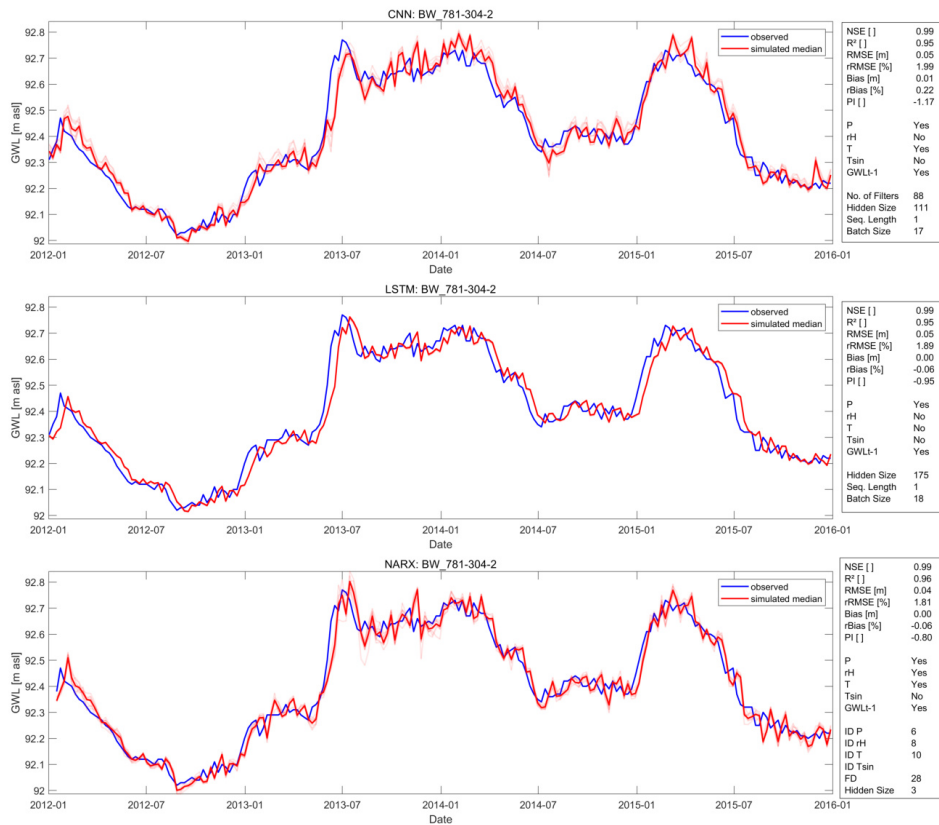

Figure S26: Seq2Val  $GWL_{t-1}$  test results for well BW\_781-304-2

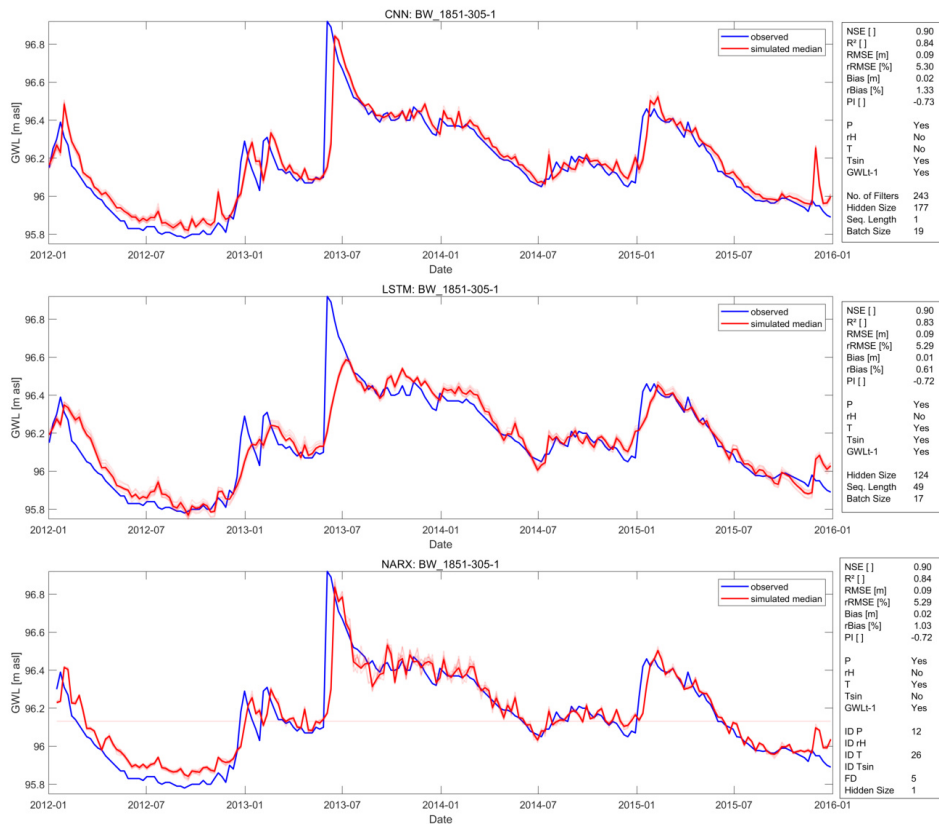

Figure S27: Seq2Val  $GWL_{t-1}$  test results for well BW\_1851-305-1

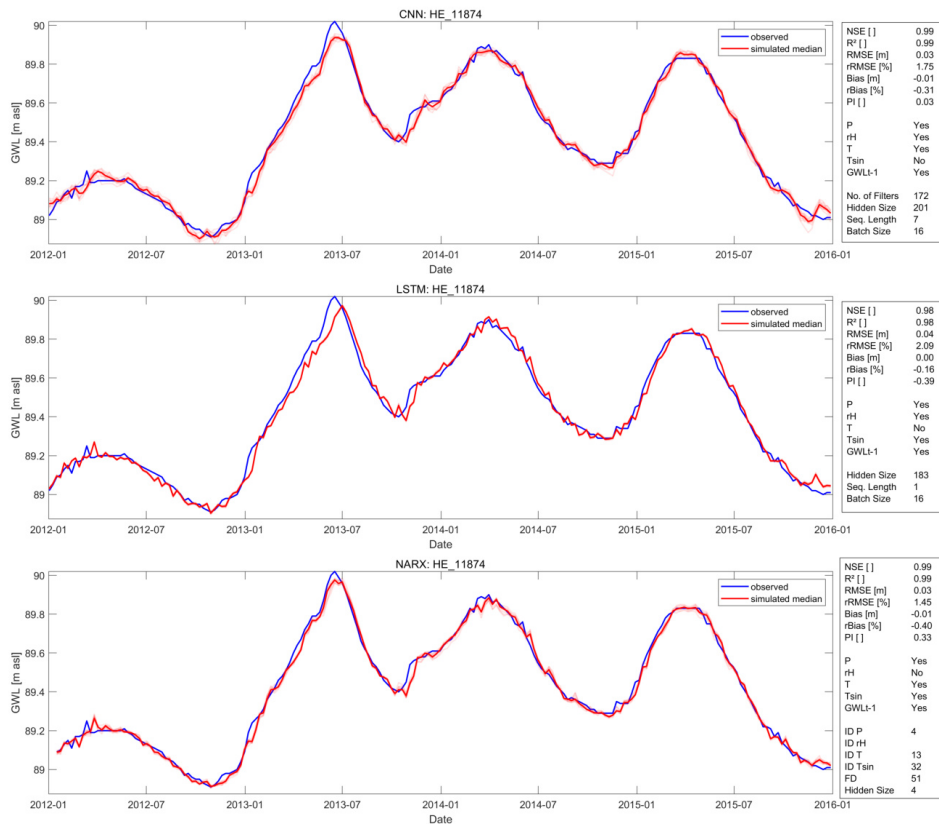

Figure S28: Seq2Val  $GWL_{t-1}$  test results for well HE\_11874

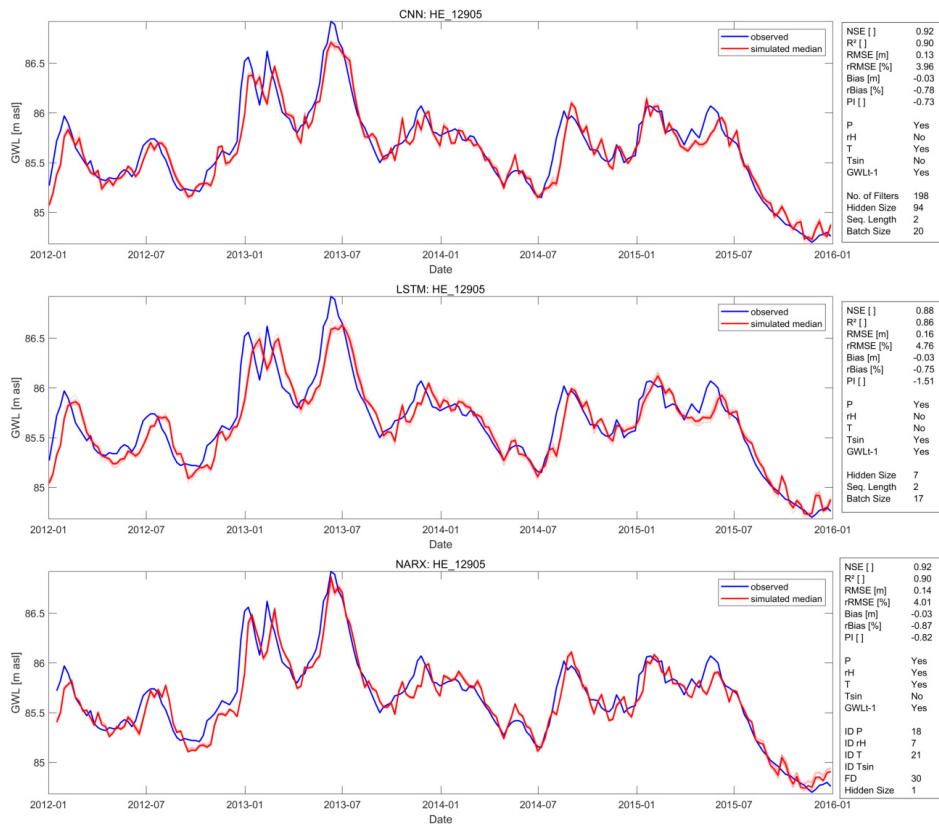

Figure S29: Seq2Val  $GWL_{t-1}$  test results for well HE\_12905

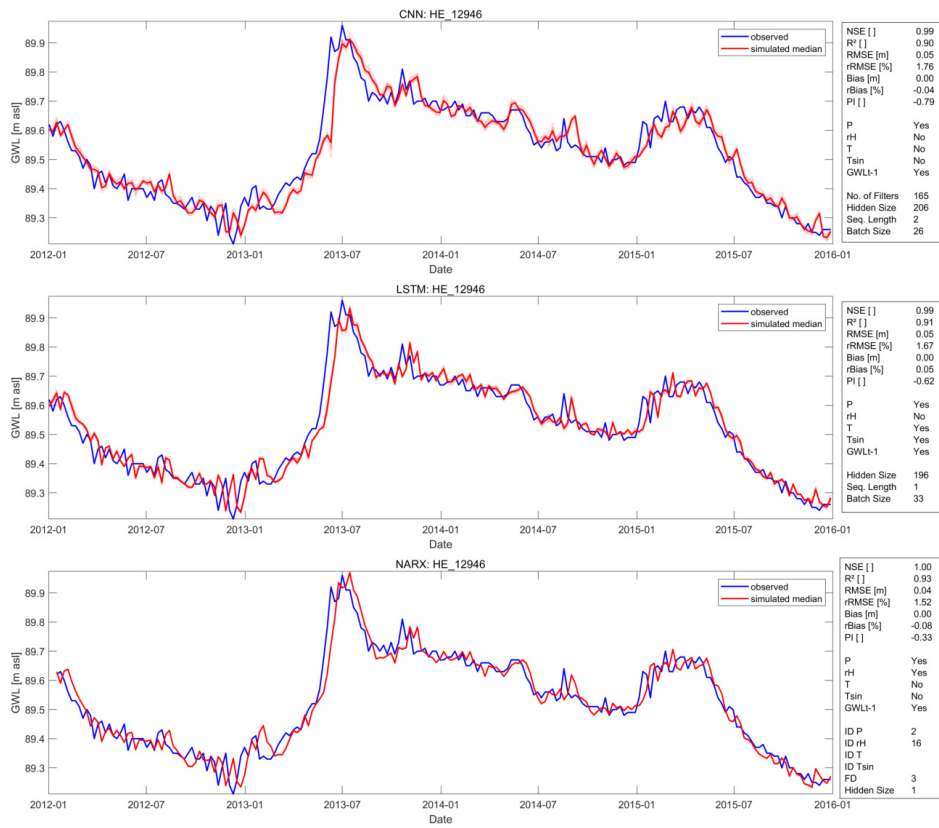

Figure S30: Seq2Val  $GWL_{t-1}$  test results for well HE\_12946

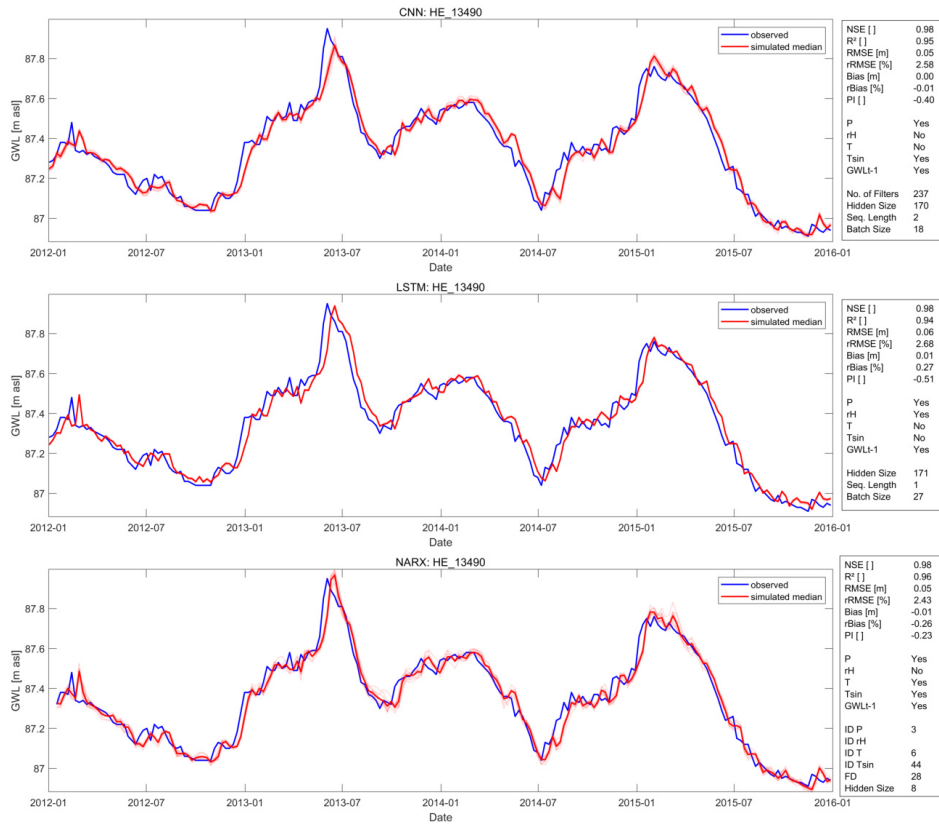

Figure S31: Seq2Val  $GWL_{t-1}$  test results for well HE\_13490



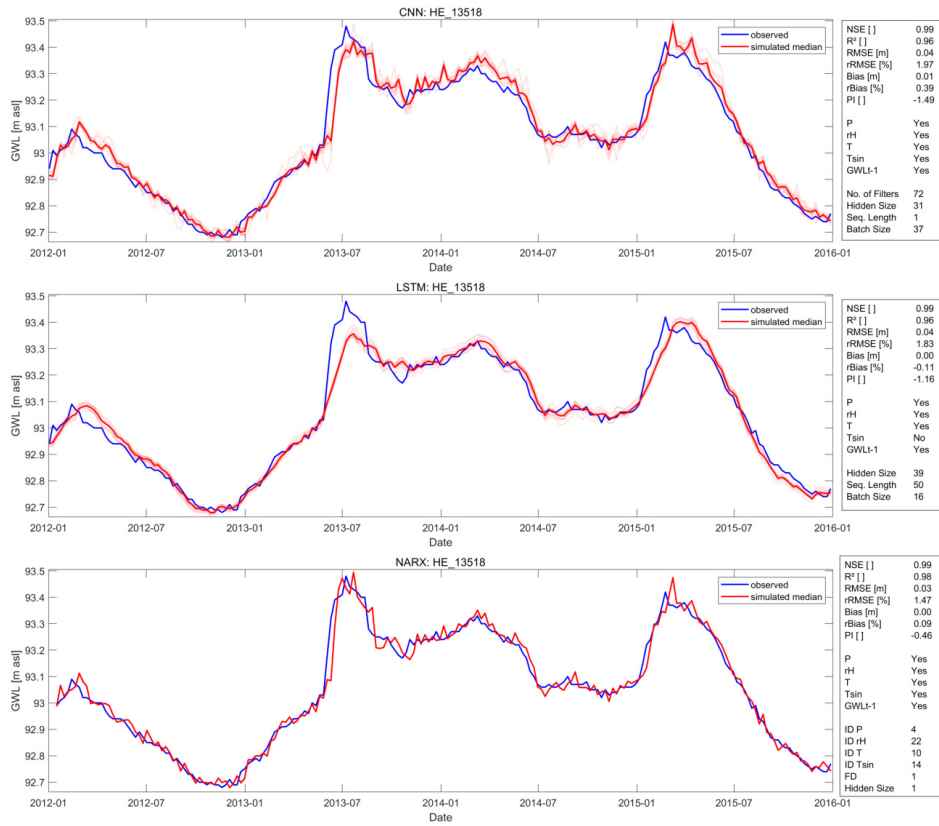

Figure S32: Seq2Val  $GWL_{t-1}$  test results for well HE\_13518

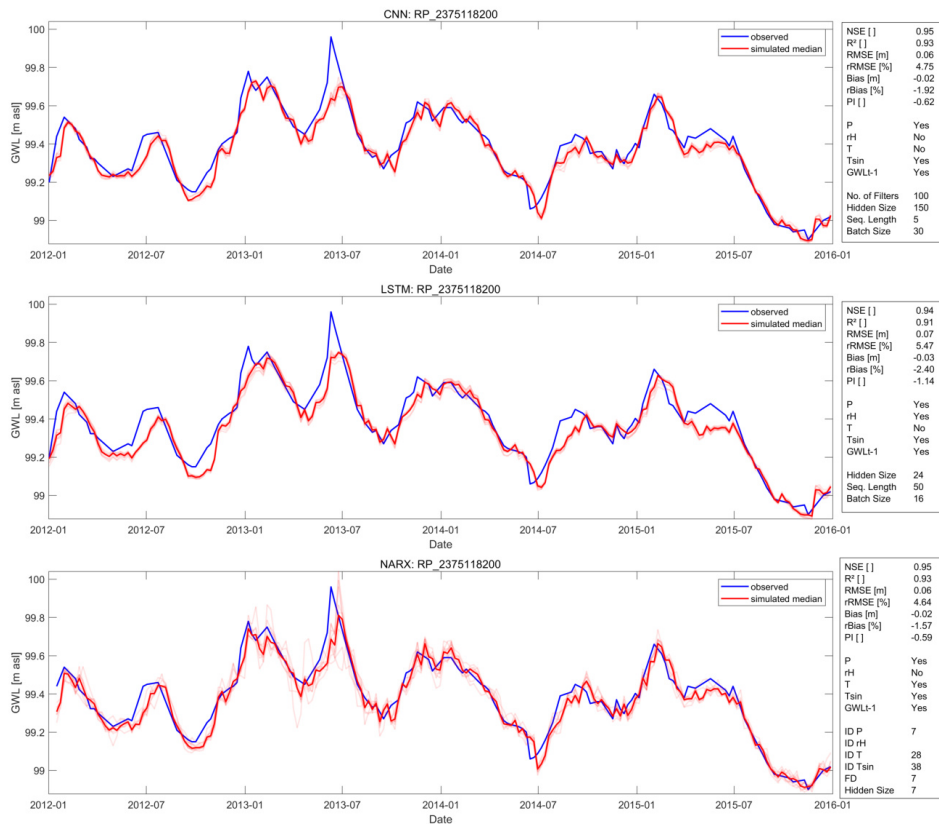

Figure S33: Seq2Val  $GWL_{t-1}$  test results for well RP\_2375118200

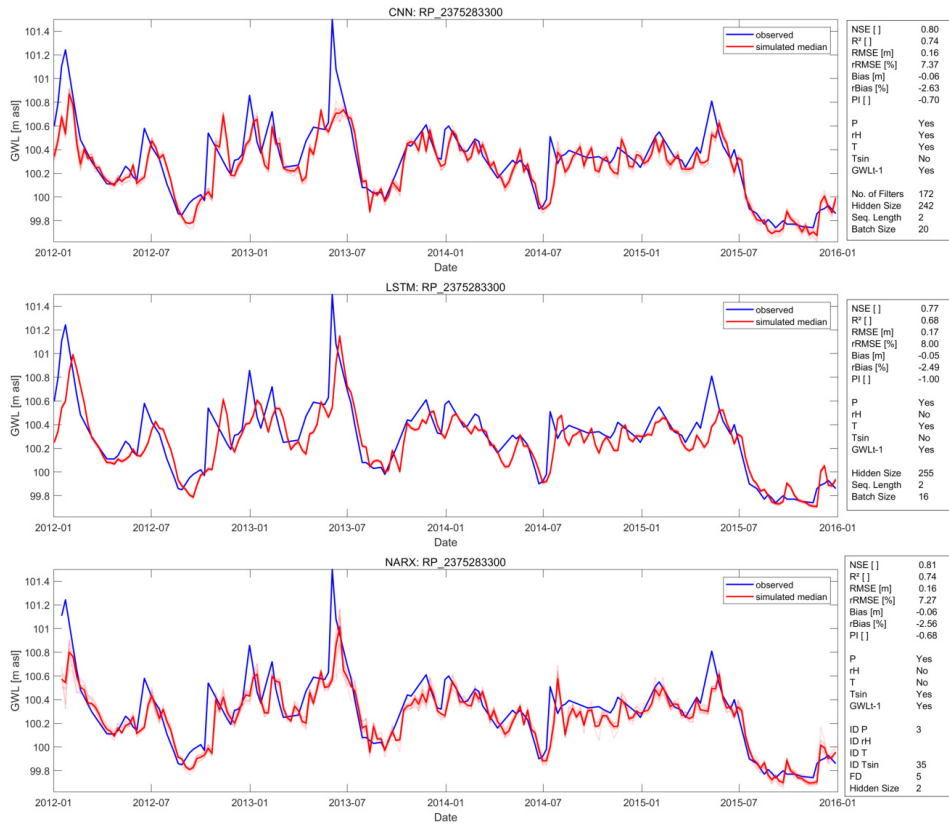

Figure S34: Seq2Val  $GWL_{t-1}$  test results for well RP\_2375283300

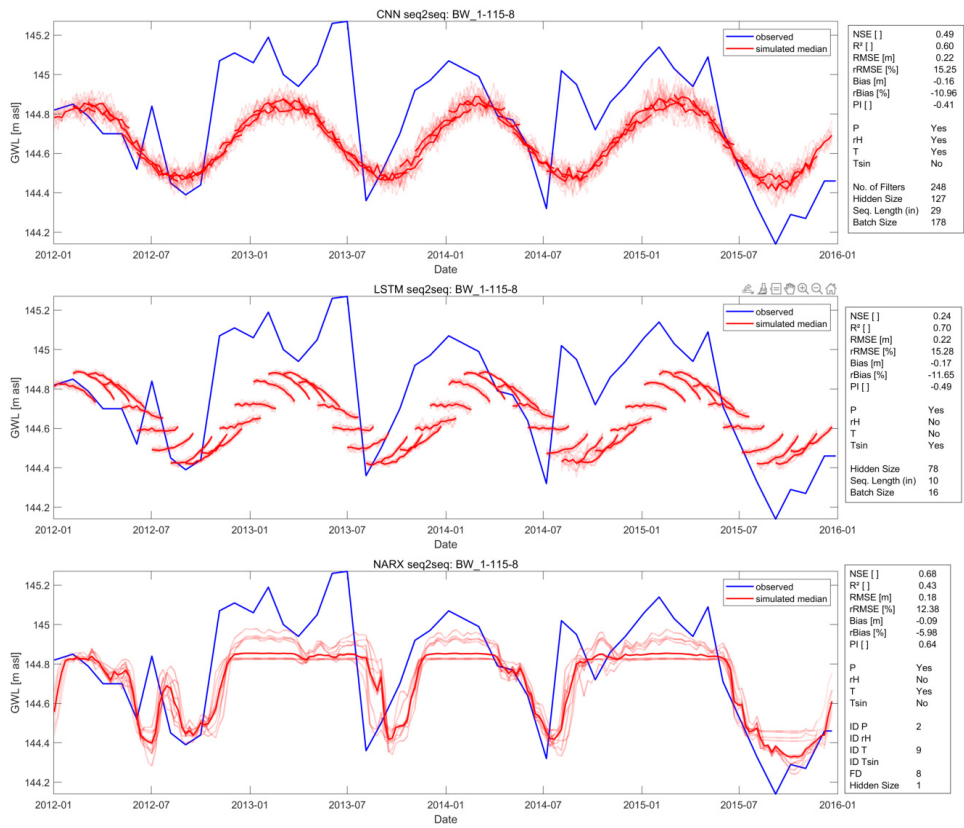

Figure S35: Seq2Seq test results for well BW\_1-115-8

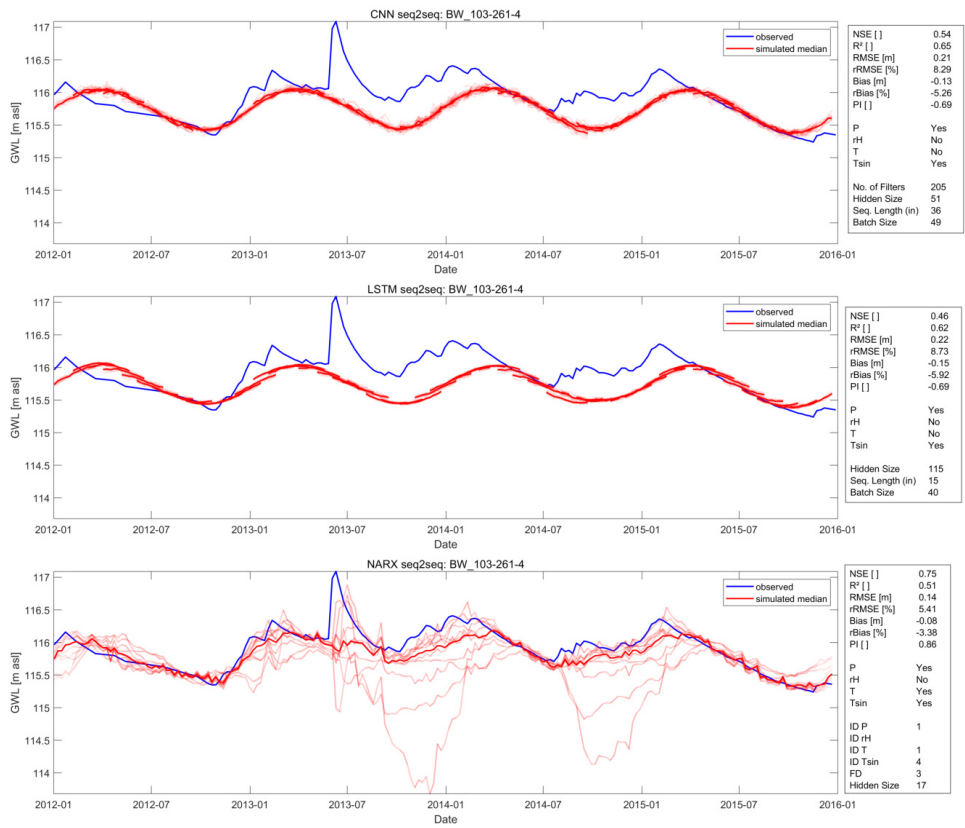

Figure S36: Seq2Seq test results for well BW\_103-261-4

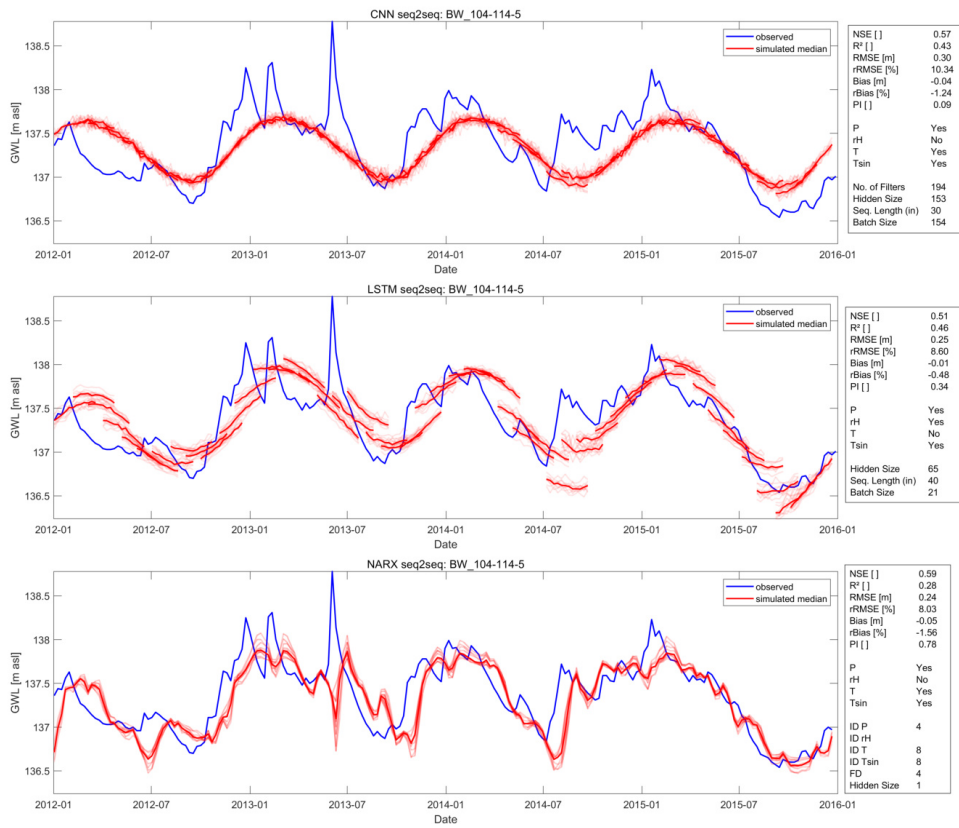

Figure S37: Seq2Seq test results for well BW\_104-114-5

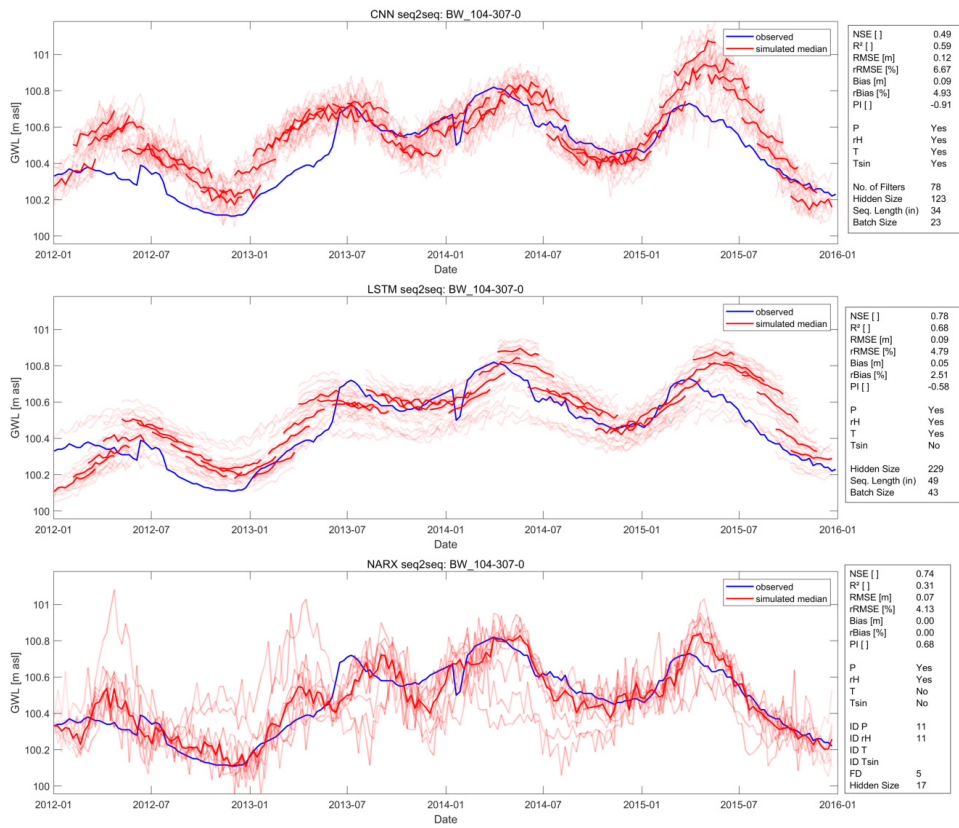

Figure S38: Seq2Seq test results for well BW\_104-307-0

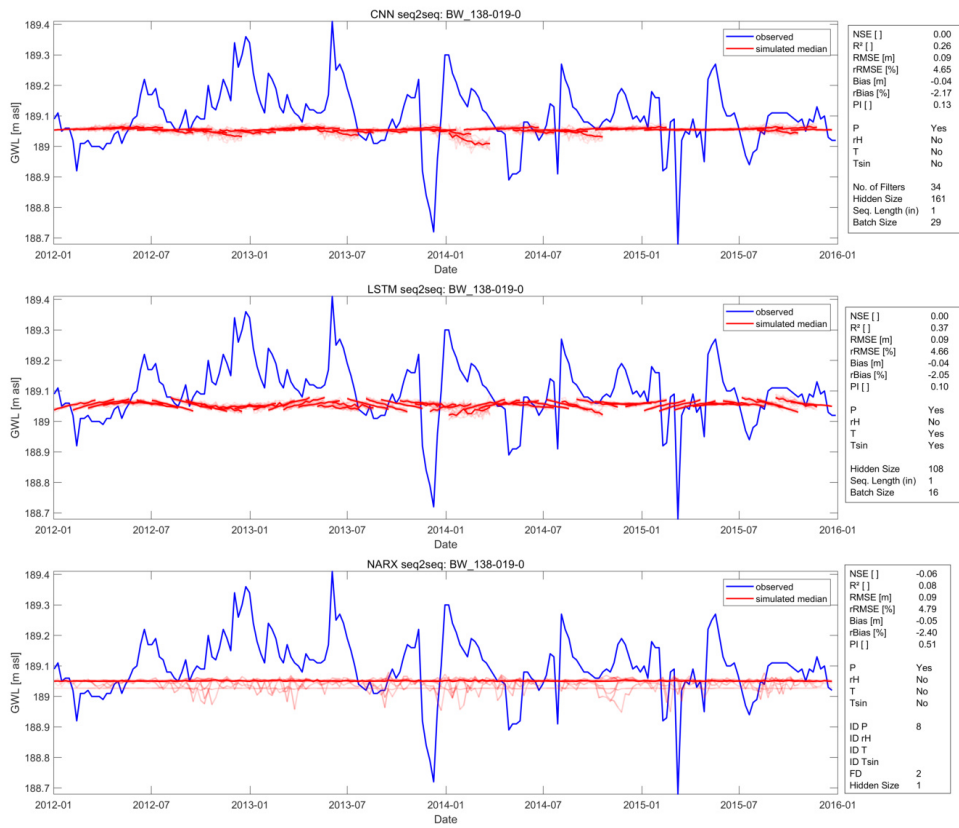

Figure S39: Seq2Seq test results for well BW\_138-019-0



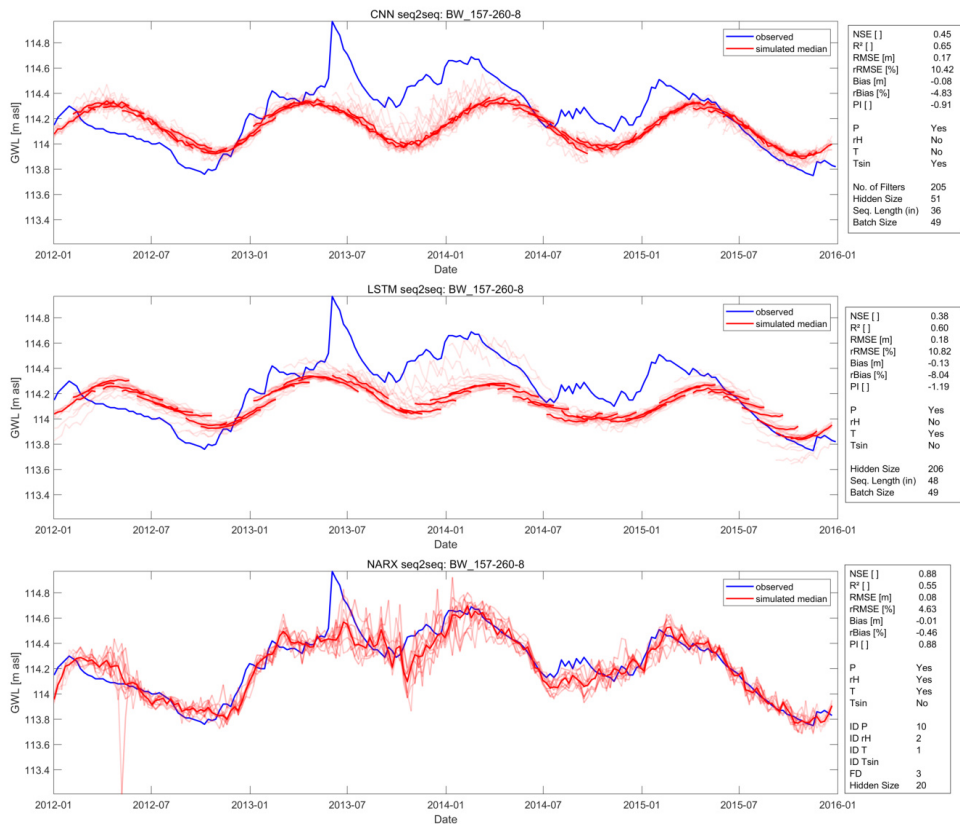

Figure S40: Seq2Seq test results for well BW\_157-260-8

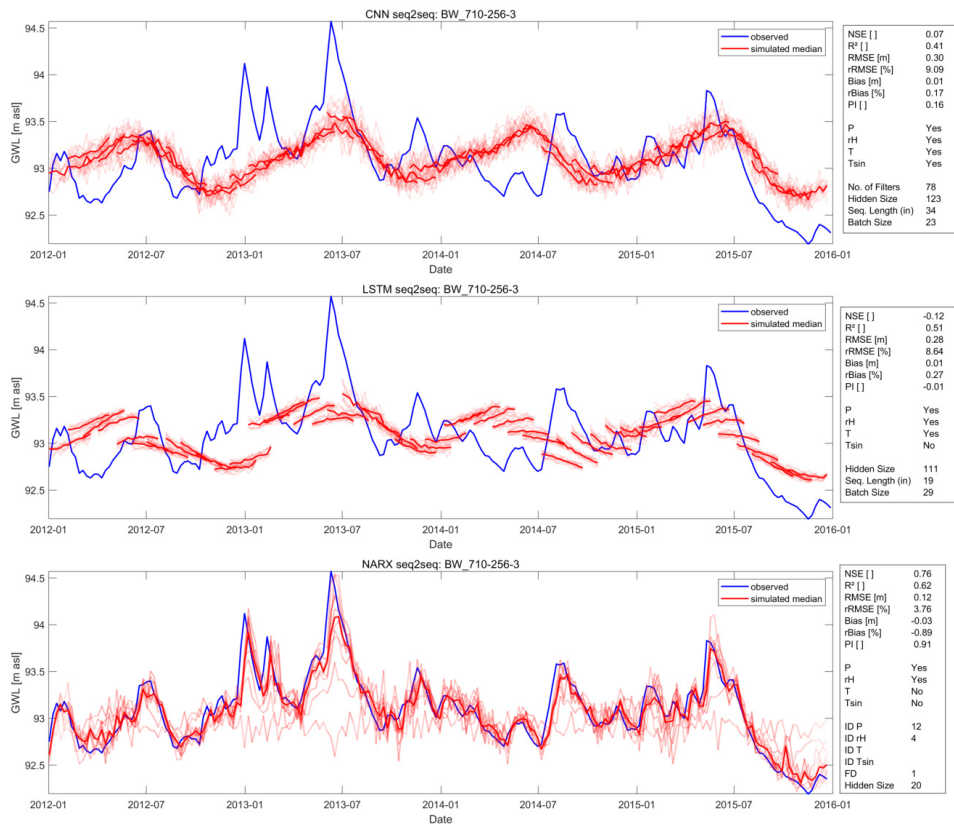

Figure S41: Seq2Seq test results for well BW\_710-256-3

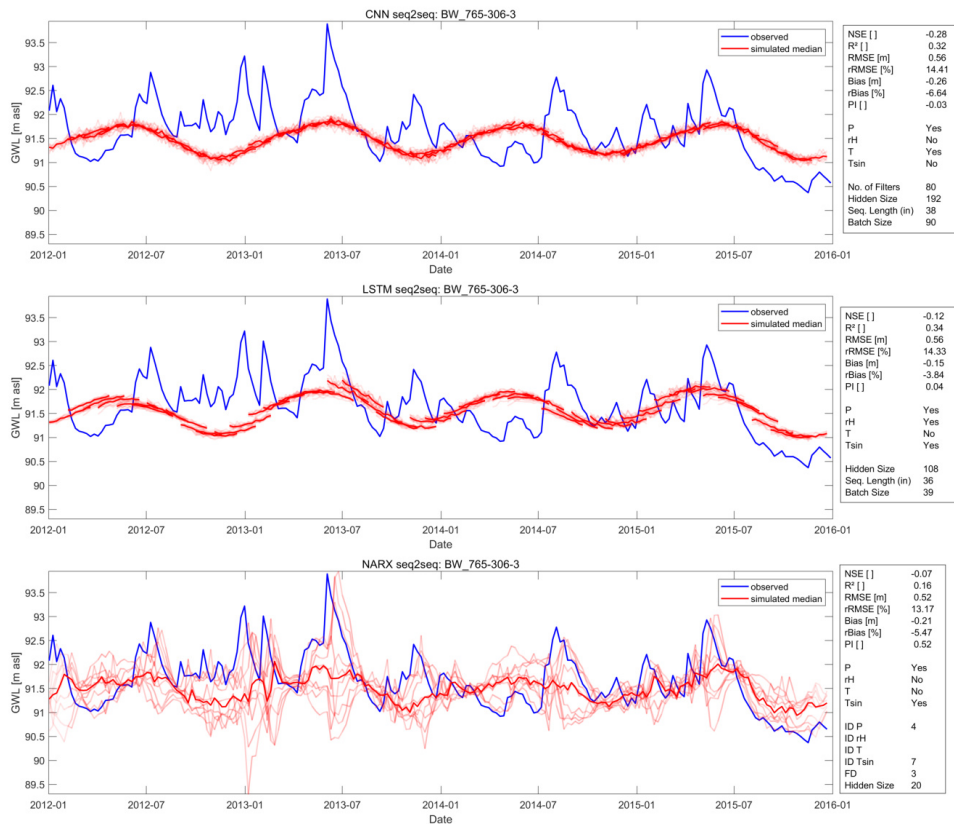

Figure S42: Seq2Seq test results for well BW\_765-306-3

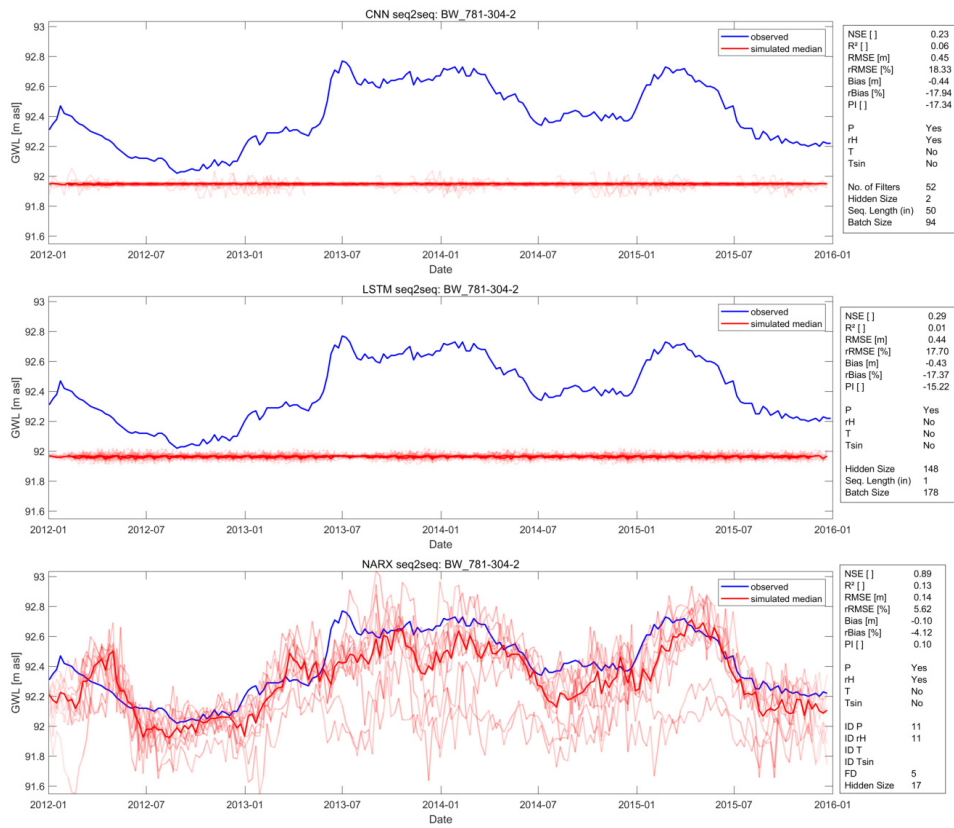

Figure S43: Seq2Seq test results for well BW\_781-304-2

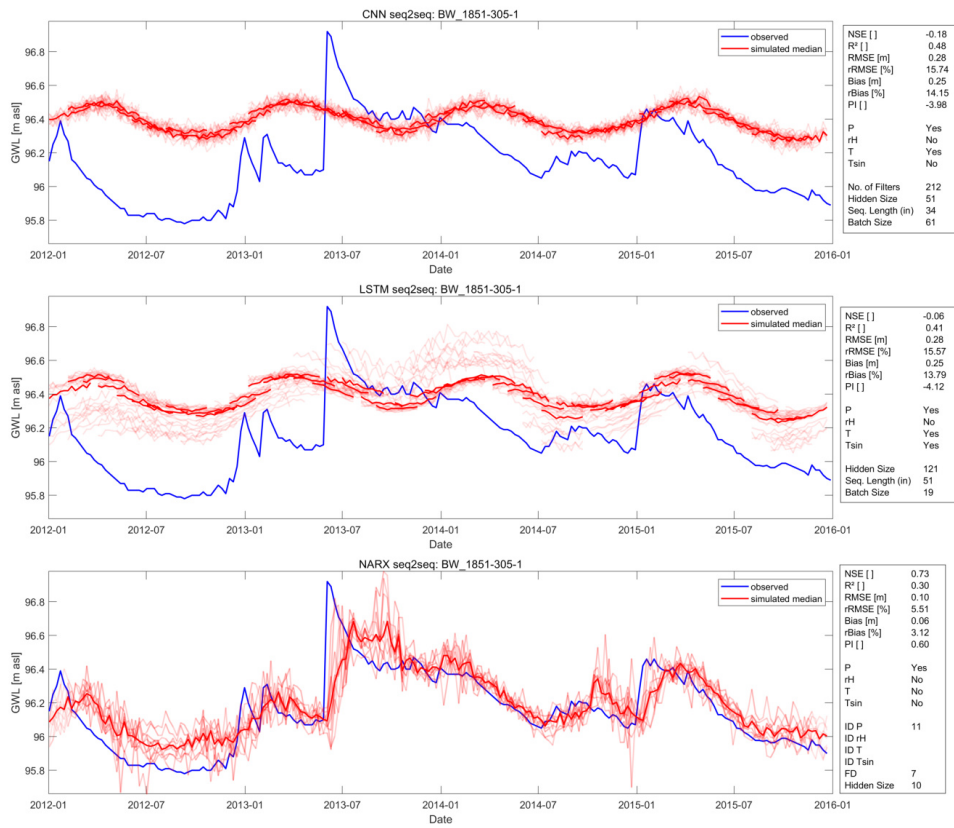

Figure S44: Seq2Seq test results for well BW\_1851-305-1

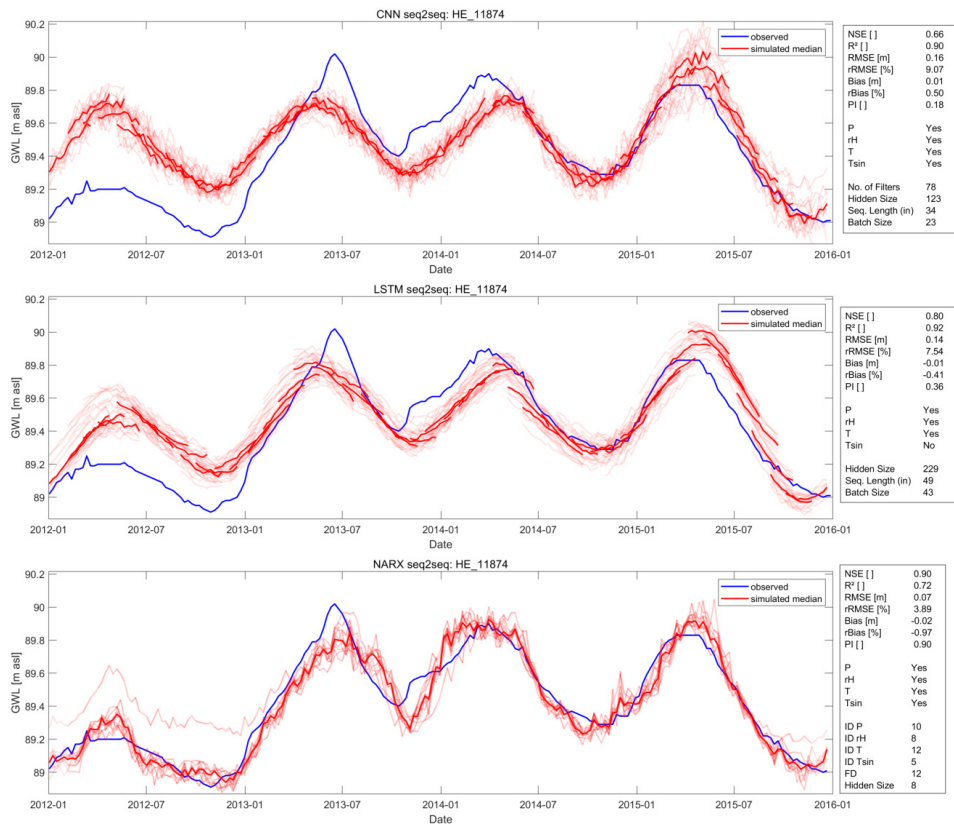

Figure S45: Seq2Seq test results for well HE\_11874

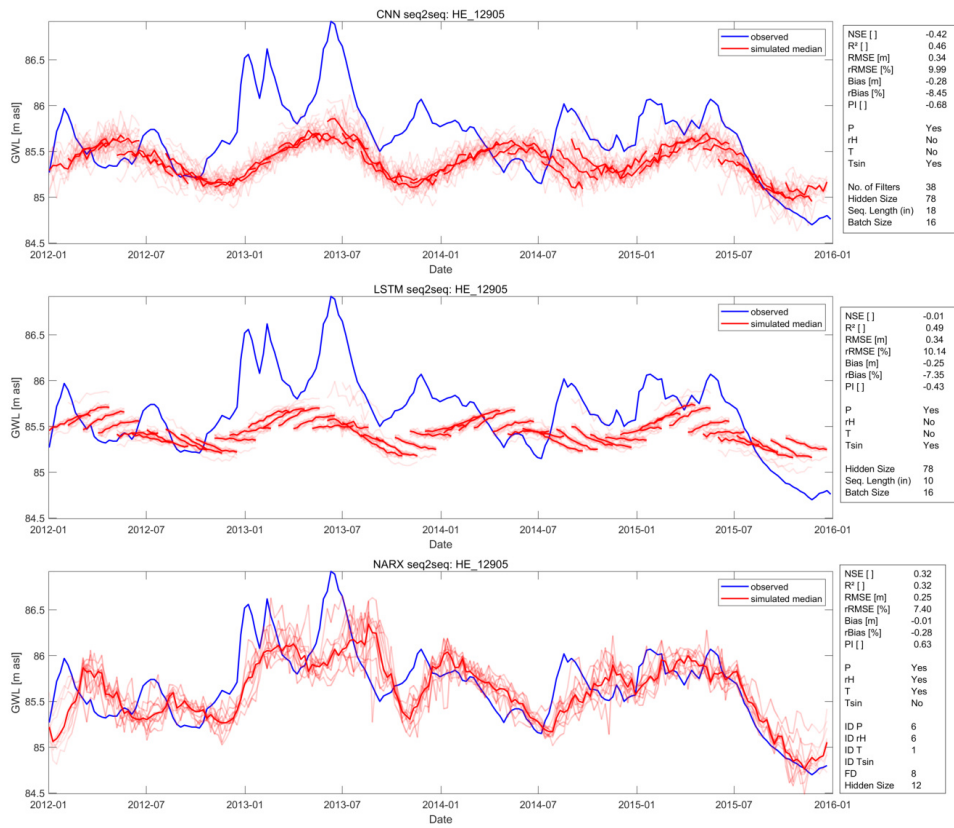

Figure S46: Seq2Seq test results for well HE\_12905

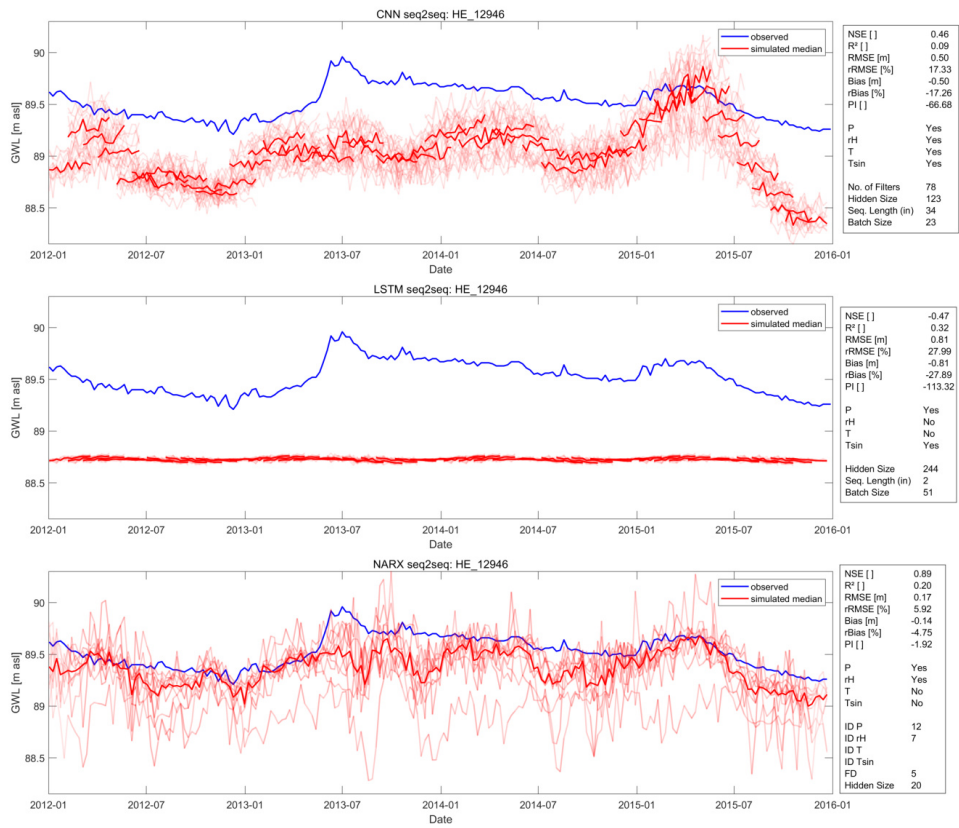

Figure S47: Seq2Seq test results for well HE\_12946



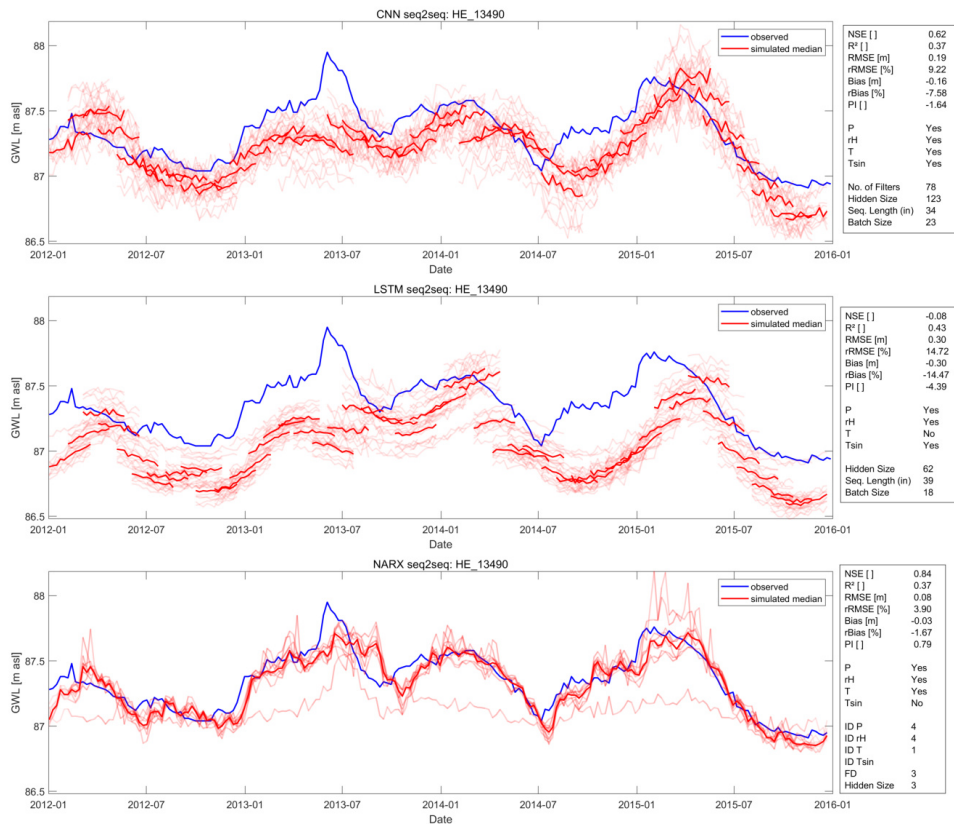

Figure S48: Seq2Seq test results for well HE\_13490

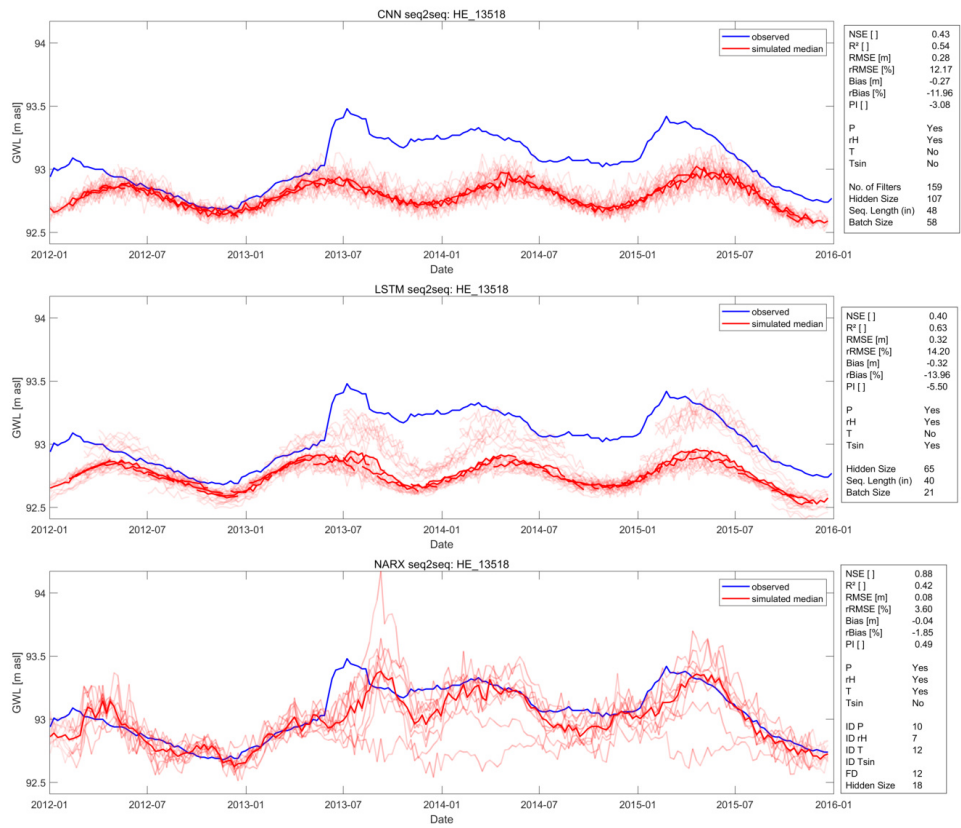

Figure S49: Seq2Seq test results for well HE\_13518

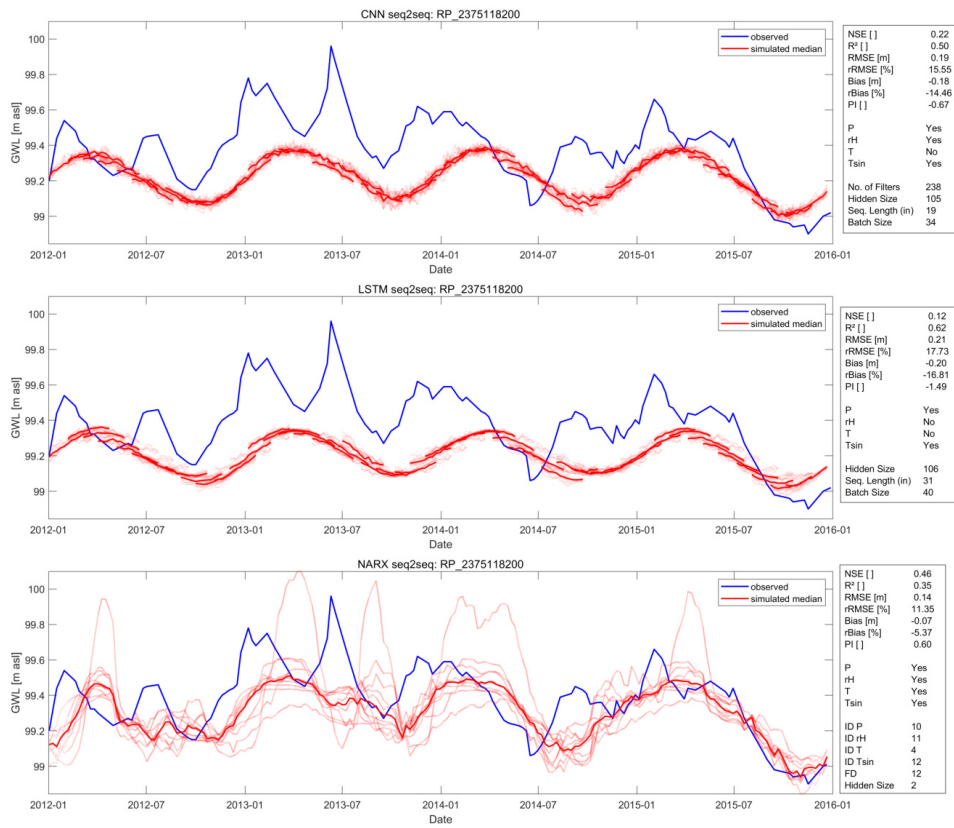

Figure S50: Seq2Seq test results for well RP\_2375118200

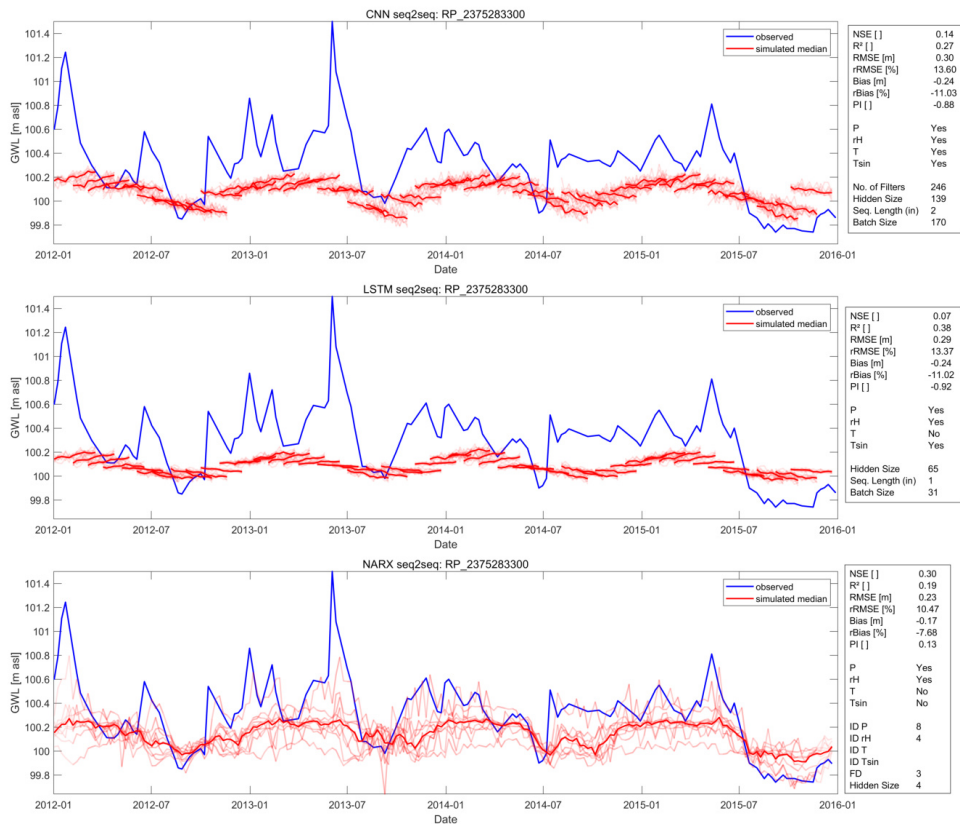

Figure S51: Seq2Seq test results for well RP\_2375283300

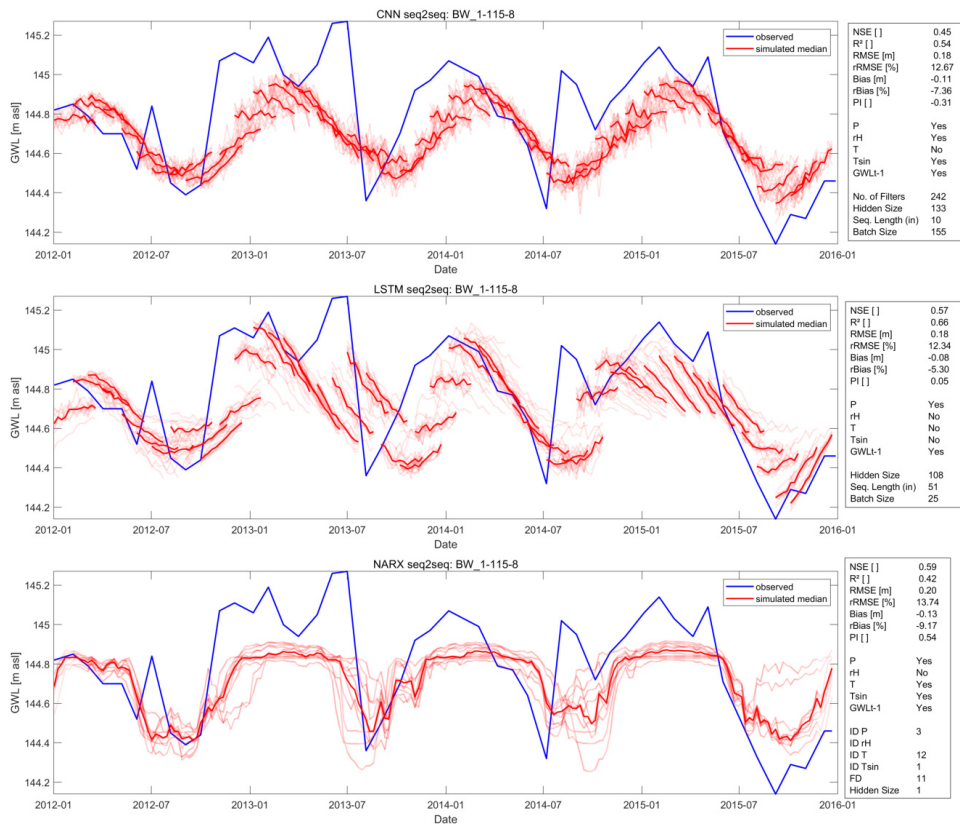

Figure S52: Seq2Seq  $GWL_{t-1}$  test results for well BW\_1-115-8

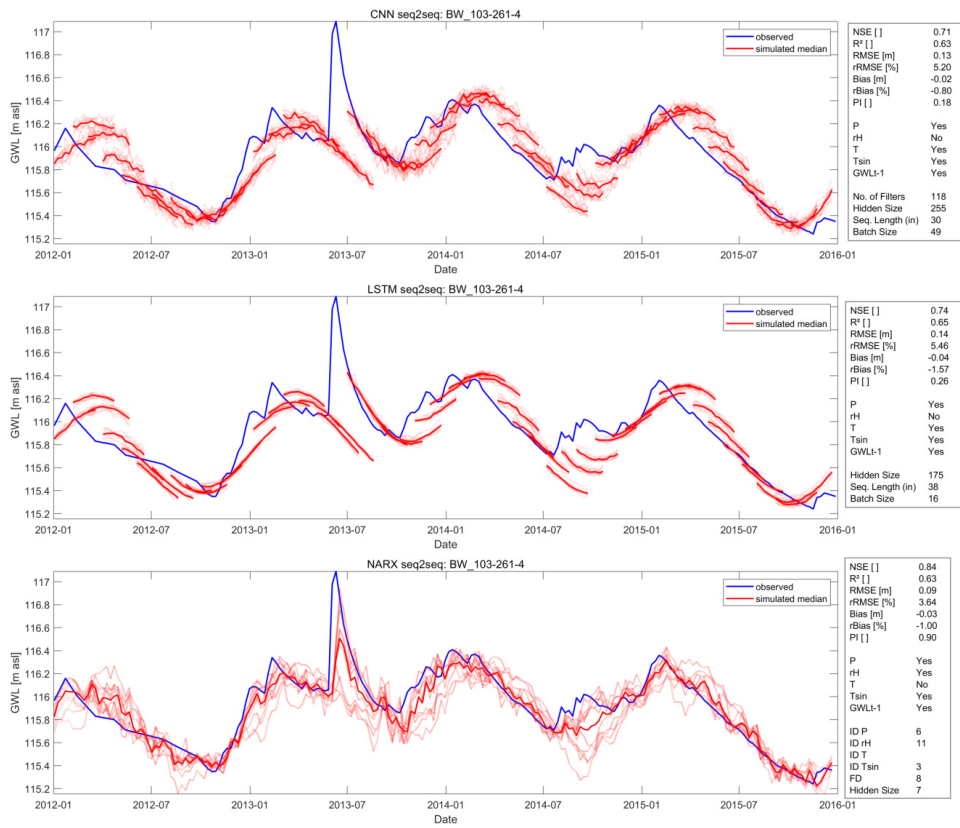

Figure S53: Seq2Seq  $GWL_{t-1}$  test results for well BW\_103-261-4

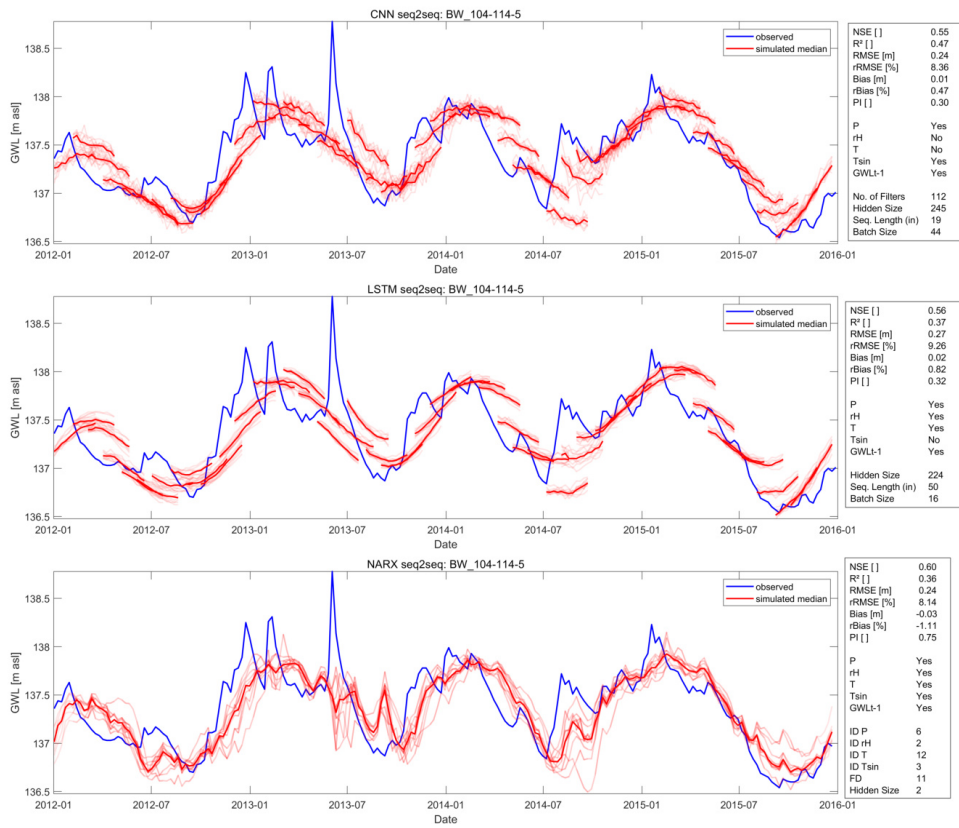

Figure S54: Seq2Seq  $GWL_{t-1}$  test results for well BW\_104-114-5

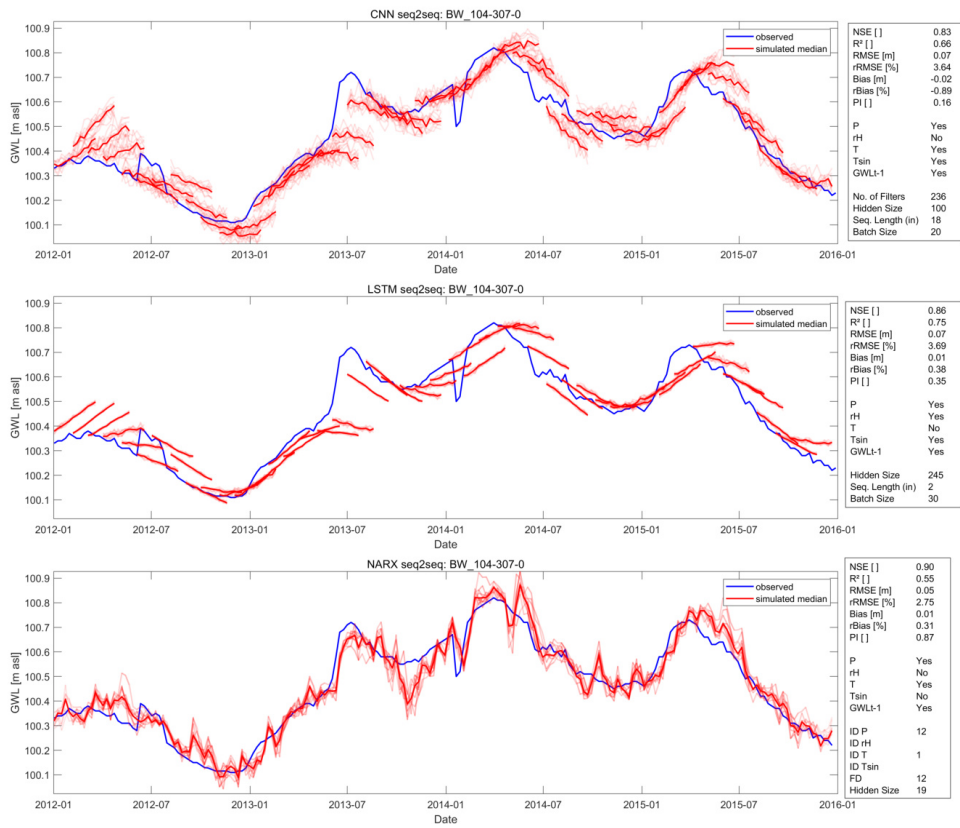

Figure S55: Seq2Seq  $GWL_{t-1}$  test results for well BW\_104-307-0



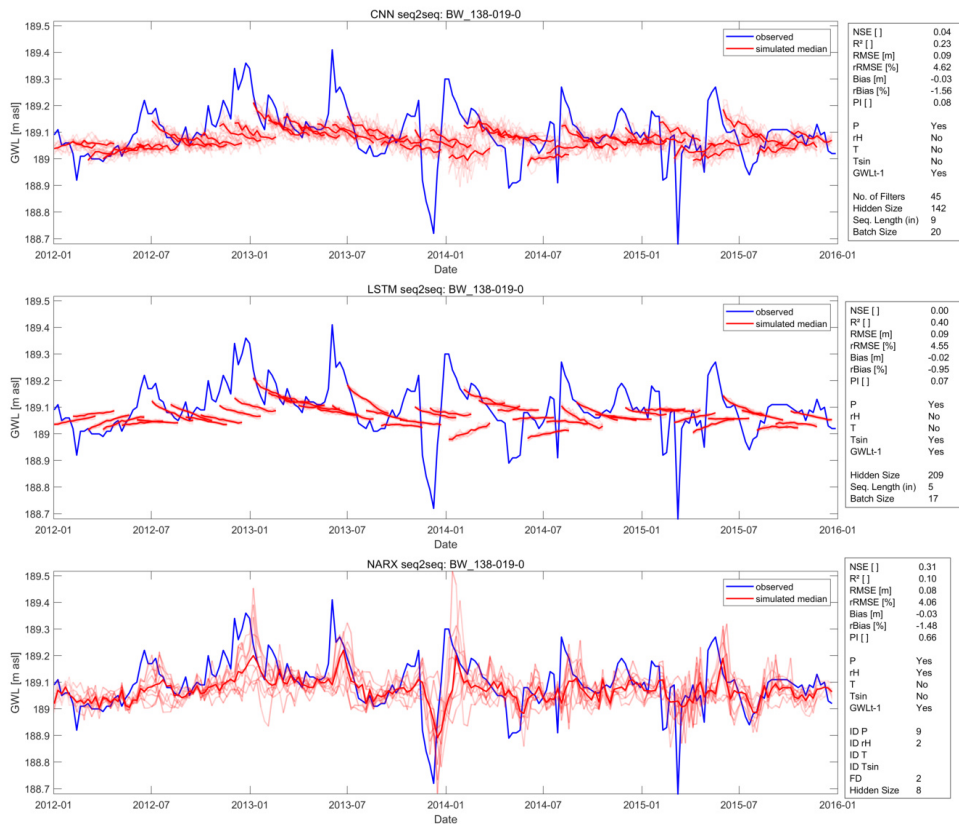

Figure S56: Seq2Seq  $GWL_{t-1}$  test results for well BW\_138-019-0

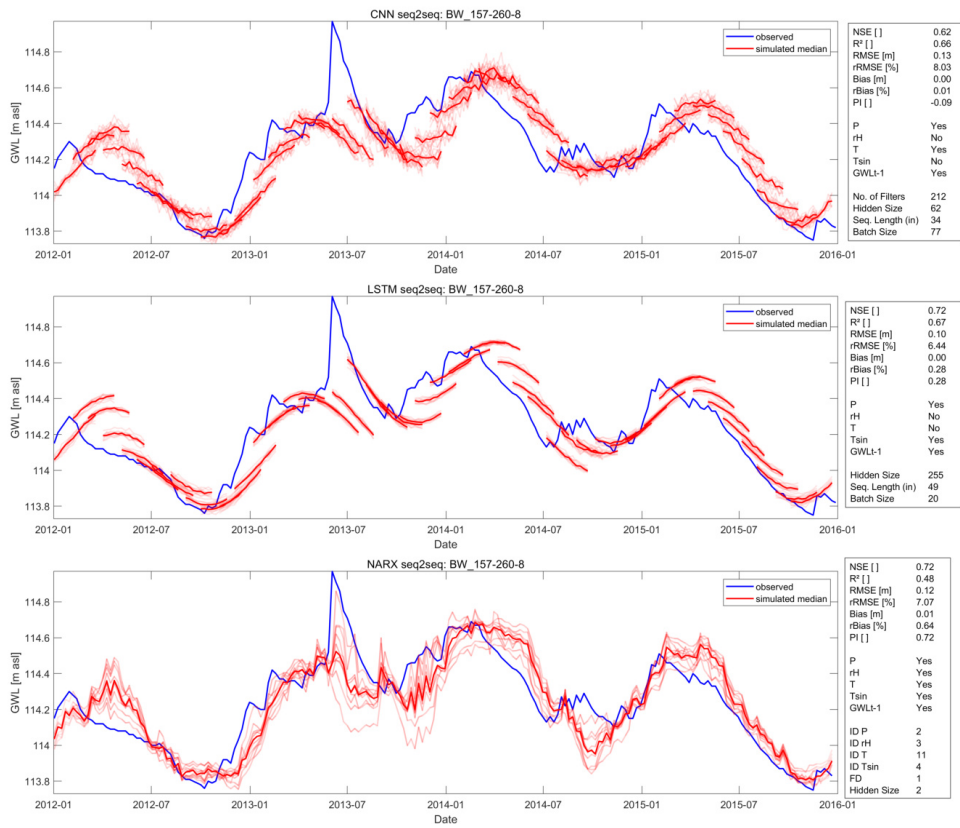

Figure S57: Seq2Seq  $GWL_{t-1}$  test results for well BW\_157-260-8

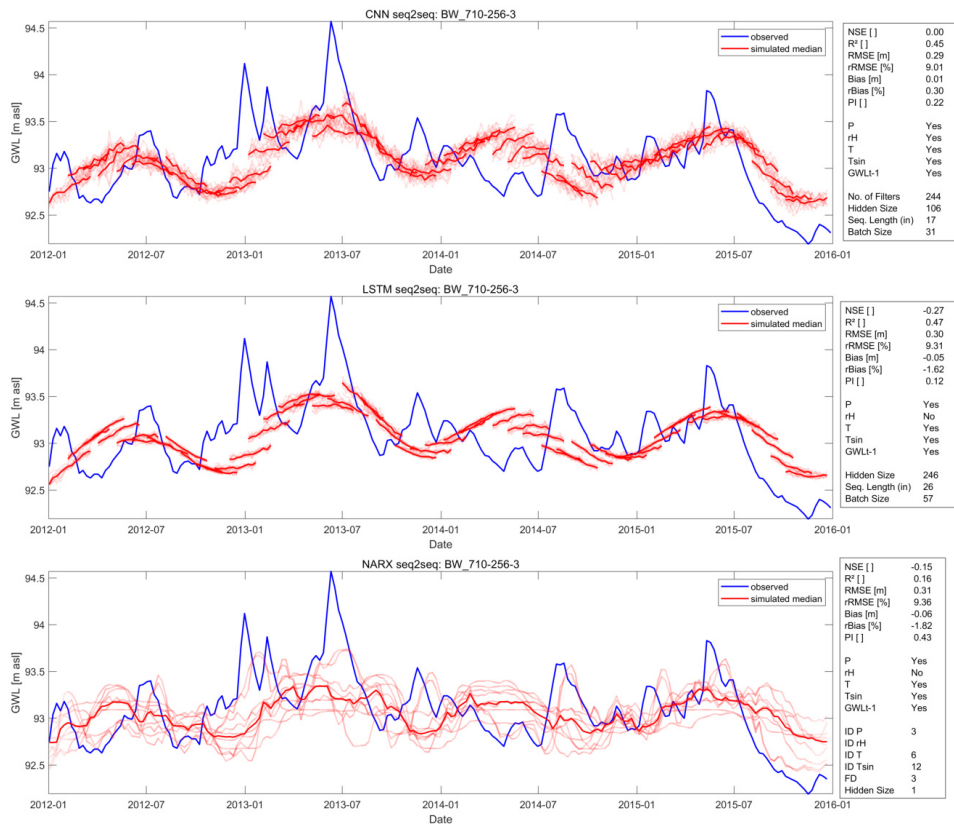

Figure S58: Seq2Seq  $GWL_{t-1}$  test results for well BW\_710-256-3

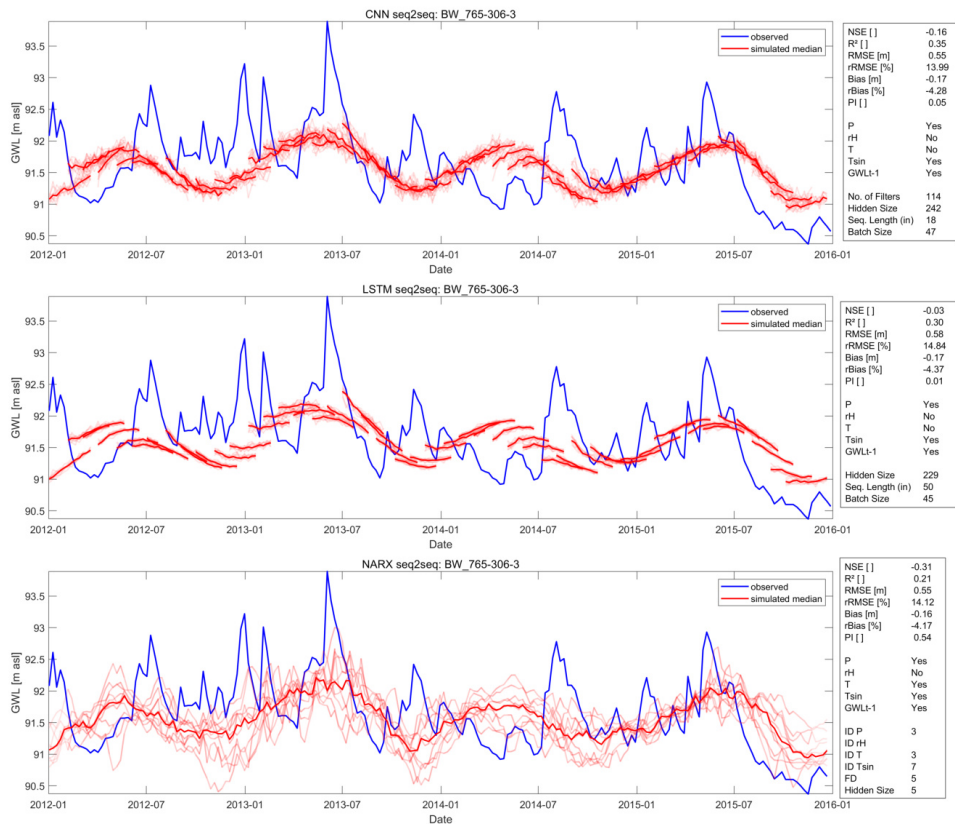

Figure S59: Seq2Seq  $GWL_{t-1}$  test results for well BW\_765-306-3

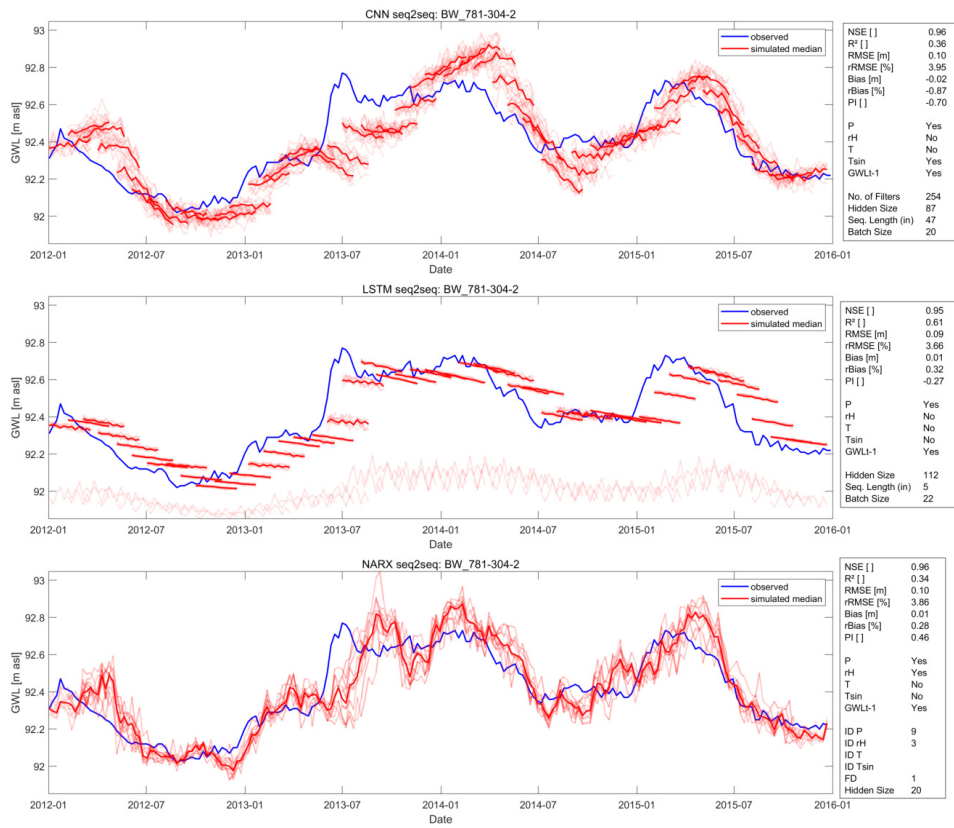

Figure S60: Seq2Seq  $GWL_{t-1}$  test results for well BW\_781-304-2

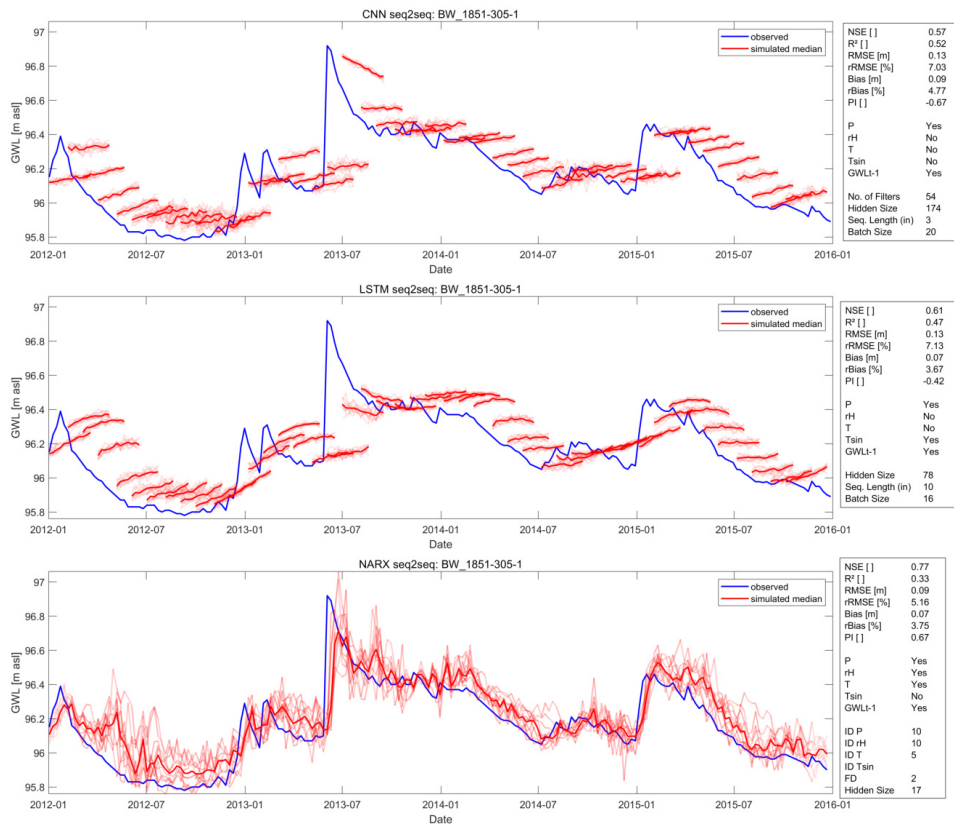

Figure S61: Seq2Seq  $GWL_{t-1}$  test results for well BW\_1851-305-1

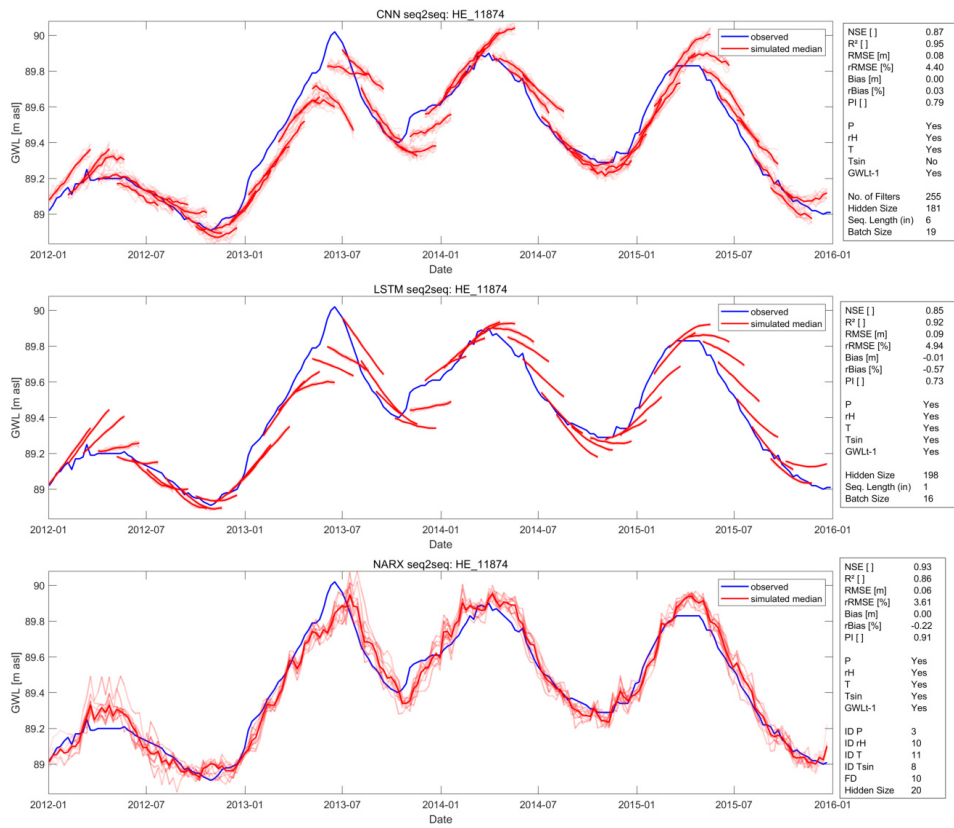

Figure S62: Seq2Seq  $GWL_{t-1}$  test results for well HE\_11874

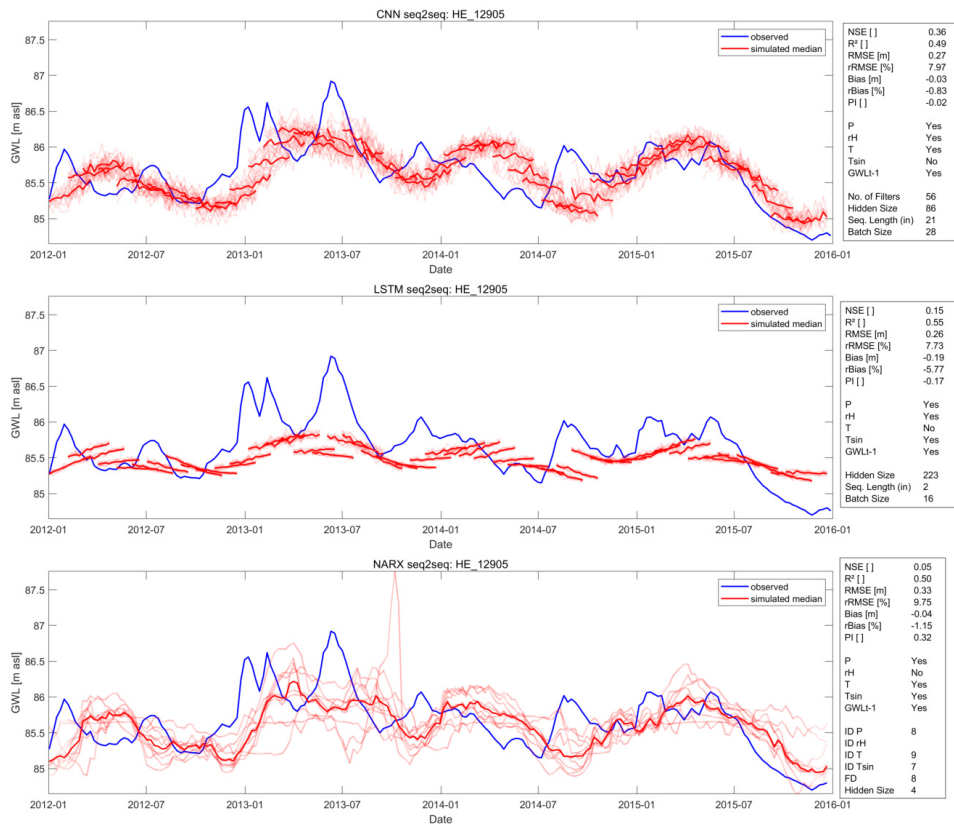

Figure S63: Seq2Seq  $GWL_{t-1}$  test results for well HE\_12905



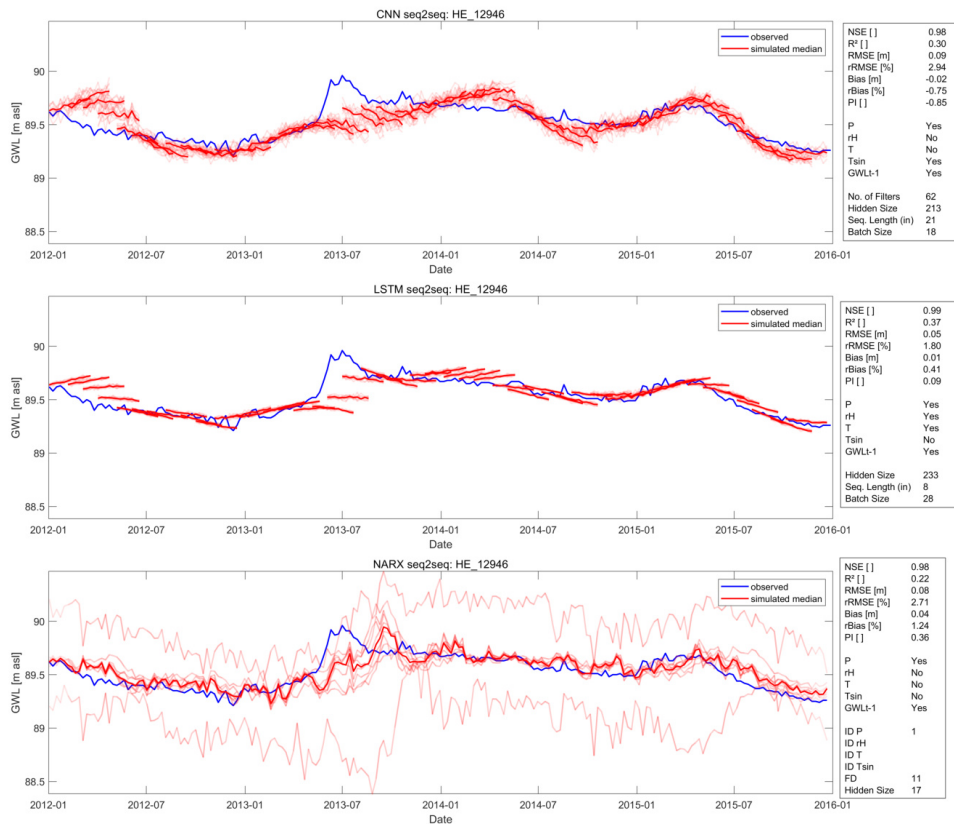

Figure S64: Seq2Seq  $GWL_{t-1}$  test results for well HE\_12946

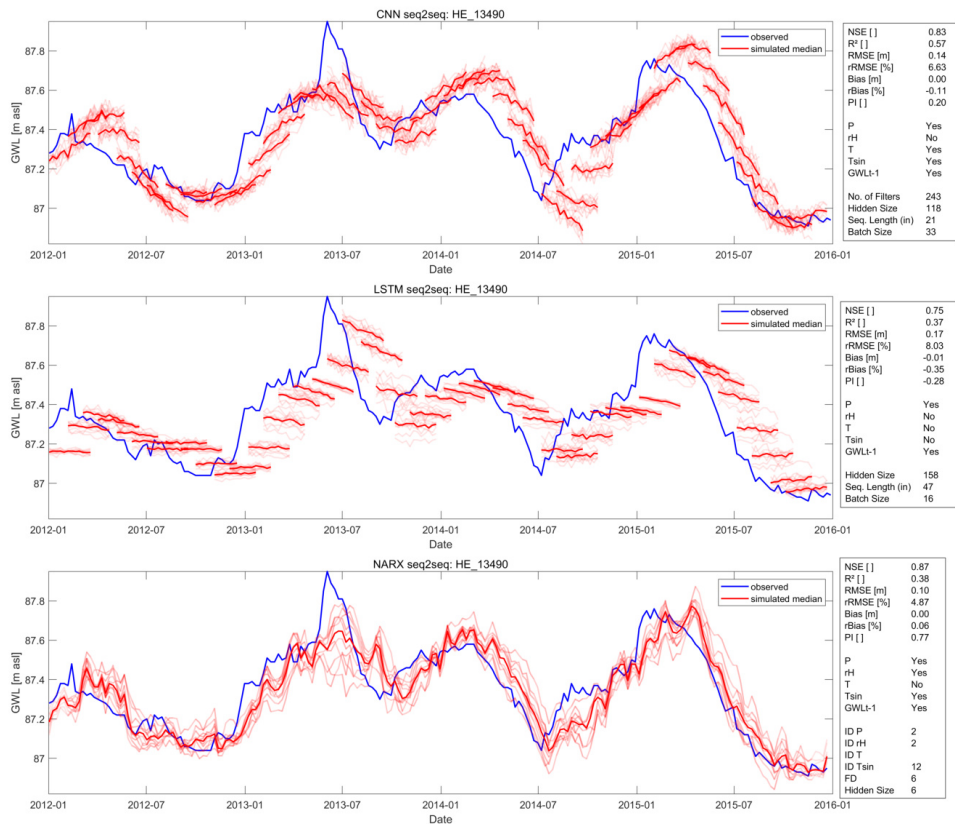

Figure S65: Seq2Seq  $GWL_{t-1}$  test results for well HE\_13490

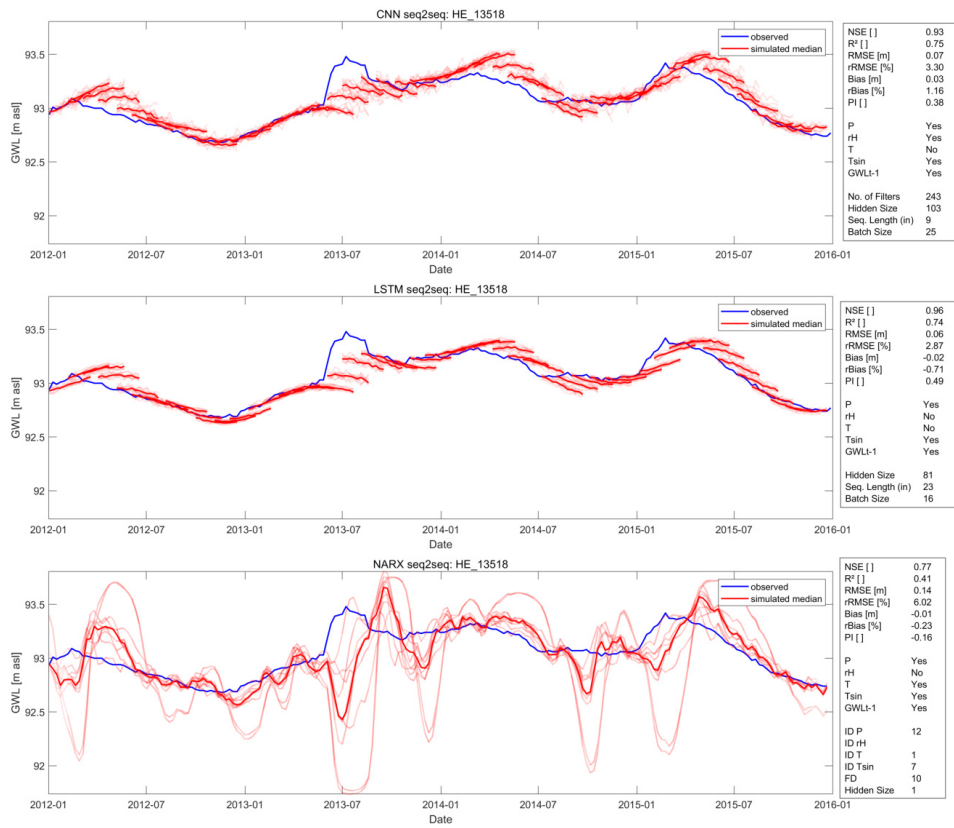

Figure S66: Seq2Seq  $GWL_{t-1}$  test results for well HE\_13518

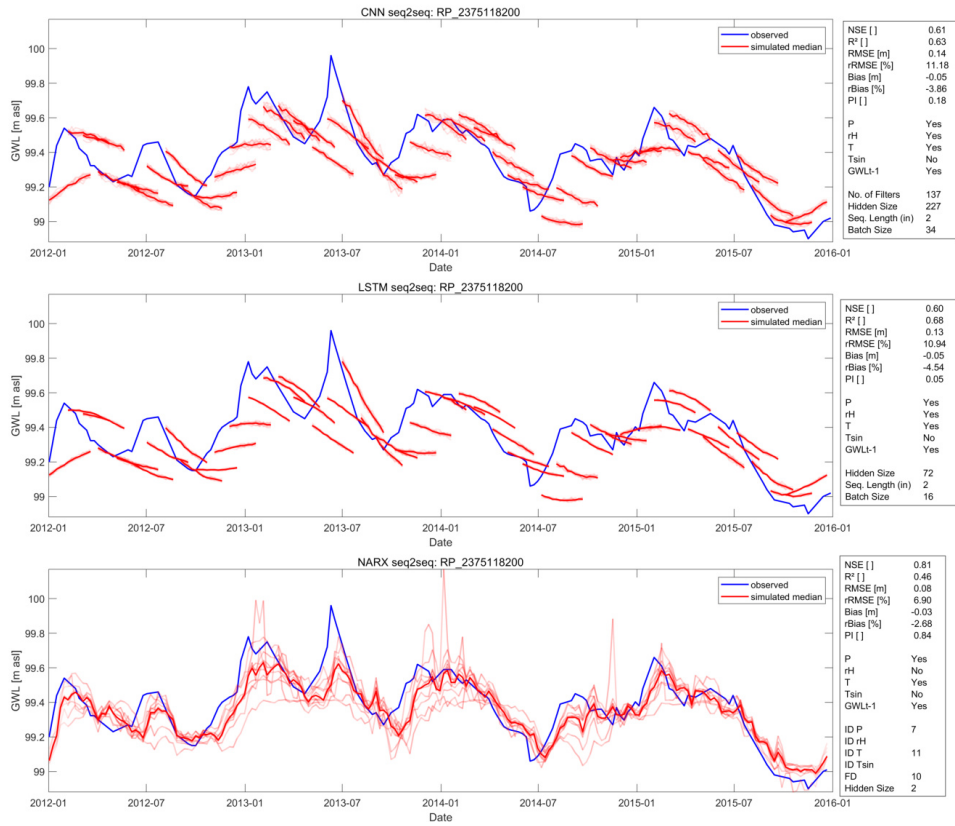

Figure S67: Seq2Seq  $GWL_{t-1}$  test results for well RP\_2375118200

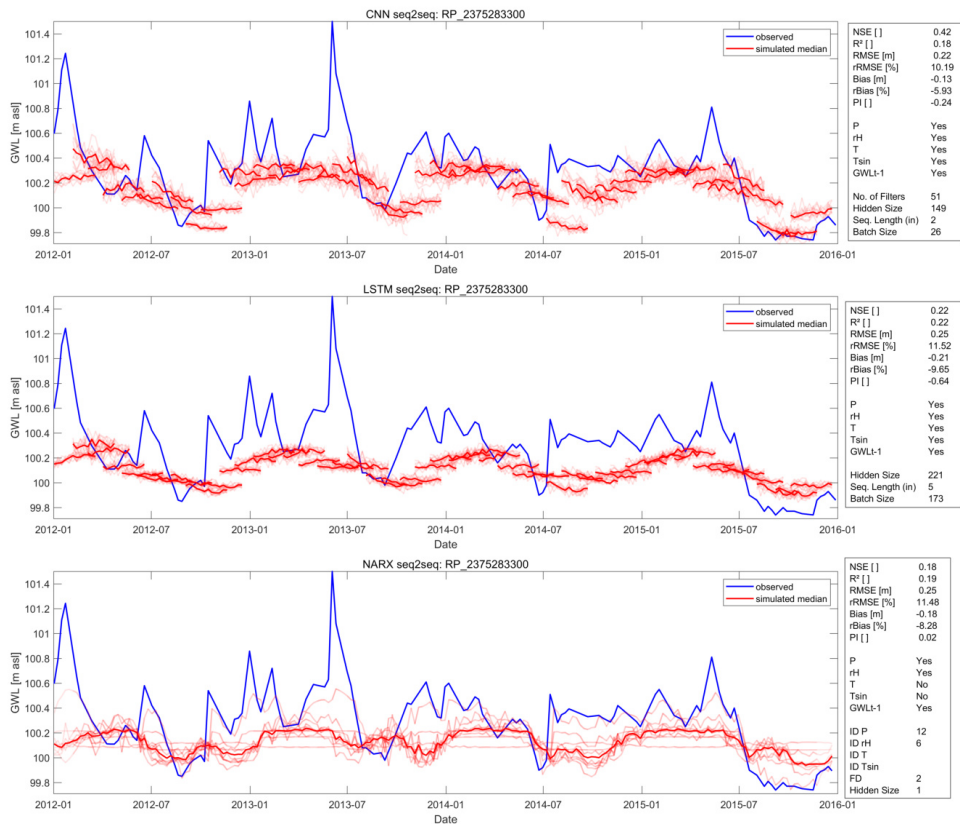

Figure S68: Seq2Seq  $GWL_{t-1}$  test results for well RP\_2375283300

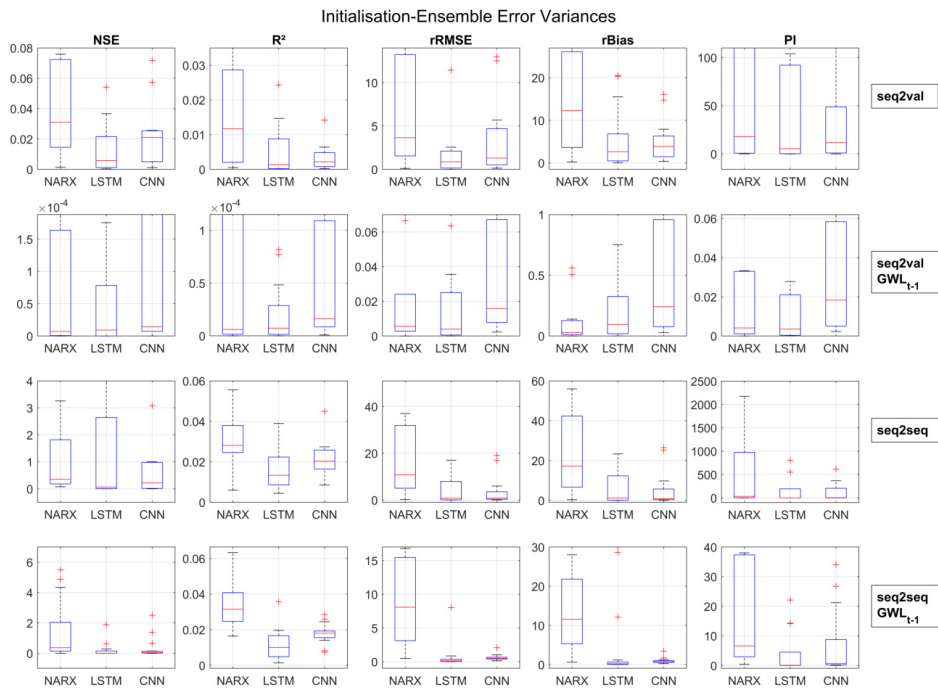

Figure S69: Error Variance of Initialization Ensemble Members

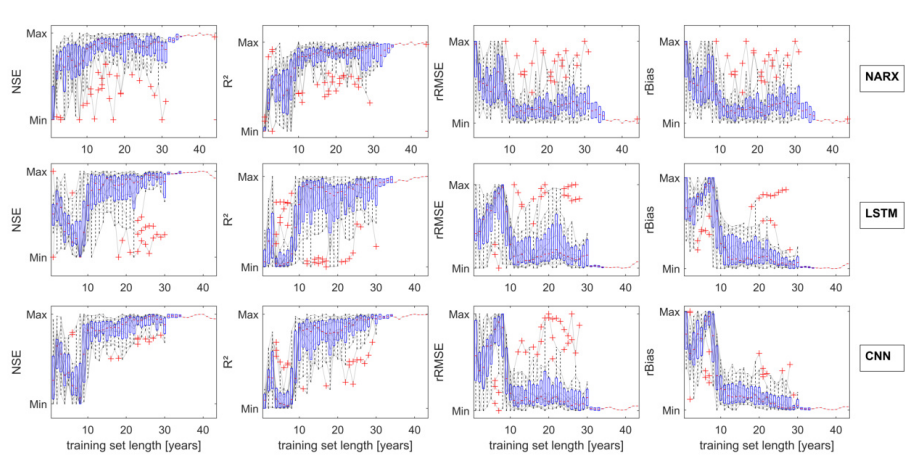

Figure S70: Influence of the available amount of training data on seq2val model performance based on meteorological inputs.

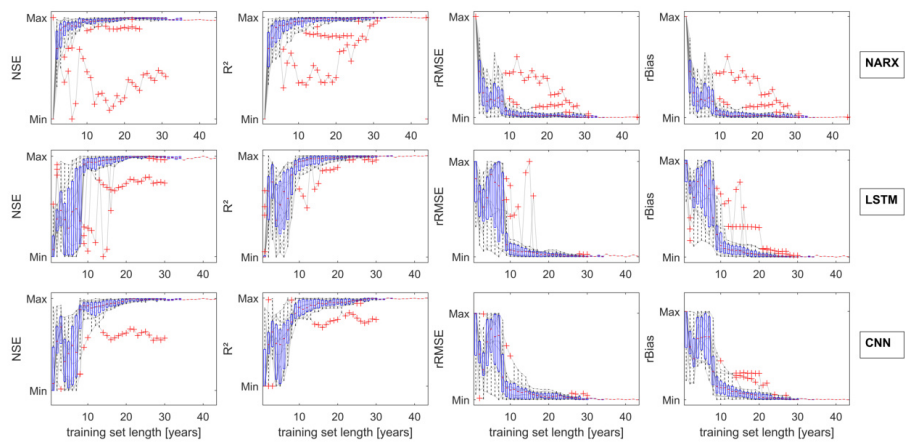

Figure S71: Influence of the available amount of training data on seq2val model performance based on meteorological inputs and past groundwater levels.

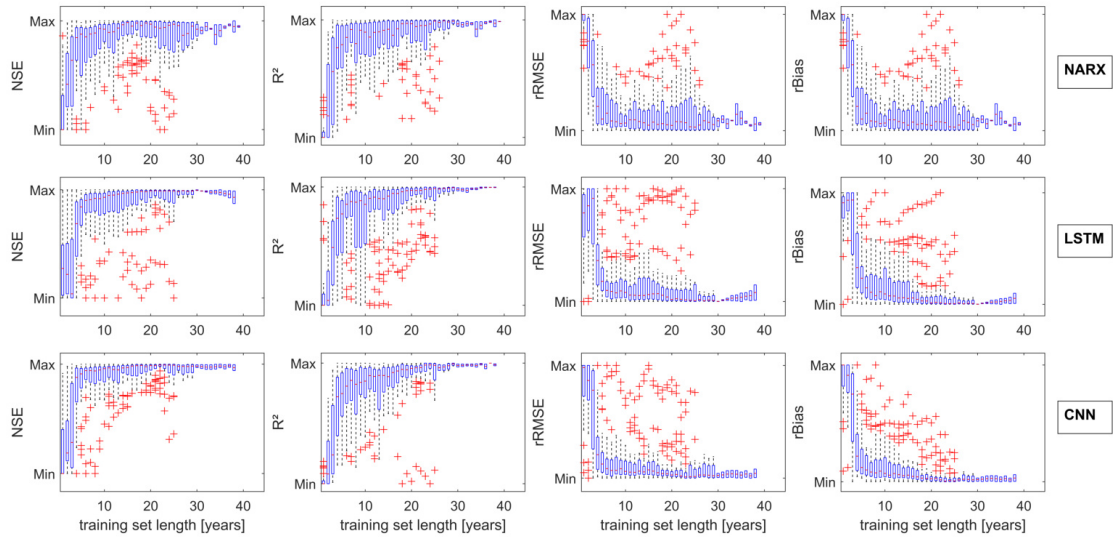

Figure S72: Influence of the available amount of training data on all seq2val model performance with training ending in 2007 instead of 2012

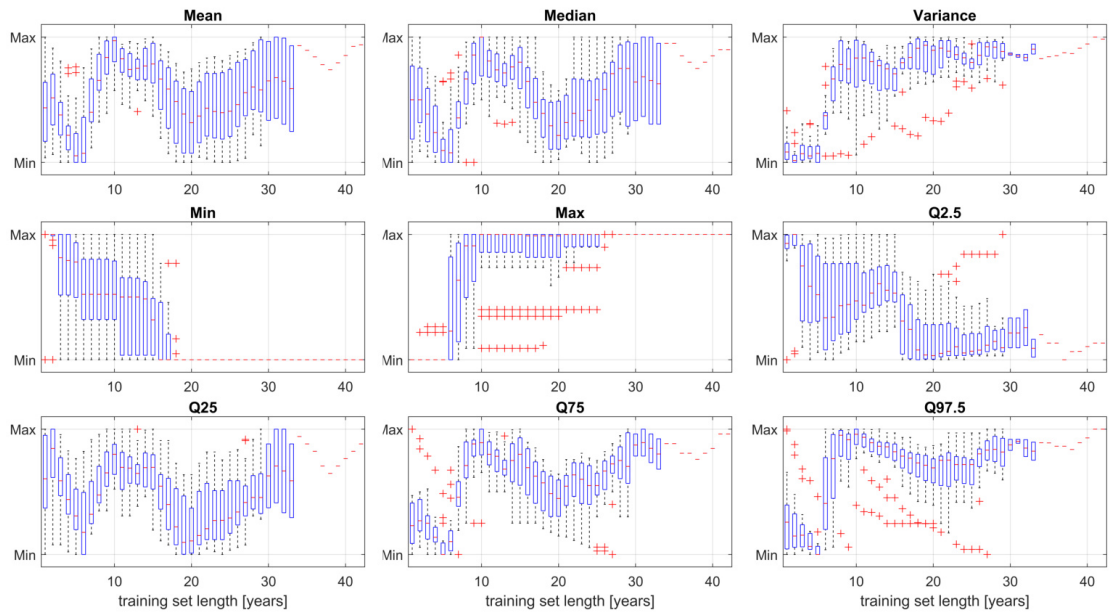

Figure S73: Development of several statistic measures with yearly expanding time series length from 2012 on backwards (Q: Quantile).



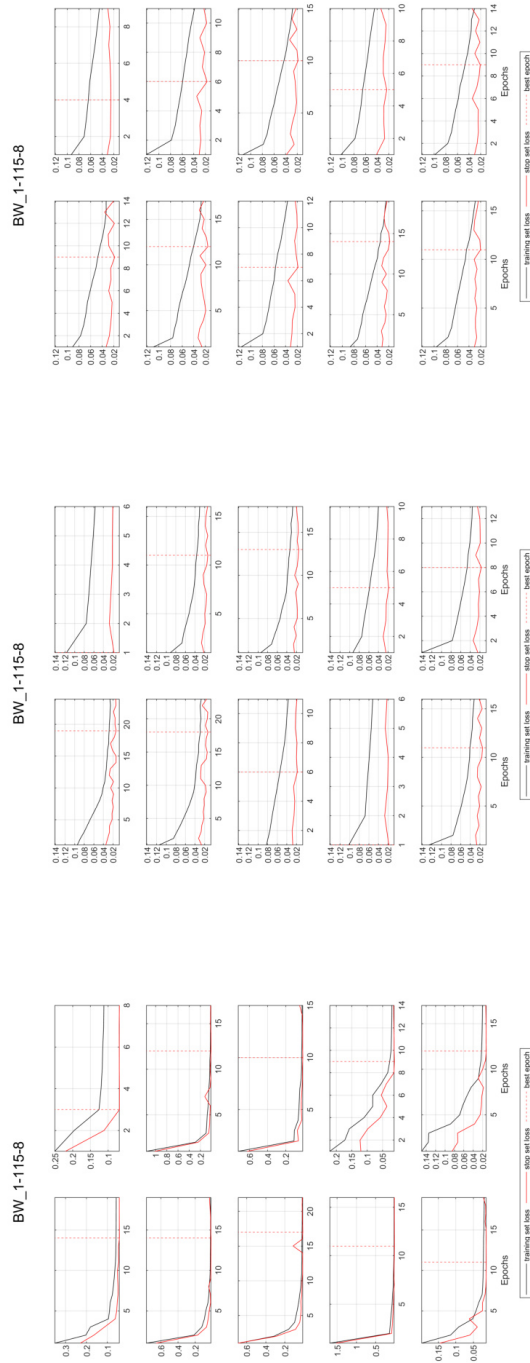

Figure S74: Seq2Val training and early stopping loss (MSE) for all 10 model initializations for well BW\_1-115-8: NARX (top), LSTM (middle), CNN (bottom)

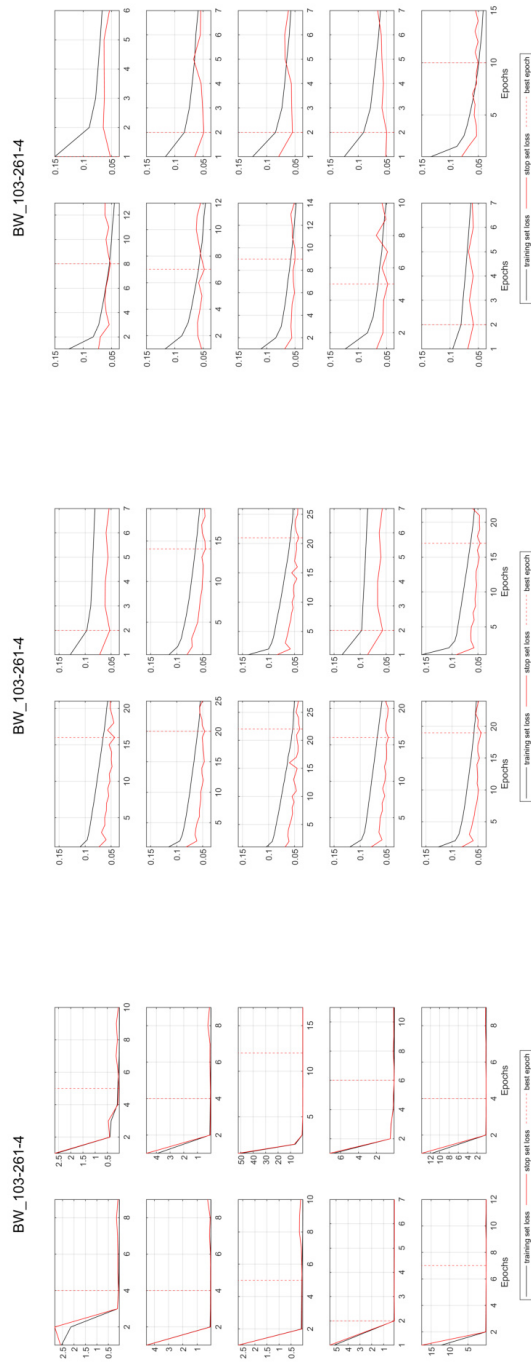

Figure S75: Seq2Val training and early stopping loss (MSE) for all 10 model initializations for well BW\_103-261-4: NARX (top), LSTM (middle), CNN (bottom)

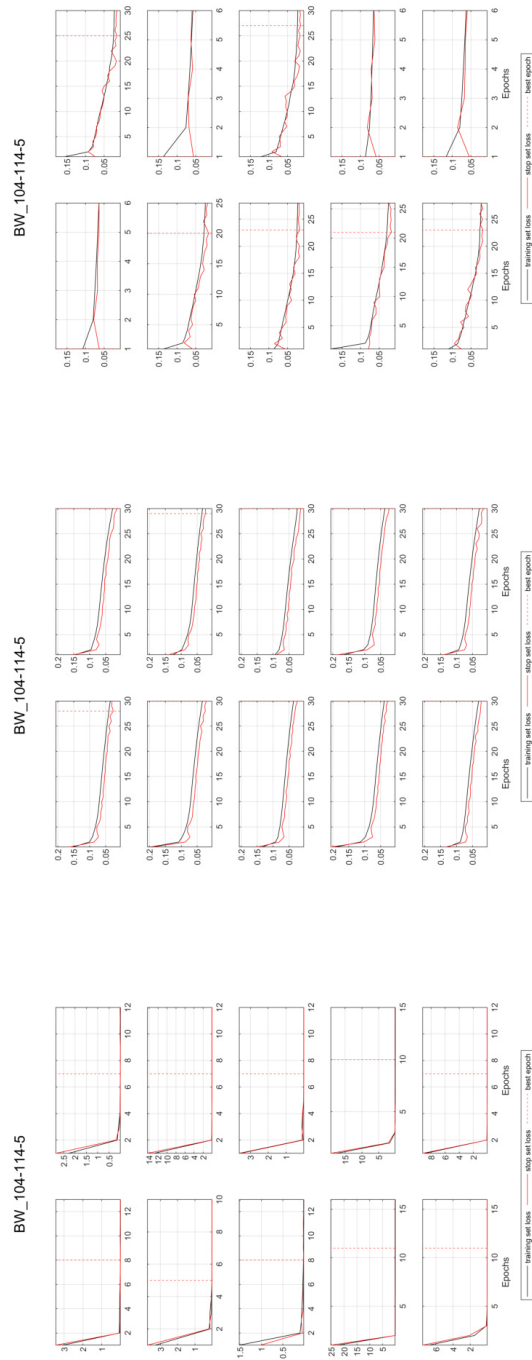

Figure S76: Seq2Val training and early stopping loss (MSE) for all 10 model initializations for well BW\_104-114-5: NARX (top), LSTM (middle), CNN (bottom)

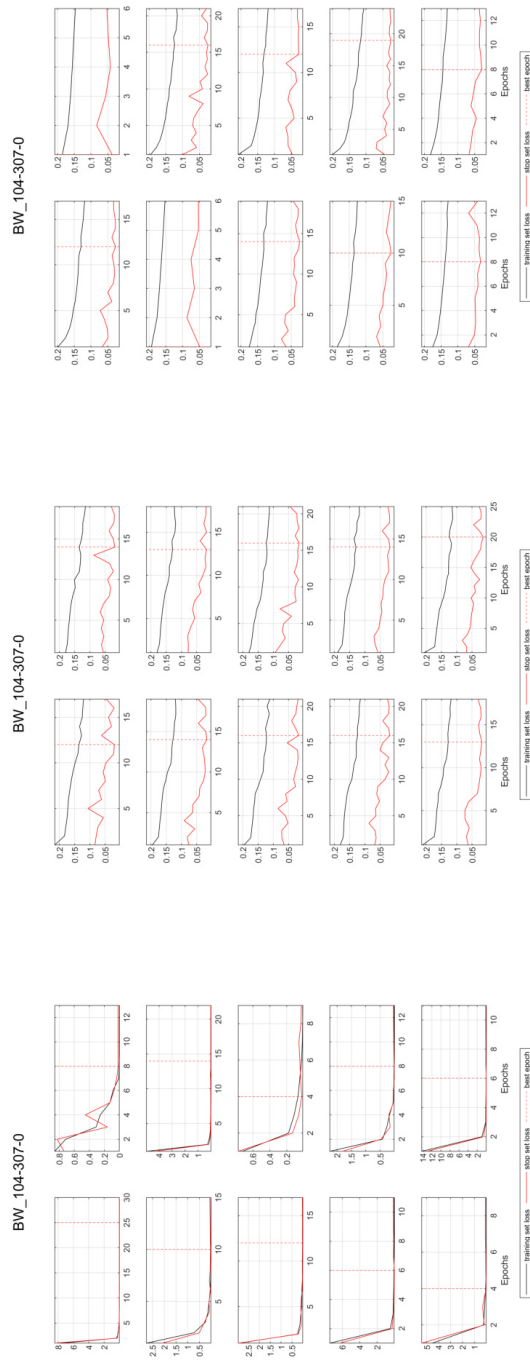

Figure S77: Seq2Val training and early stopping loss (MSE) for all 10 model initializations for well BW\_104-307-0: NARX (top), LSTM (middle), CNN (bottom)

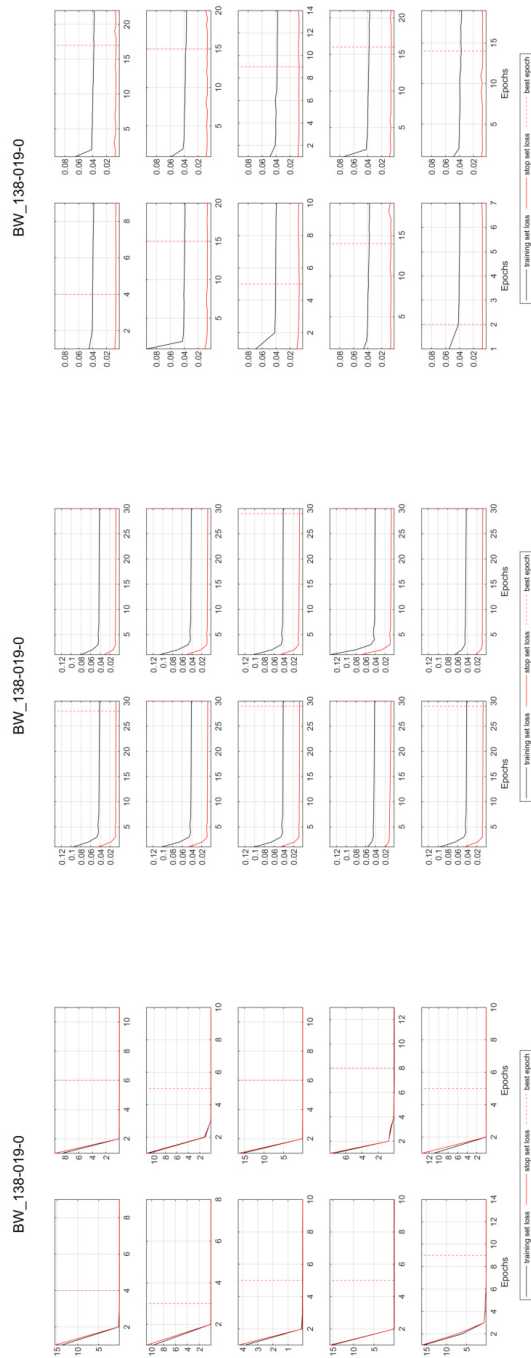

Figure S78: Seq2Val training and early stopping loss (MSE) for all 10 model initializations for well BW\_138-019-0: NARX (top), LSTM (middle), CNN (bottom)

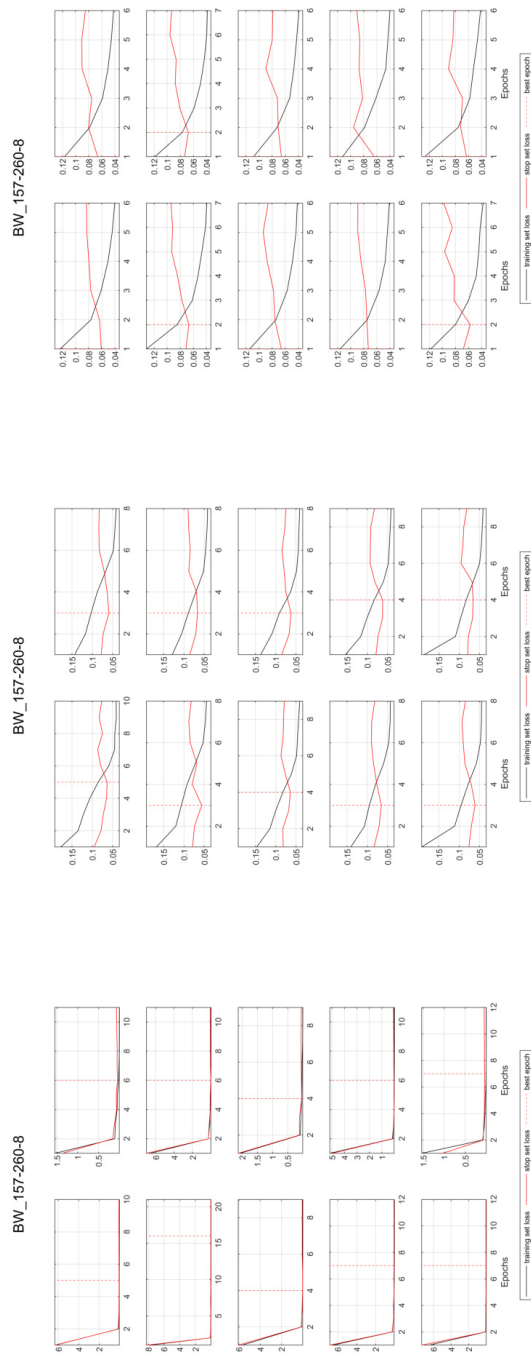

Figure S79: Seq2Val training and early stopping loss (MSE) for all 10 model initializations for well BW\_157-260-8: NARX (top), LSTM (middle), CNN (bottom)

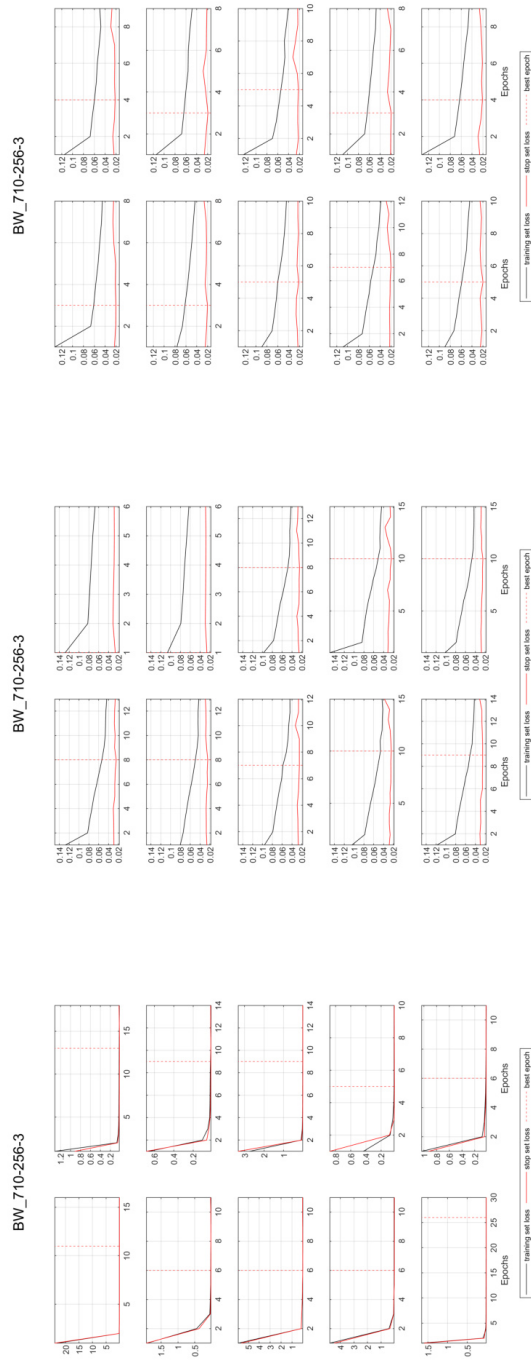

Figure S80: Seq2Val training and early stopping loss (MSE) for all 10 model initializations for well BW\_710-256-3: NARX (top), LSTM (middle), CNN (bottom)

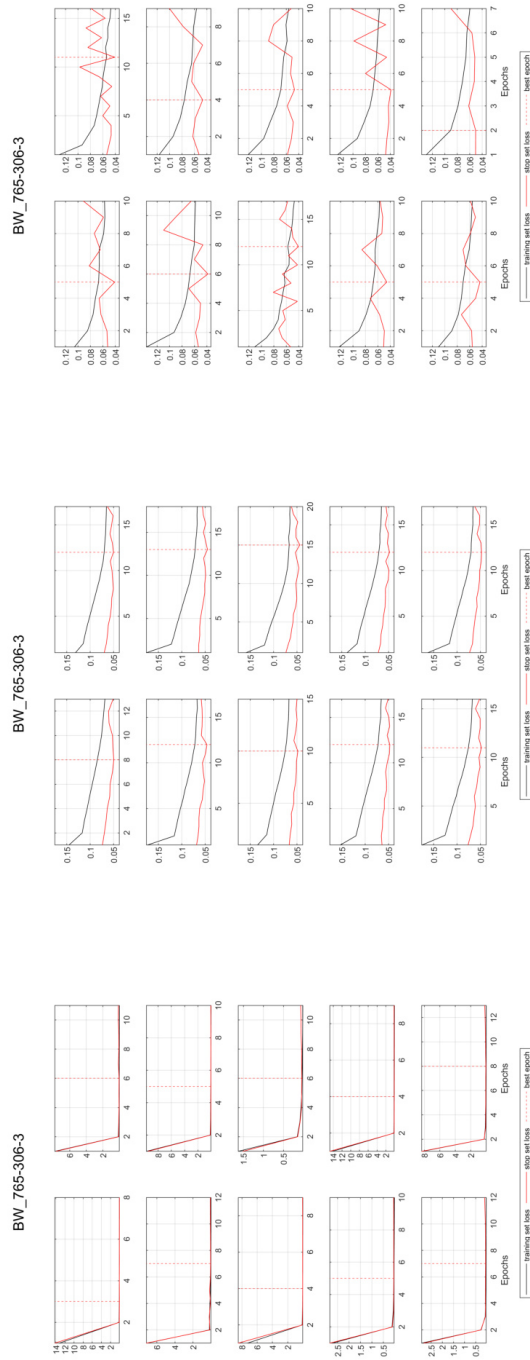

Figure S81: Seq2Val training and early stopping loss (MSE) for all 10 model initializations for well BW\_765-306-3: NARX (top), LSTM (middle), CNN (bottom)



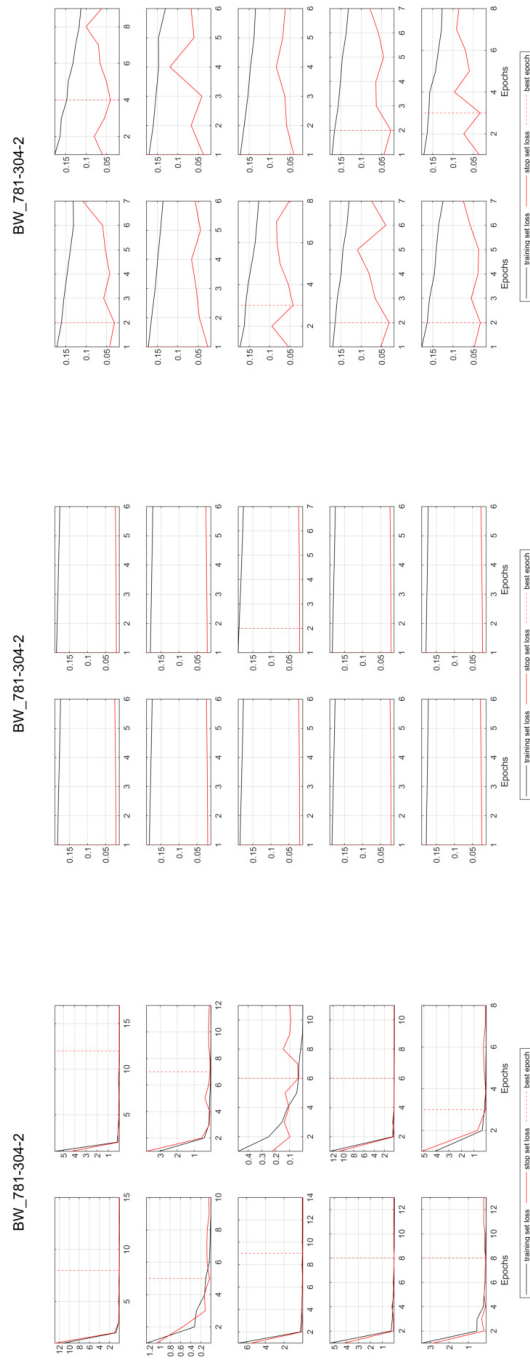

Figure S82: Seq2Val training and early stopping loss (MSE) for all 10 model initializations for well BW\_781-304-2: NARX (top), LSTM (middle), CNN (bottom)

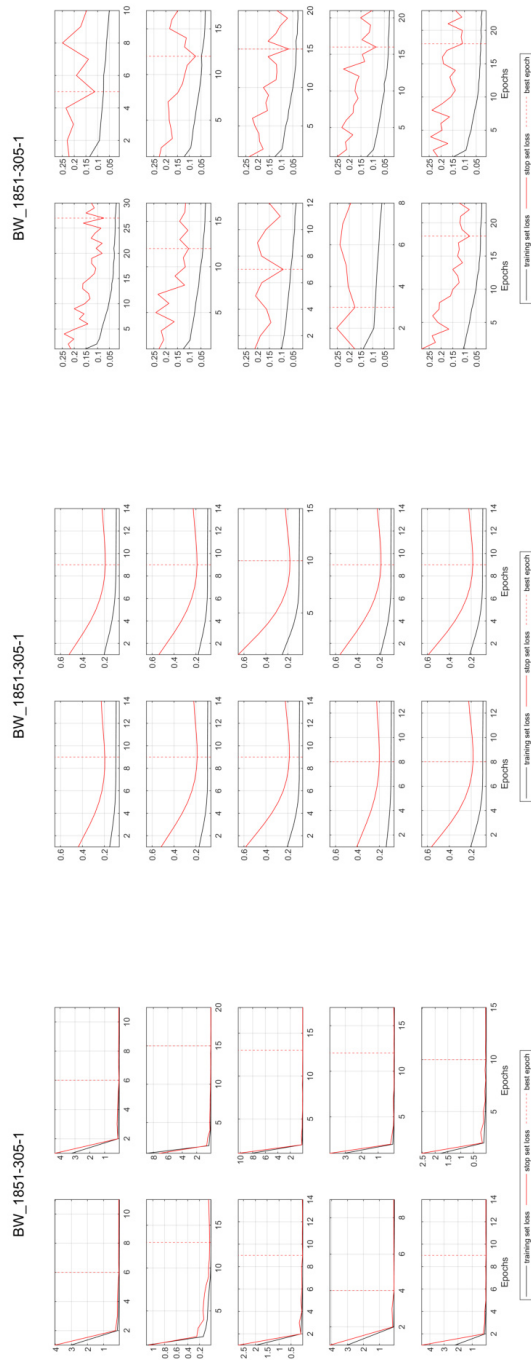

Figure S83: Seq2Val training and early stopping loss (MSE) for all 10 model initializations for well BW\_1851-305-1: NARX (top), LSTM (middle), CNN (bottom)

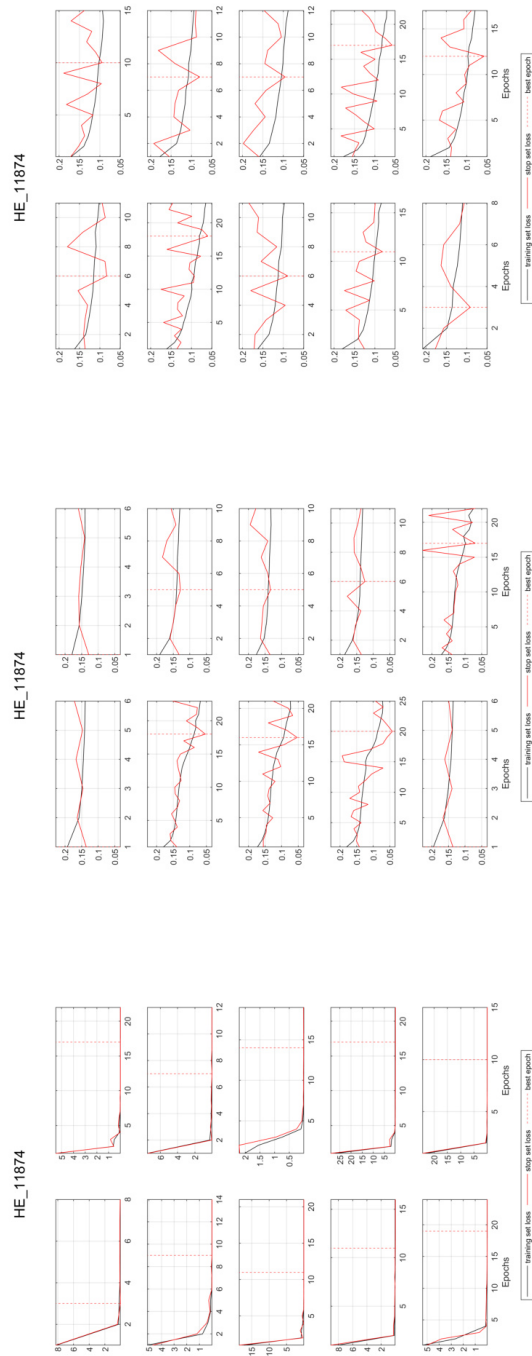

Figure S84: Seq2Val training and early stopping loss (MSE) for all 10 model initializations for well HE\_11874: NARX (top), LSTM (middle), CNN (bottom)

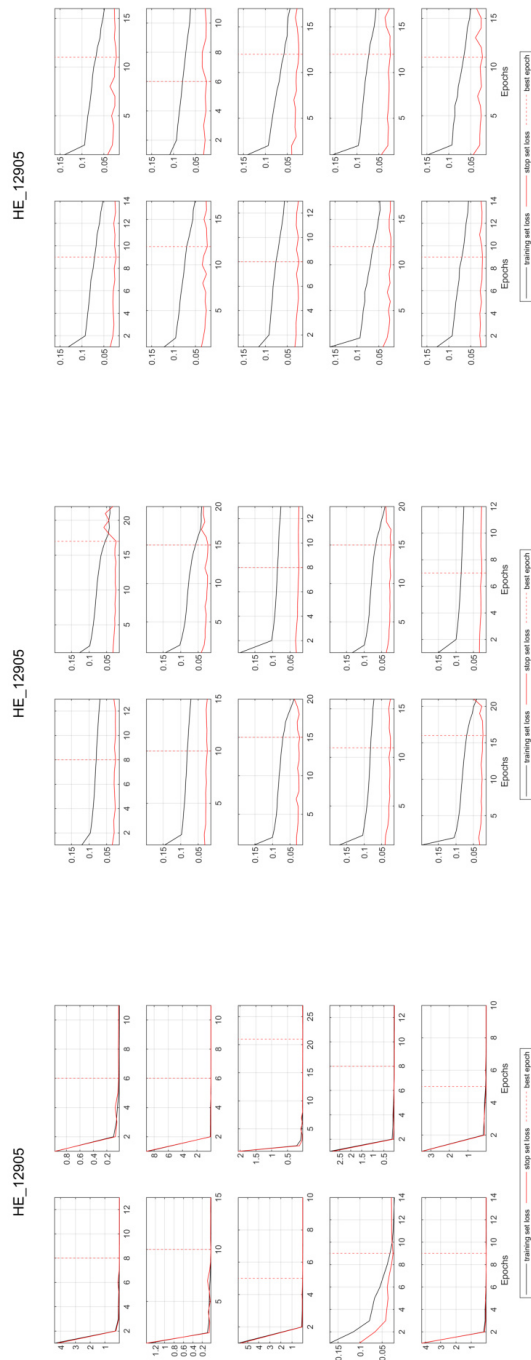

Figure S85: Seq2Val training and early stopping loss (MSE) for all 10 model initializations for well HE\_12905: NARX (top), LSTM (middle), CNN (bottom)

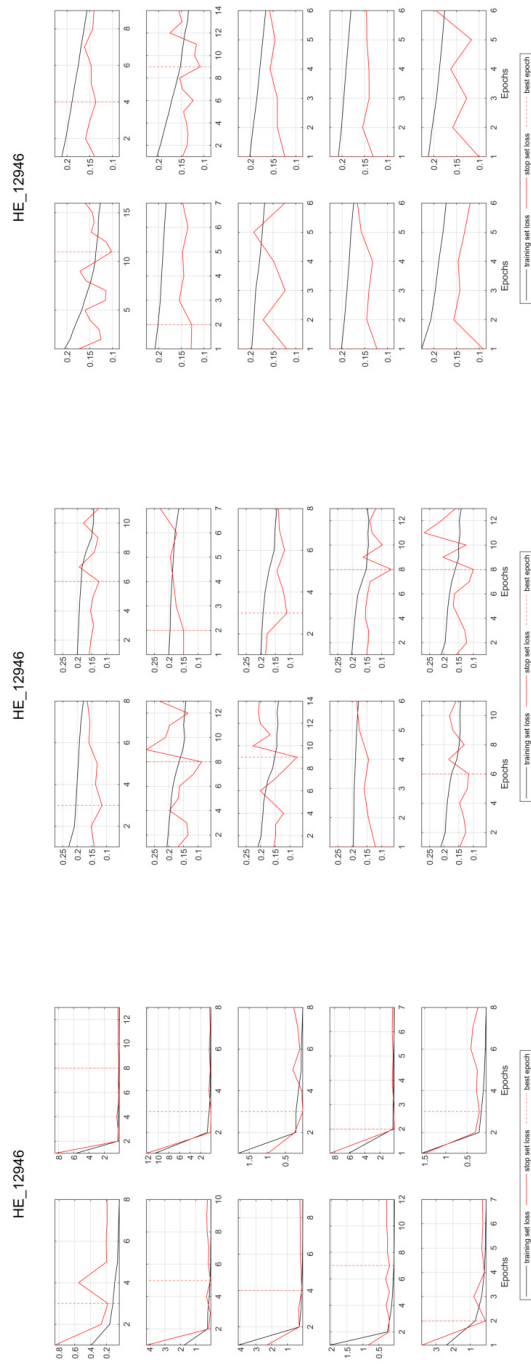

Figure S86: Seq2Val training and early stopping loss (MSE) for all 10 model initializations for well HE\_12946: NARX (top), LSTM (middle), CNN (bottom)

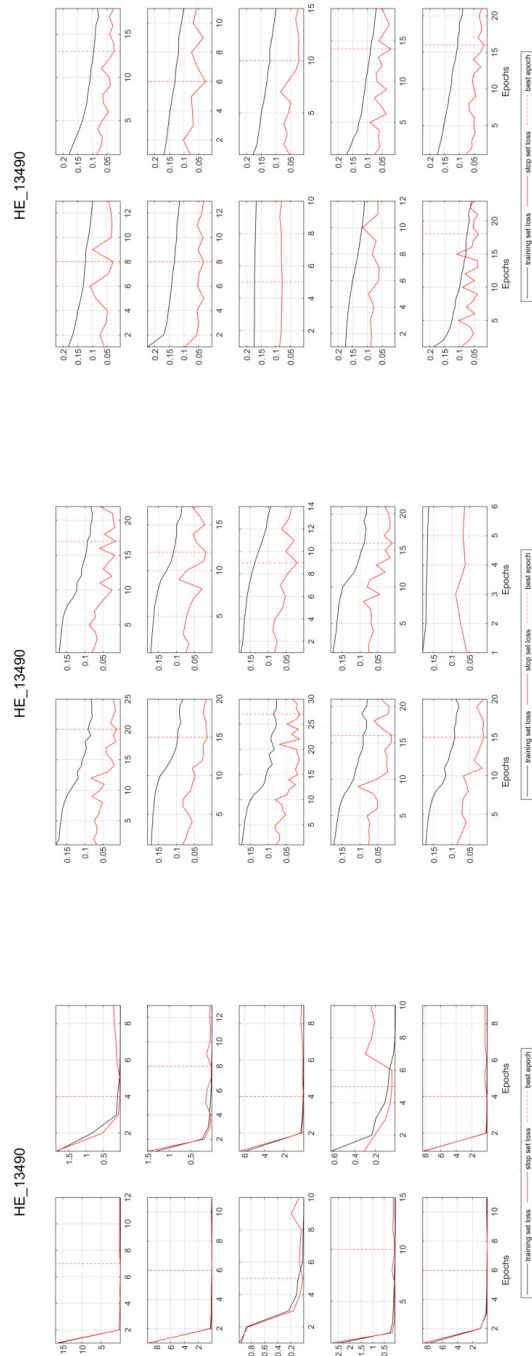

Figure S87: Seq2Val training and early stopping loss (MSE) for all 10 model initializations for well HE\_13490: NARX (top), LSTM (middle), CNN (bottom)

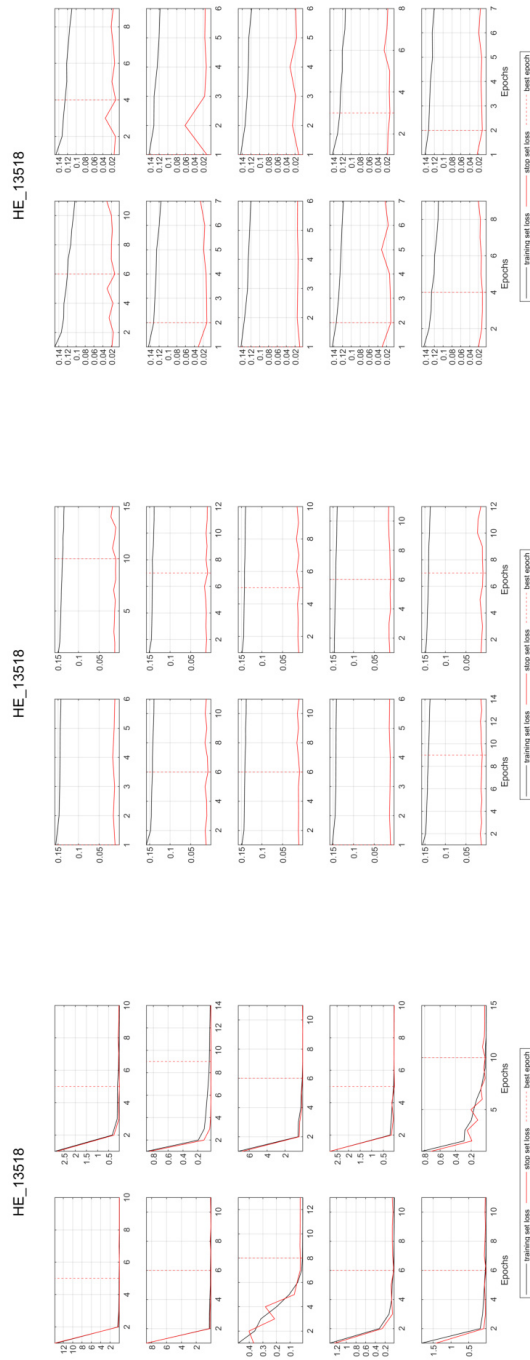

Figure S88: Seq2Val training and early stopping loss (MSE) for all 10 model initializations for well HE\_13518: NARX (top), LSTM (middle), CNN (bottom)

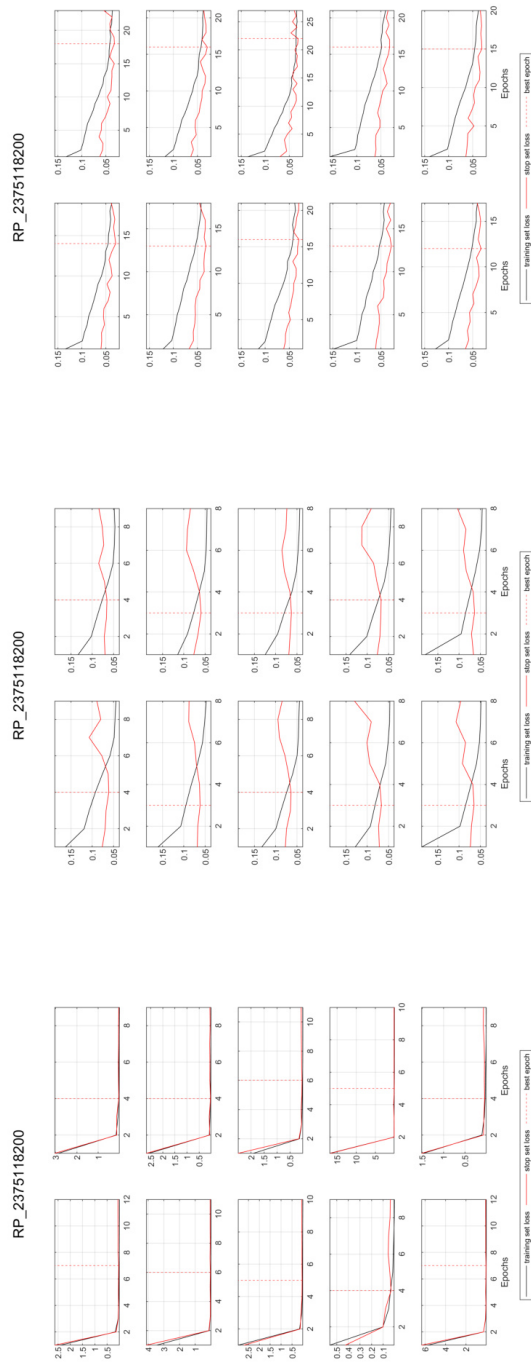

Figure S89: Seq2Val training and early stopping loss (MSE) for all 10 model initializations for well RP\_2375118200: NARX (top), LSTM (middle), CNN (bottom)



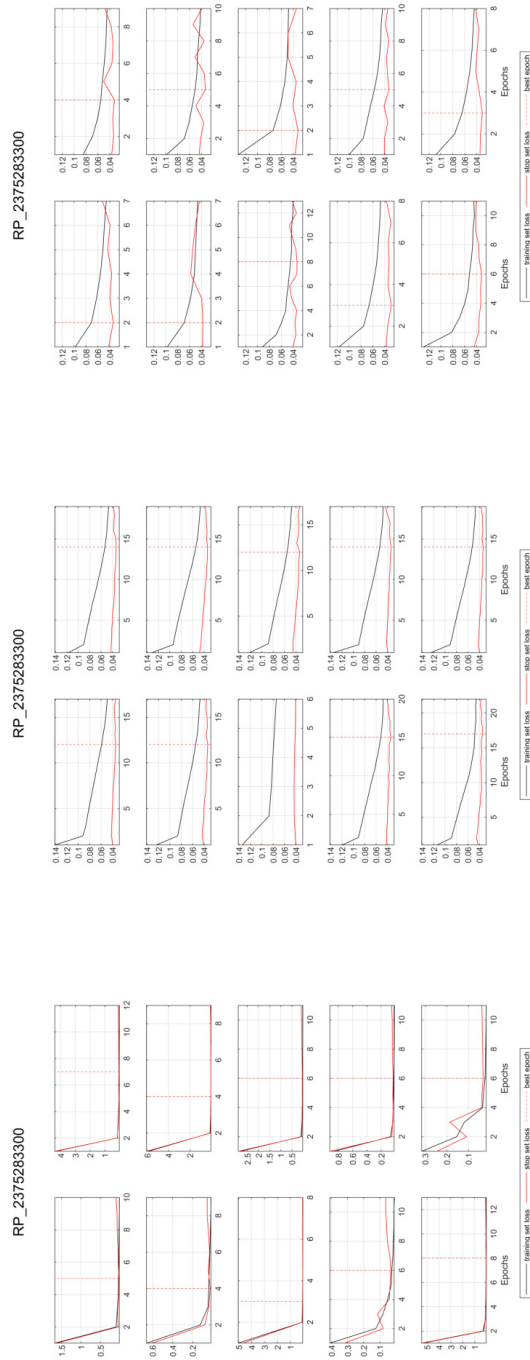

Figure S90: Seq2Val training and early stopping loss (MSE) for all 10 model initializations for well RP\_2375283300: NARX (top), LSTM (middle), CNN (bottom)

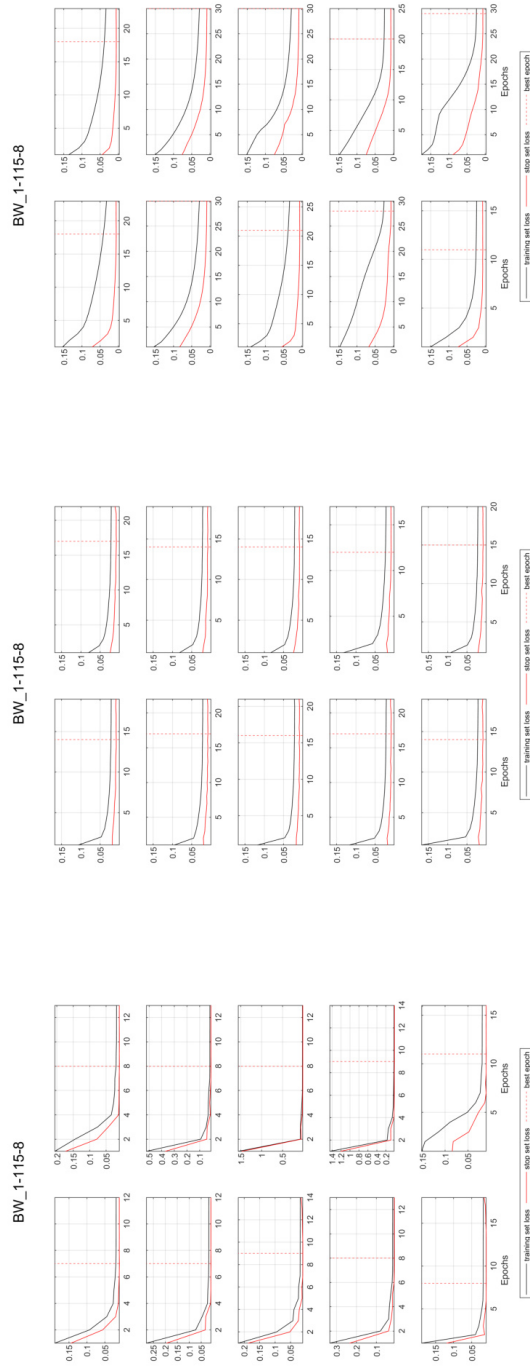

Figure S91: Seq2Val  $\text{GWL}_{t-1}$  training and early stopping loss (MSE) for all 10 model initializations for well BW\_1-115-8: NARX (top), LSTM (middle), CNN (bottom)

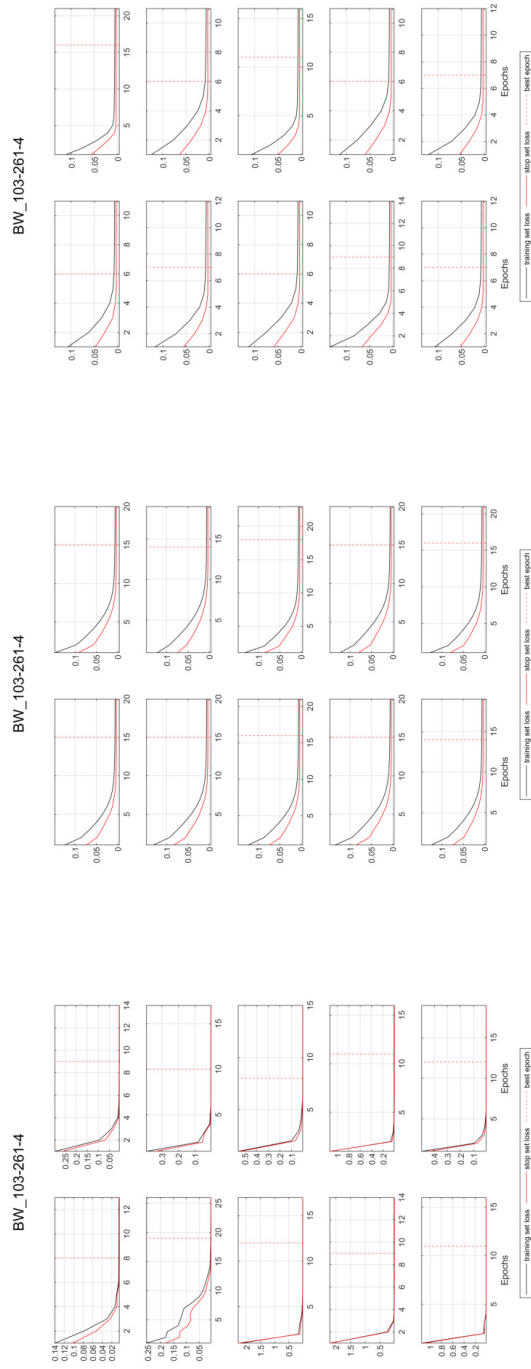

Figure S92: Seq2Val  $\text{GWL}_{t-1}$  training and early stopping loss (MSE) for all 10 model initializations for well BW\_103-261-4: NARX (top), LSTM (middle), CNN (bottom)

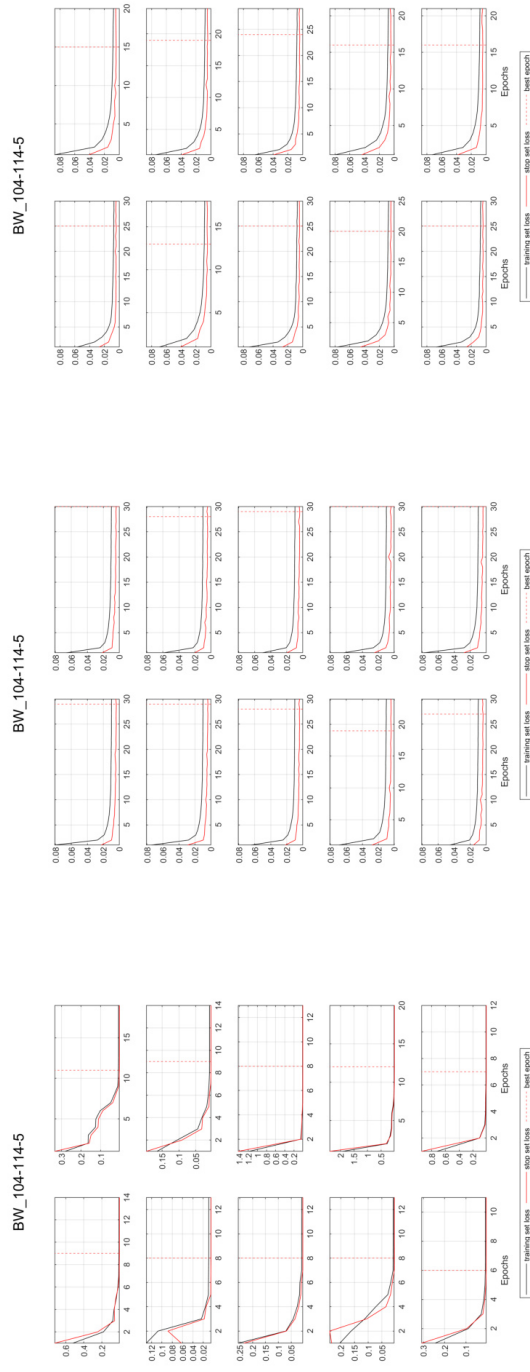

Figure S93: Seq2Val  $\text{GWL}_{t-1}$  training and early stopping loss (MSE) for all 10 model initializations for well BW\_104-114-5: NARX (top), LSTM (middle), CNN (bottom)

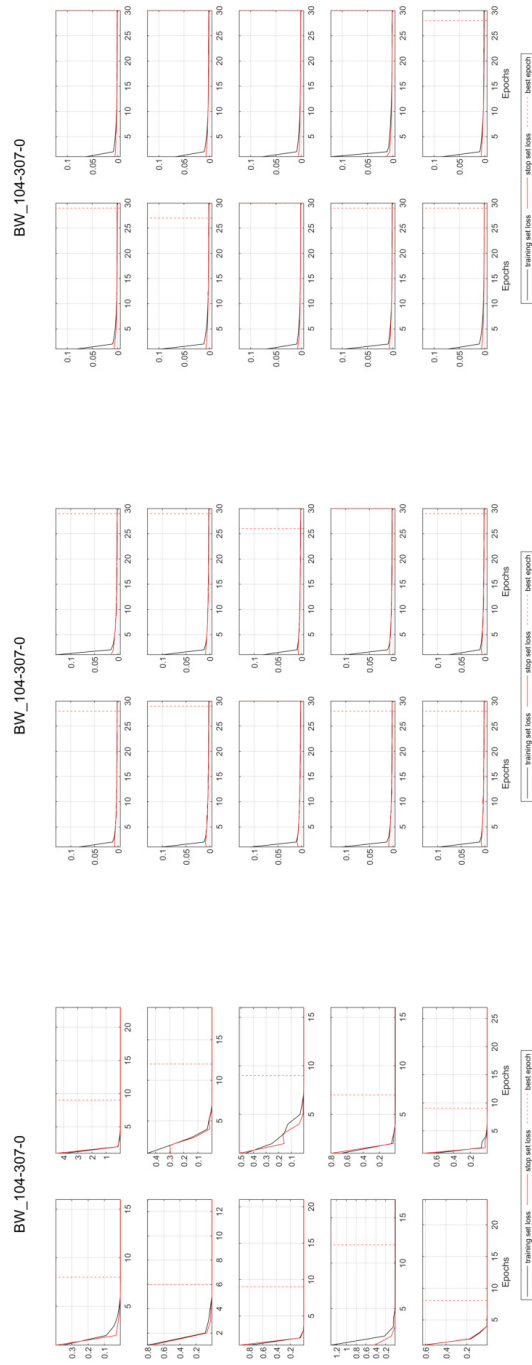

Figure S94: Seq2Val  $\text{GWL}_{t-1}$  training and early stopping loss (MSE) for all 10 model initializations for well BW\_104-307-0: NARX (top), LSTM (middle), CNN (bottom)

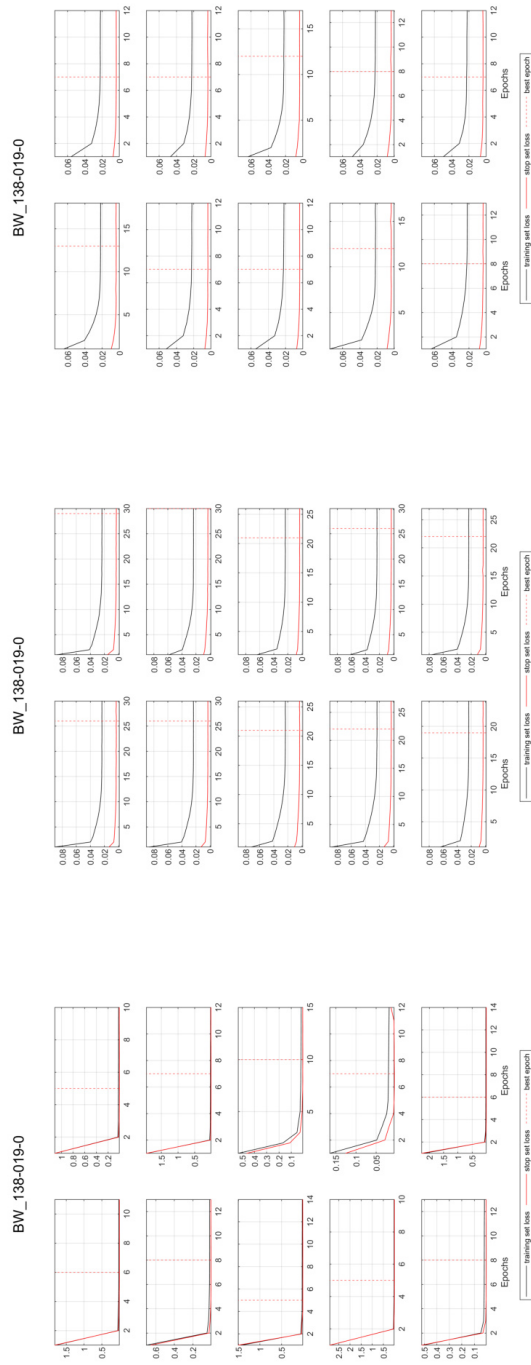

Figure S95: Seq2Val  $\text{GWL}_{t-1}$  training and early stopping loss (MSE) for all 10 model initializations for well BW\_138-019-0: NARX (top), LSTM (middle), CNN (bottom)

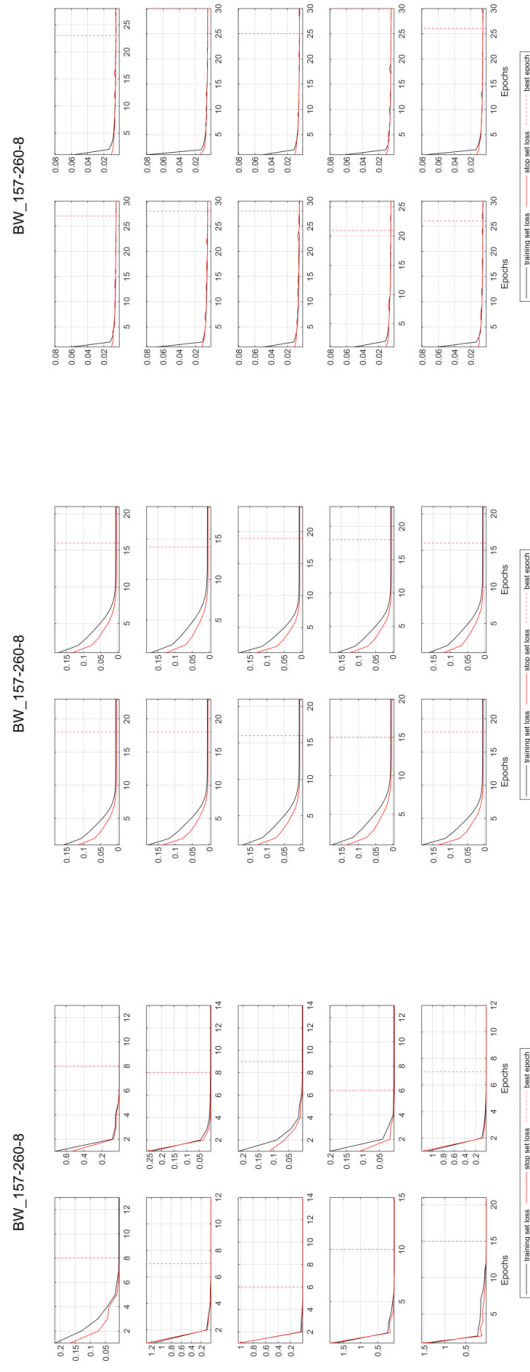

Figure S96: Seq2Val  $\text{GWL}_{t-1}$  training and early stopping loss (MSE) for all 10 model initializations for well BW\_157-260-8: NARX (top), LSTM (middle), CNN (bottom)

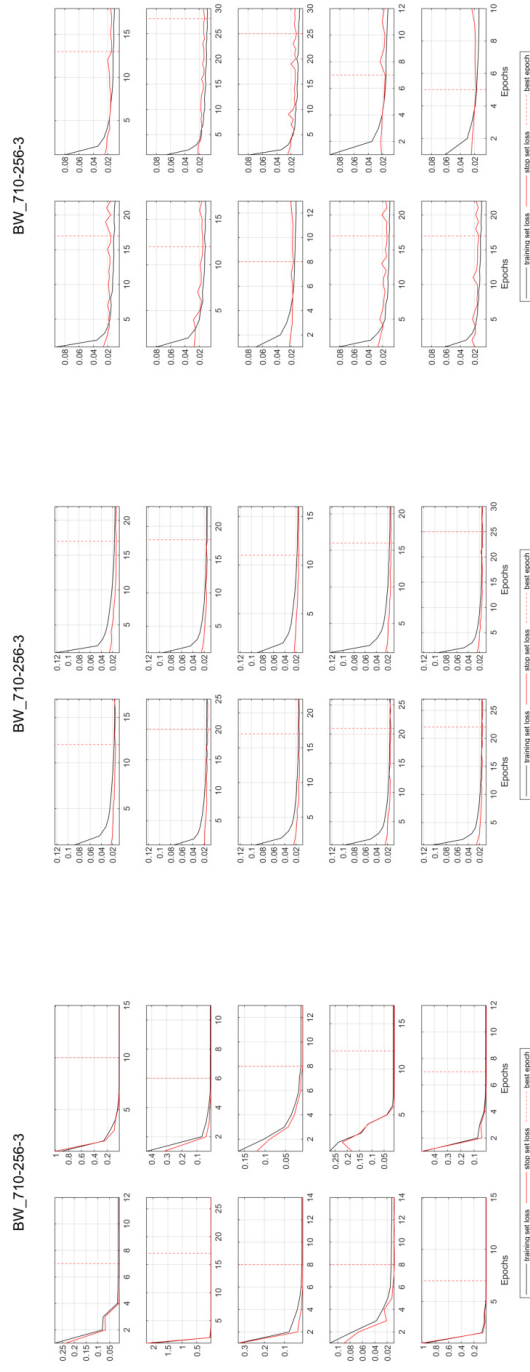

Figure S97: Seq2Val  $\text{GWL}_{t-1}$  training and early stopping loss (MSE) for all 10 model initializations for well BW\_710-256-3: NARX (top), LSTM (middle), CNN (bottom)



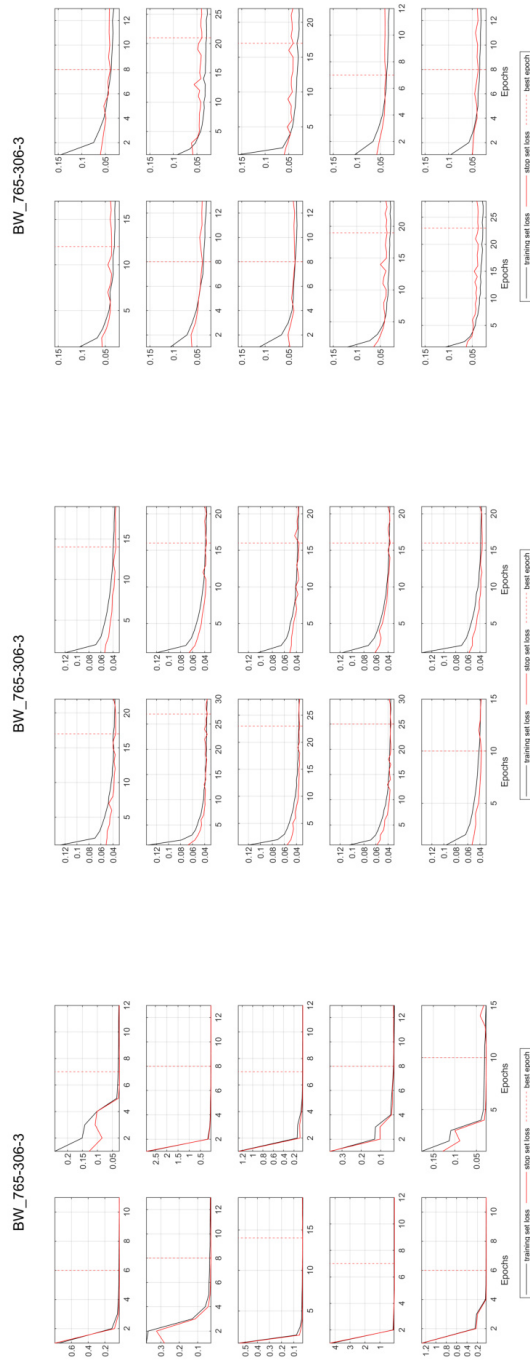

Figure S98: Seq2Val  $\text{GWL}_{t-1}$  training and early stopping loss (MSE) for all 10 model initializations for well BW\_765-306-3: NARX (top), LSTM (middle), CNN (bottom)

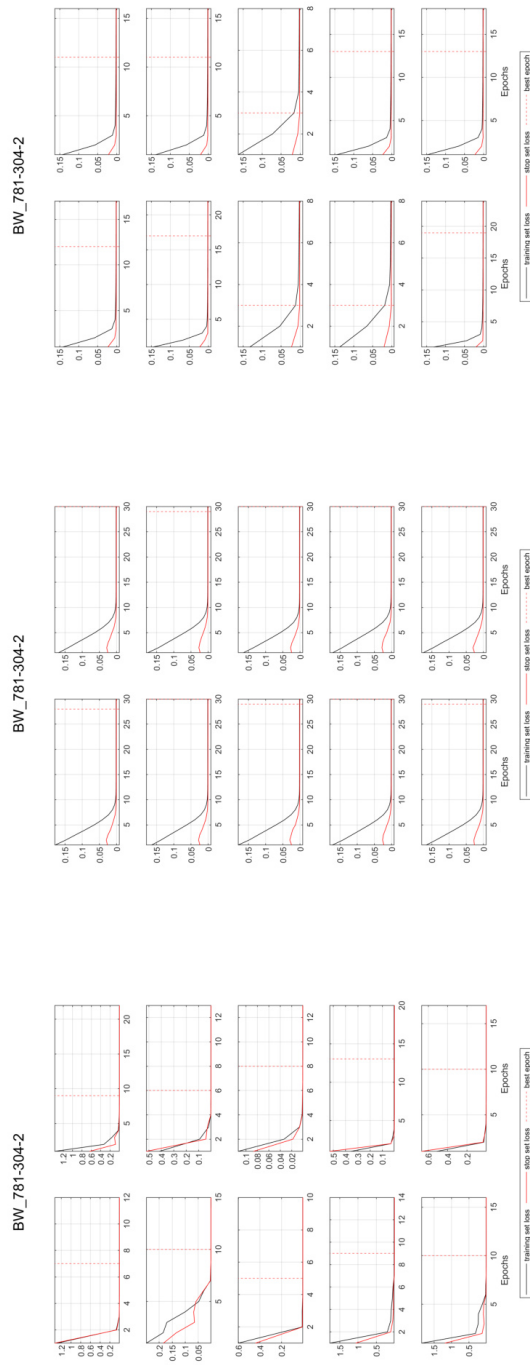

Figure S99: Seq2Val  $\text{GWL}_{t-1}$  training and early stopping loss (MSE) for all 10 model initializations for well BW\_781-304-2: NARX (top), LSTM (middle), CNN (bottom)

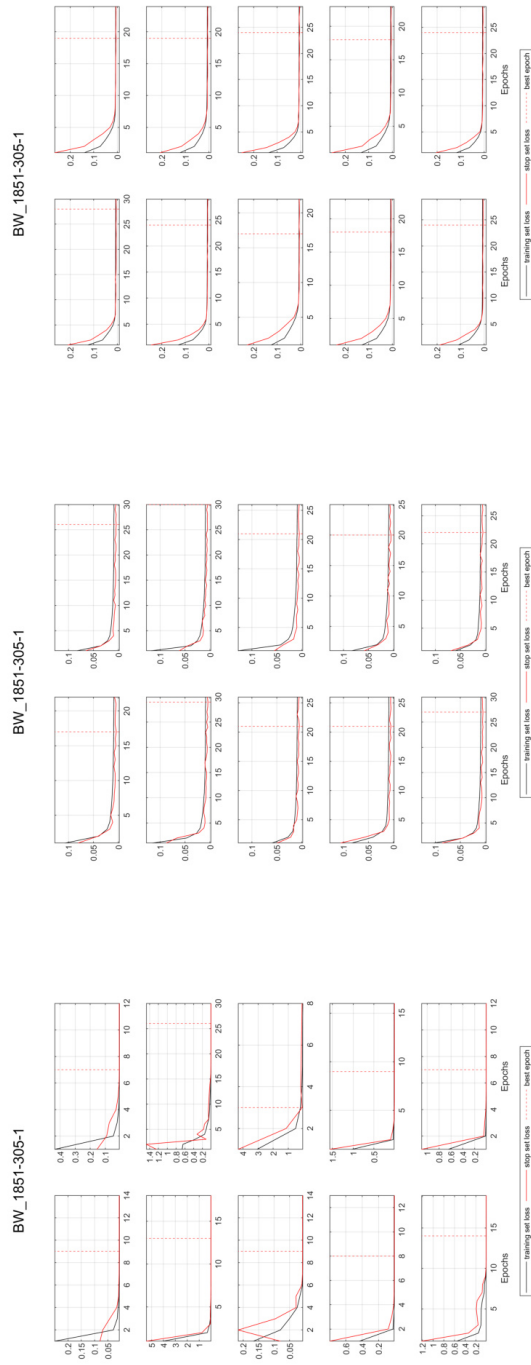

Figure S100: Seq2Val  $\text{GWL}_{t-1}$  training and early stopping loss (MSE) for all 10 model initializations for well BW\_1851-305-1: NARX (top), LSTM (middle), CNN (bottom)

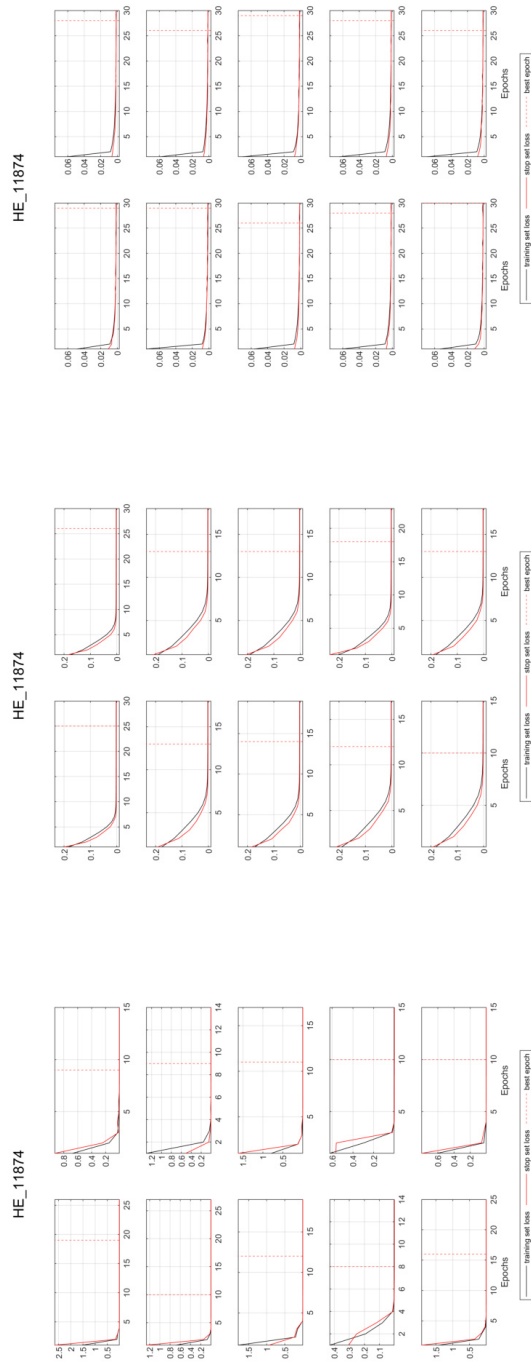

Figure S101: Seq2Val  $GWL_{t-1}$  training and early stopping loss (MSE) for all 10 model initializations for well HE\_11874: NARX (top), LSTM (middle), CNN (bottom)

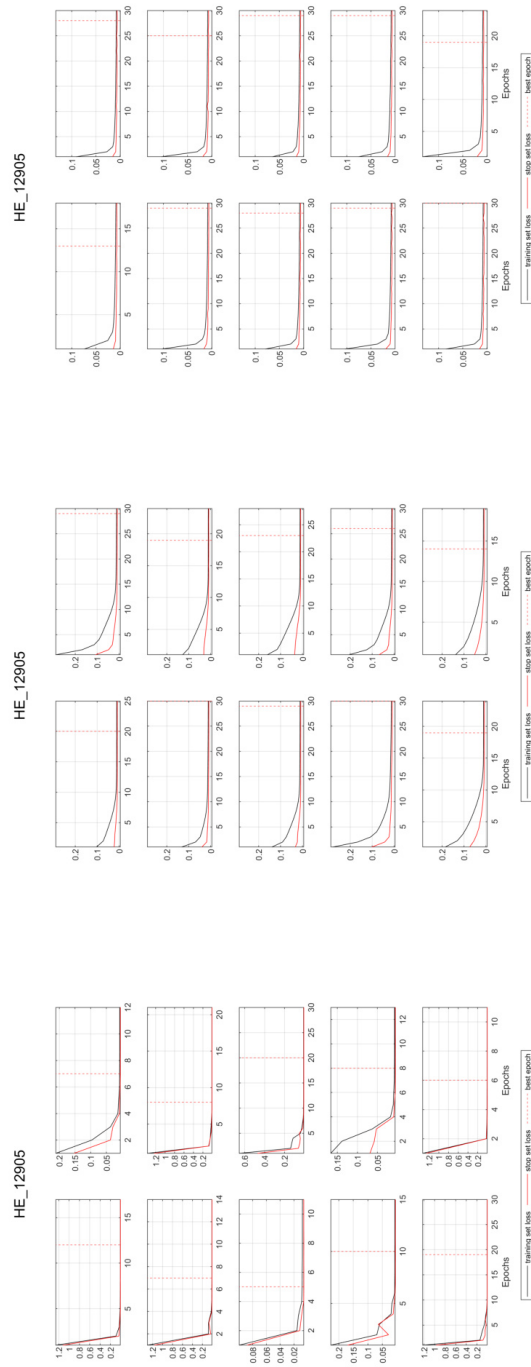

Figure S102: Seq2Val  $GWL_{t-1}$  training and early stopping loss (MSE) for all 10 model initializations for well HE\_12905: NARX (top), LSTM (middle), CNN (bottom)

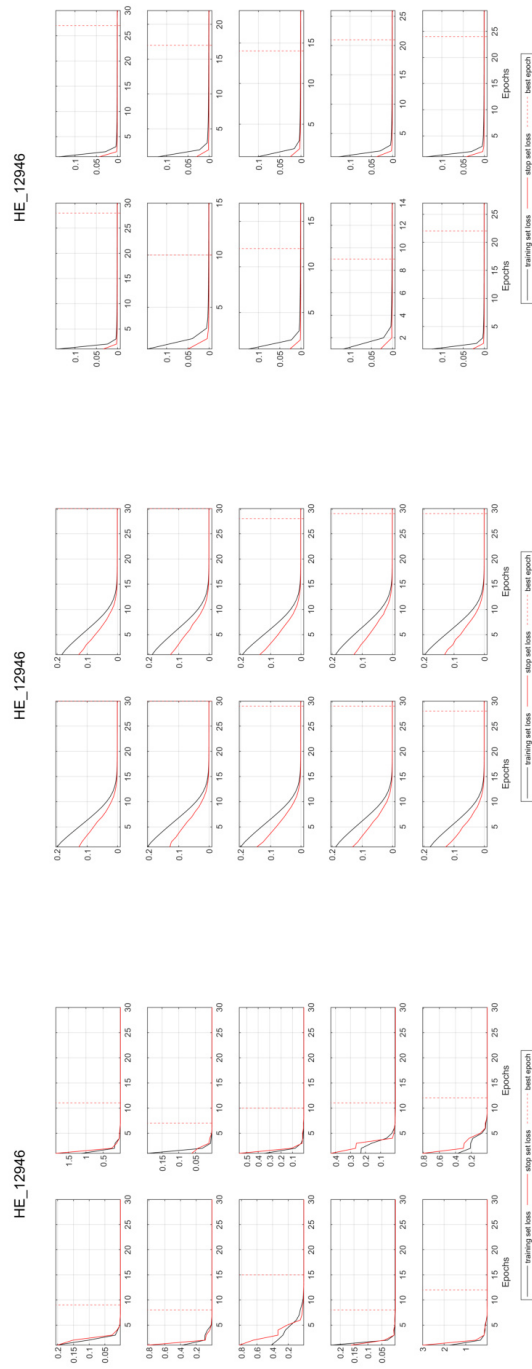

Figure S103: Seq2Val  $GWL_{t-1}$  training and early stopping loss (MSE) for all 10 model initializations for well HE\_12946: NARX (top), LSTM (middle), CNN (bottom)

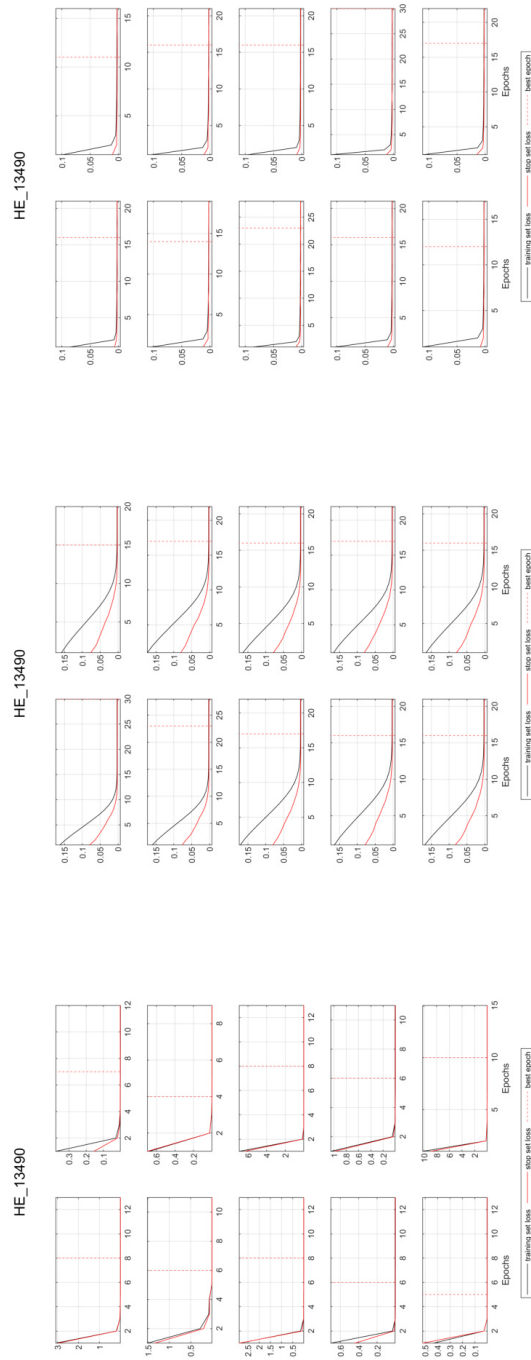

Figure S104: Seq2Val  $\text{GWL}_{t-1}$  training and early stopping loss (MSE) for all 10 model initializations for well HE\_13490: NARX (top), LSTM (middle), CNN (bottom)

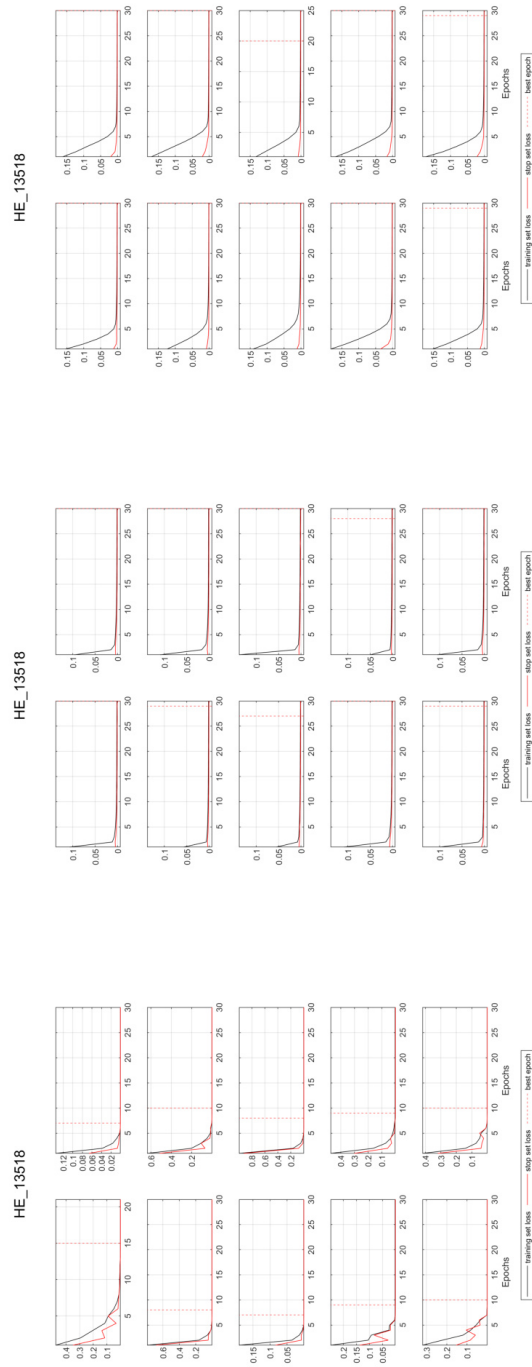

Figure S105: Seq2Val  $\text{GWL}_{t-1}$  training and early stopping loss (MSE) for all 10 model initializations for well HE\_13518: NARX (top), LSTM (middle), CNN (bottom)



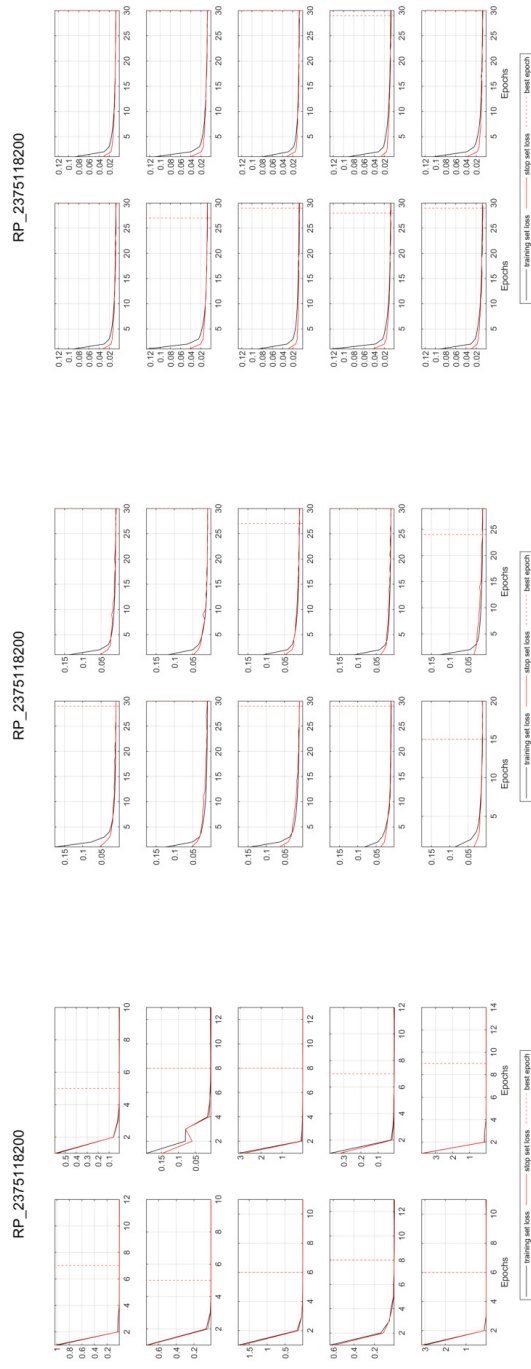

Figure S106: Seq2Val  $GWL_{t-1}$  training and early stopping loss (MSE) for all 10 model initializations for well RP\_2375118200: NARX (top), LSTM (middle), CNN (bottom)

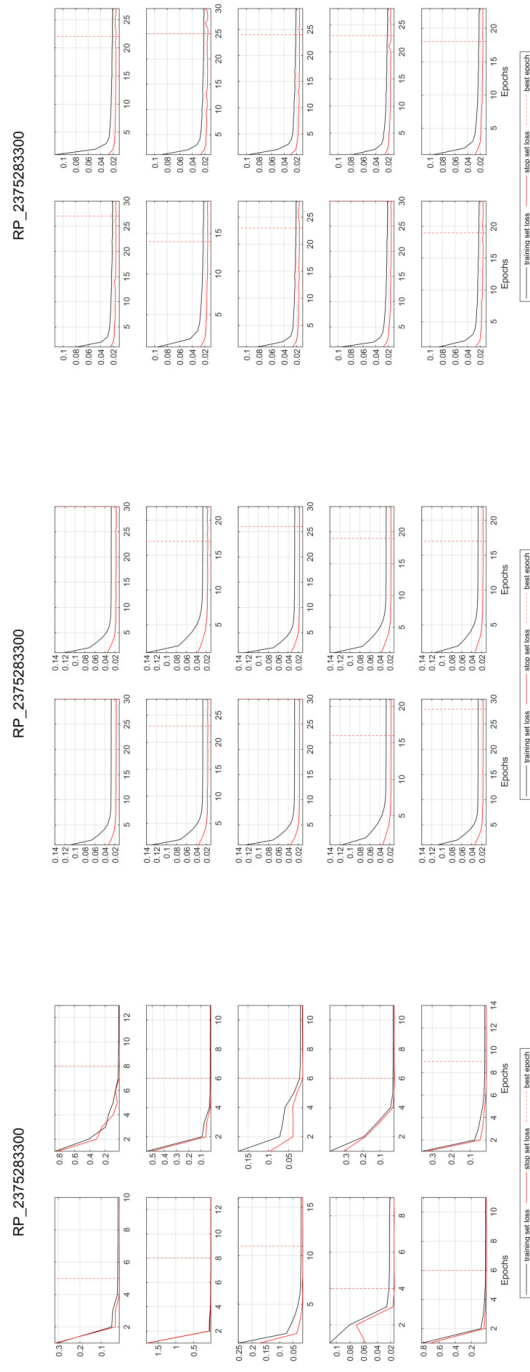

Figure S107: Seq2Val  $GWL_{t-1}$  training and early stopping loss (MSE) for all 10 model initializations for well RP\_2375283300: NARX (top), LSTM (middle), CNN (bottom)

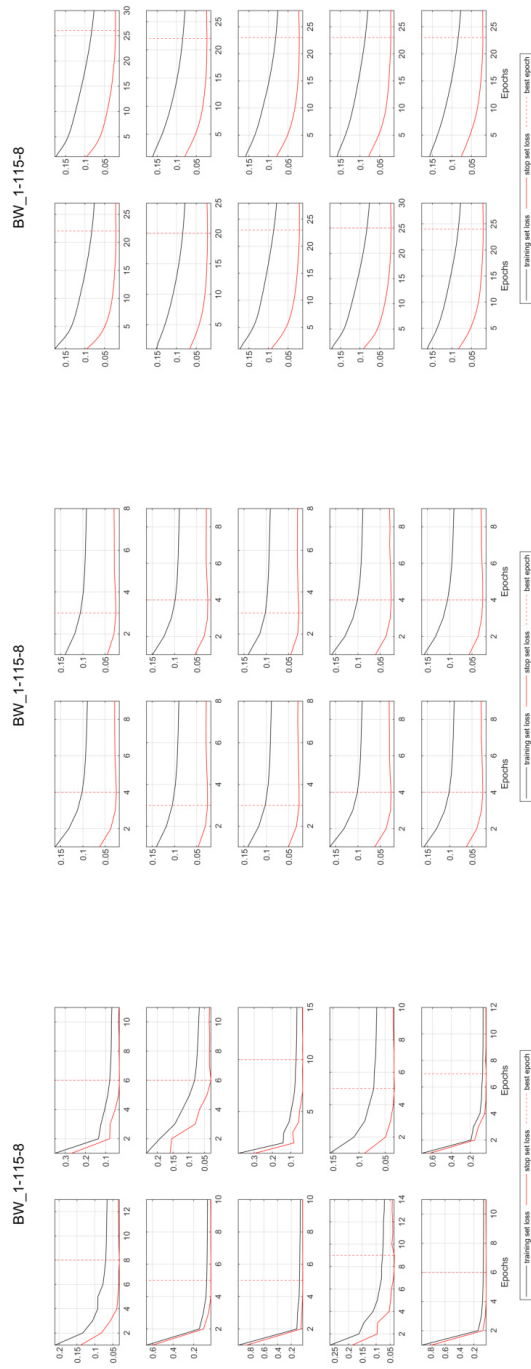

Figure S108: Seq2Seq training and early stopping loss (MSE) for all 10 model initializations for well BW\_1-115-8: NARX (top), LSTM (middle), CNN (bottom)

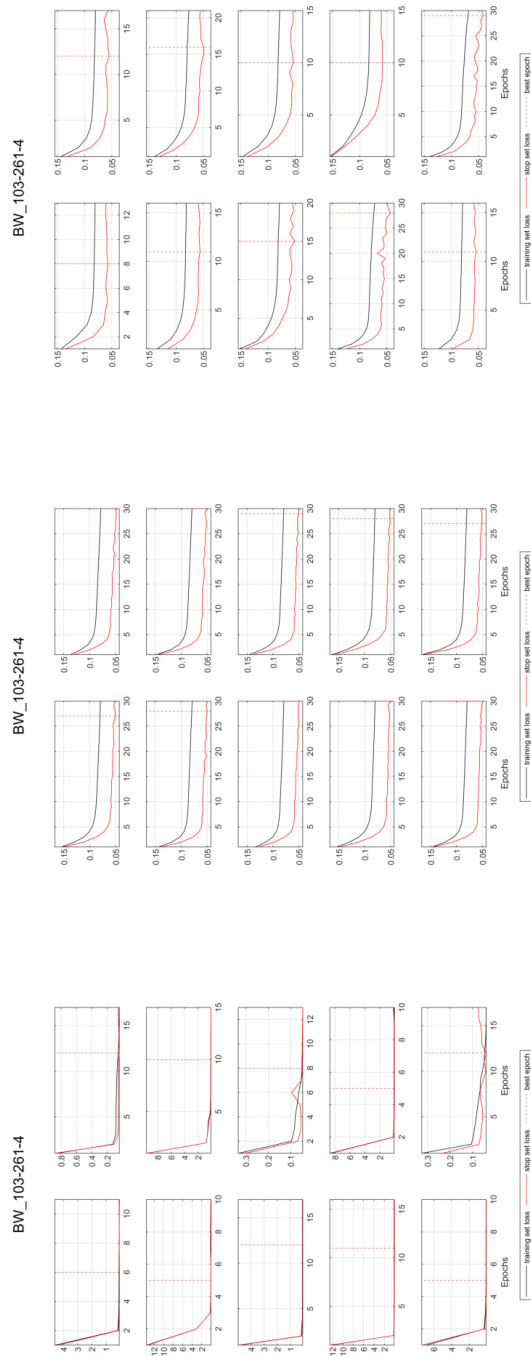

Figure S109: Seq2Seq training and early stopping loss (MSE) for all 10 model initializations for well BW\_103-261-4: NARX (top), LSTM (middle), CNN (bottom)

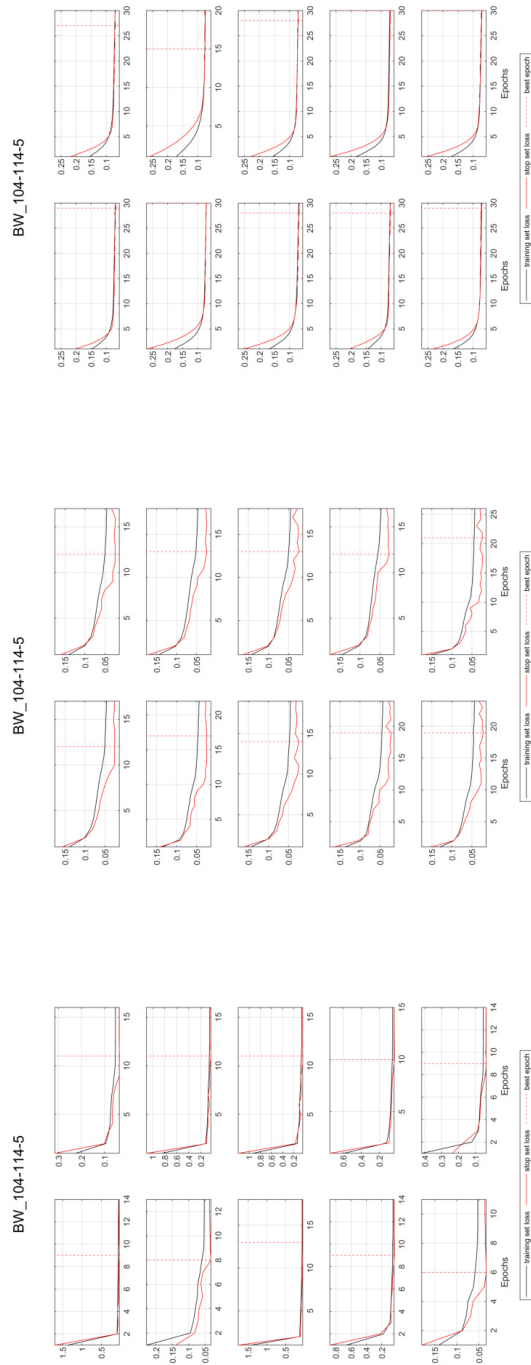

Figure S110: Seq2Seq training and early stopping loss (MSE) for all 10 model initializations for well BW\_104-114-5: NARX (top), LSTM (middle), CNN (bottom)

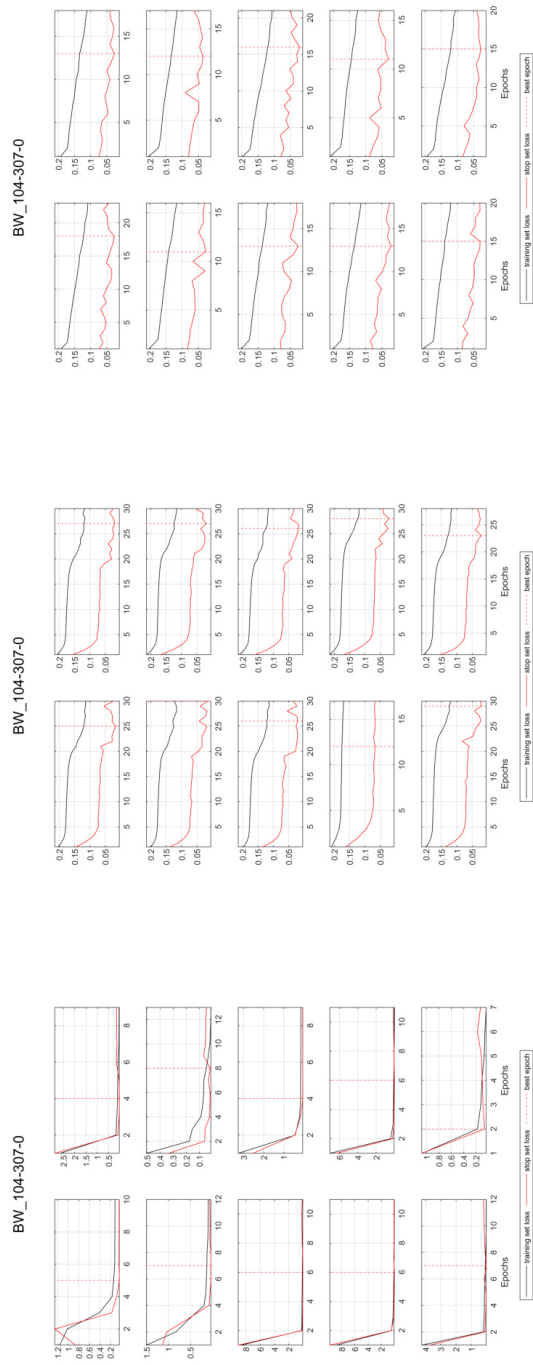

Figure S111: Seq2Seq training and early stopping loss (MSE) for all 10 model initializations for well BW\_104-307-0: NARX (top), LSTM (middle), CNN (bottom)

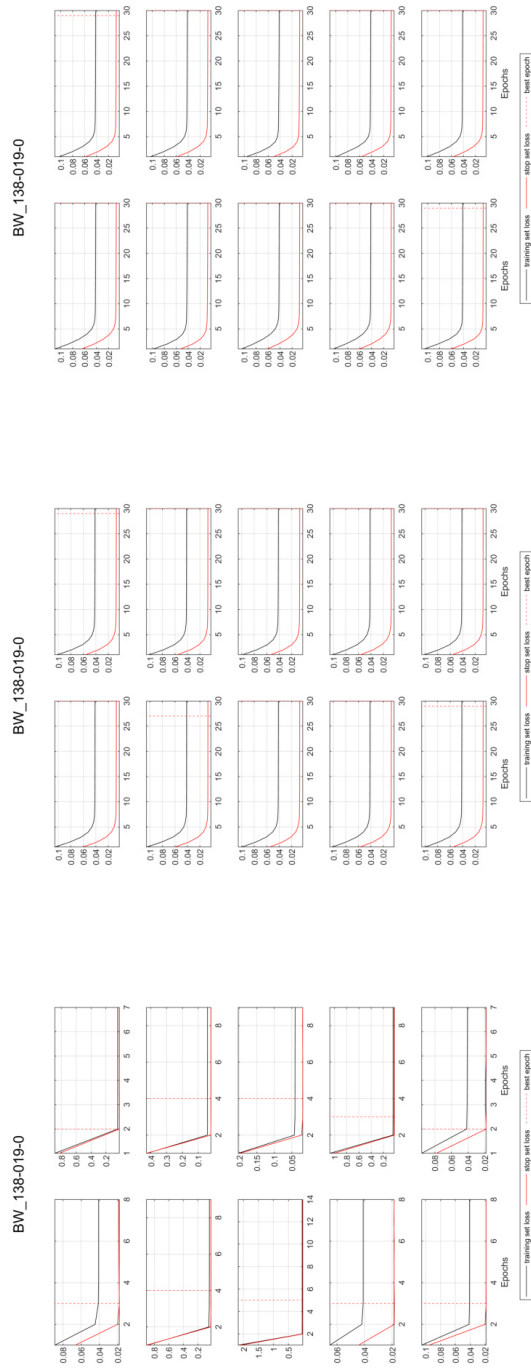

Figure S112: Seq2Seq training and early stopping loss (MSE) for all 10 model initializations for well BW\_138-019-0: NARX (top), LSTM (middle), CNN (bottom)

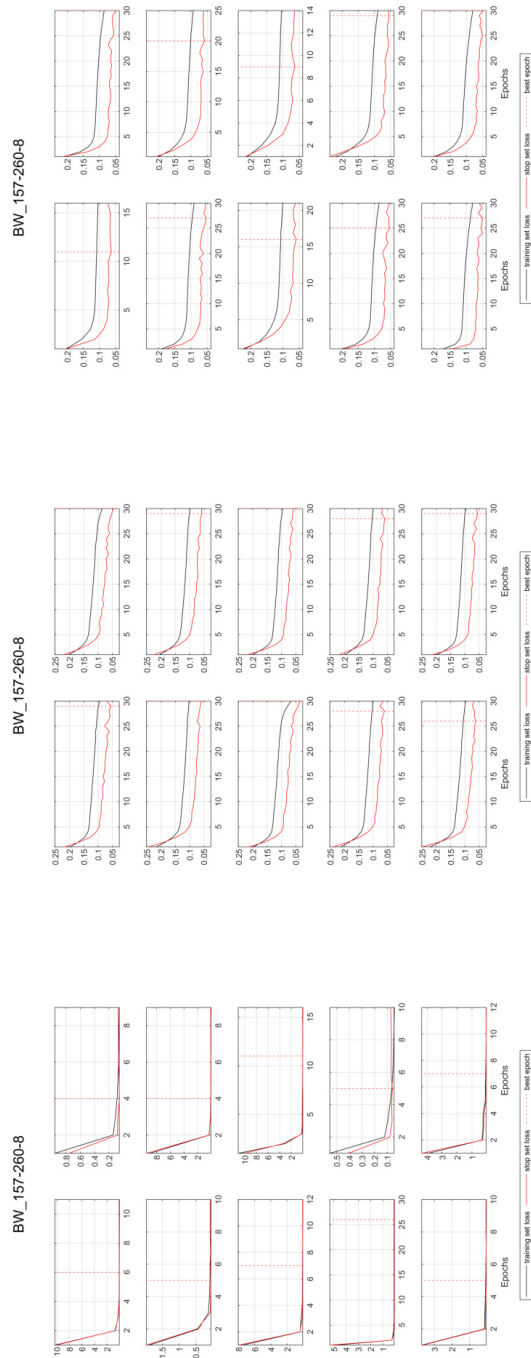

Figure S113: Seq2Seq training and early stopping loss (MSE) for all 10 model initializations for well BW\_157-260-8: NARX (top), LSTM (middle), CNN (bottom)



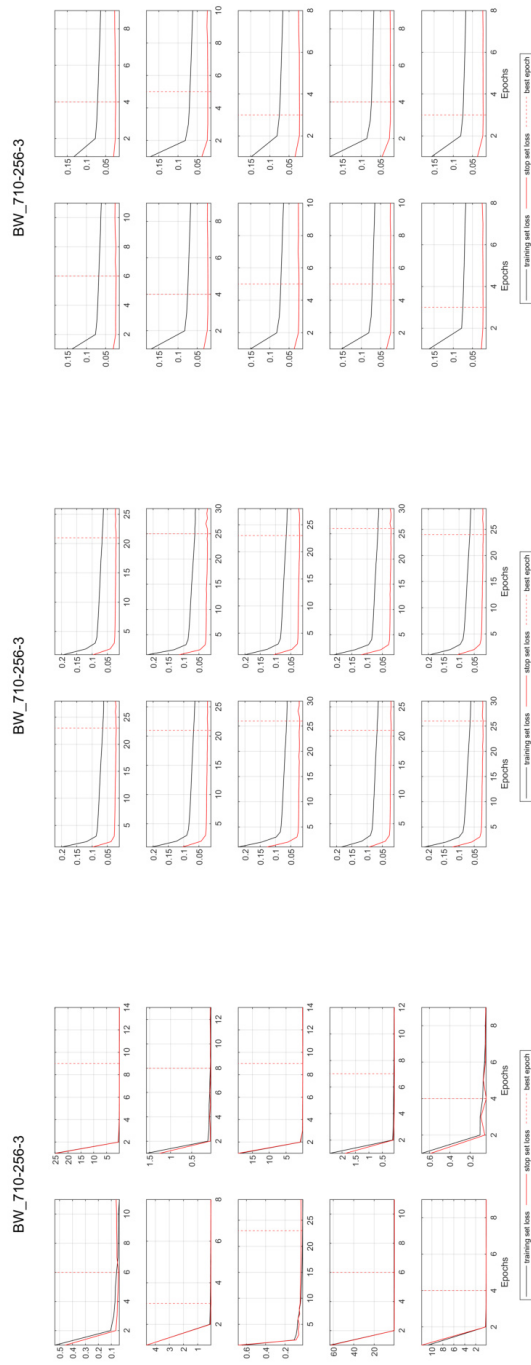

Figure S114: Seq2Seq training and early stopping loss (MSE) for all 10 model initializations for well BW\_710-256-3: NARX (top), LSTM (middle), CNN (bottom)

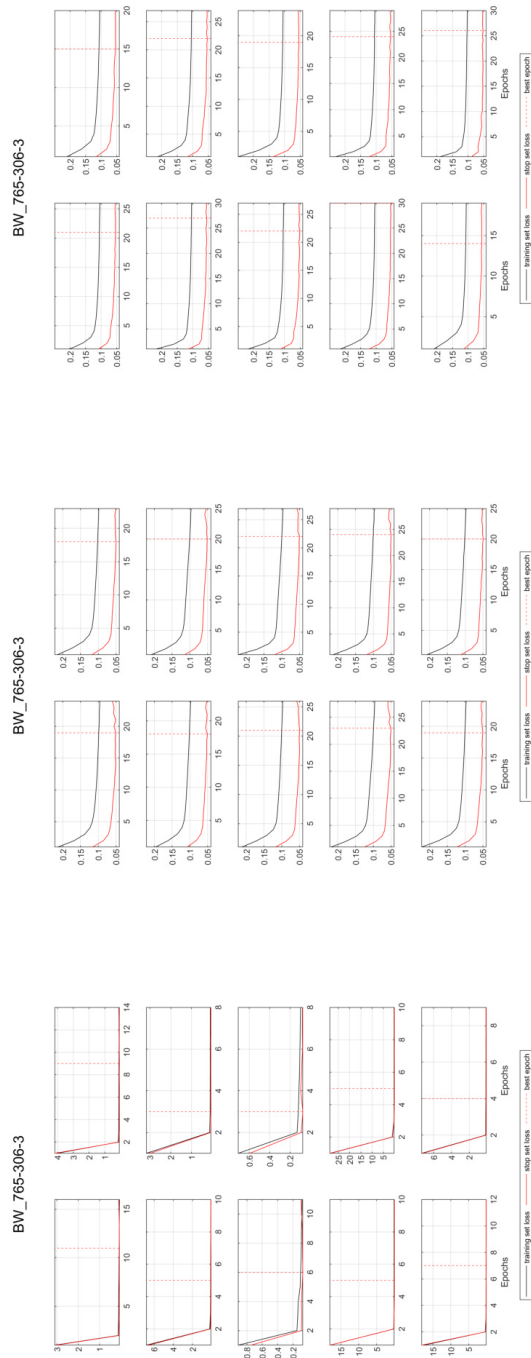

Figure S115: Seq2Seq training and early stopping loss (MSE) for all 10 model initializations for well BW\_765-306-3: NARX (top), LSTM (middle), CNN (bottom)

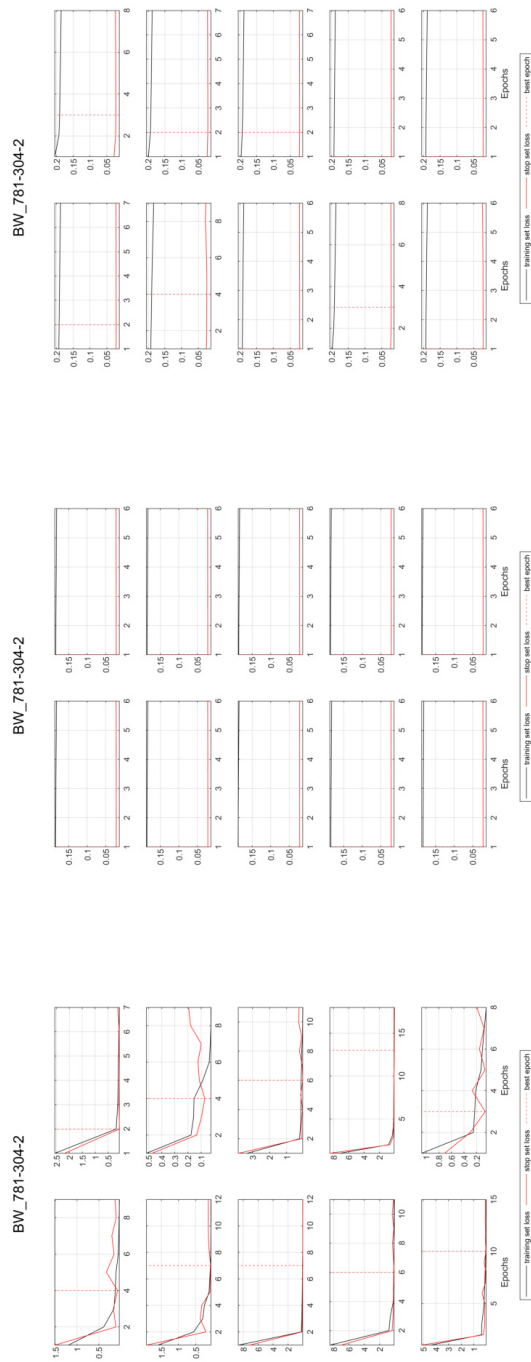

Figure S116: Seq2Seq training and early stopping loss (MSE) for all 10 model initializations for well BW\_781-304-2: NARX (top), LSTM (middle), CNN (bottom)

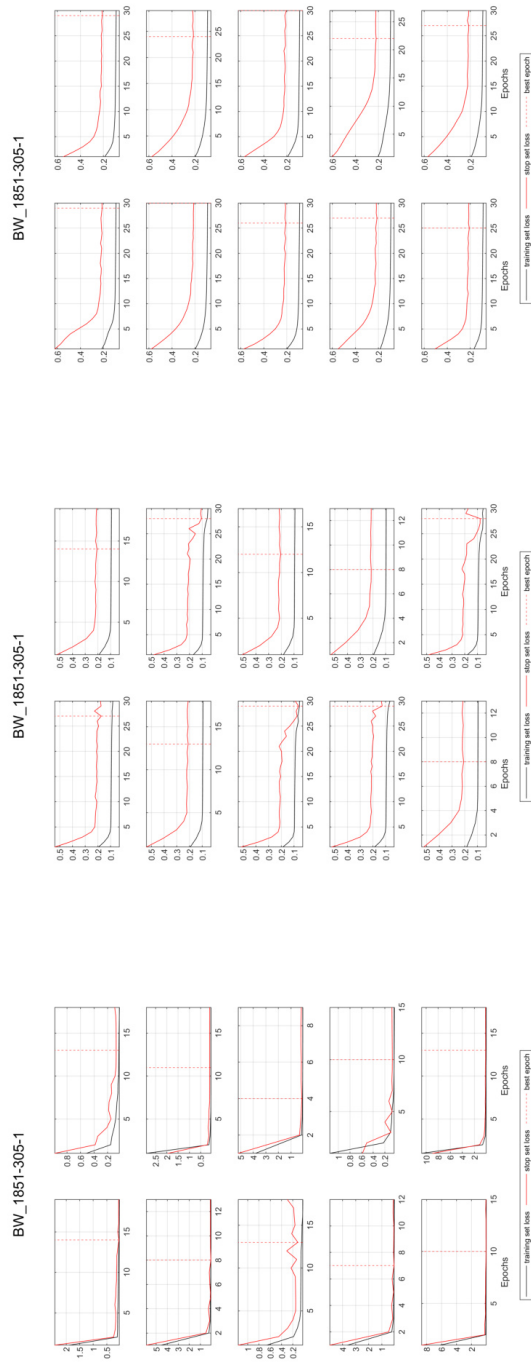

Figure S117: Seq2Seq training and early stopping loss (MSE) for all 10 model initializations for well BW\_1851-305-1: NARX (top), LSTM (middle), CNN (bottom)

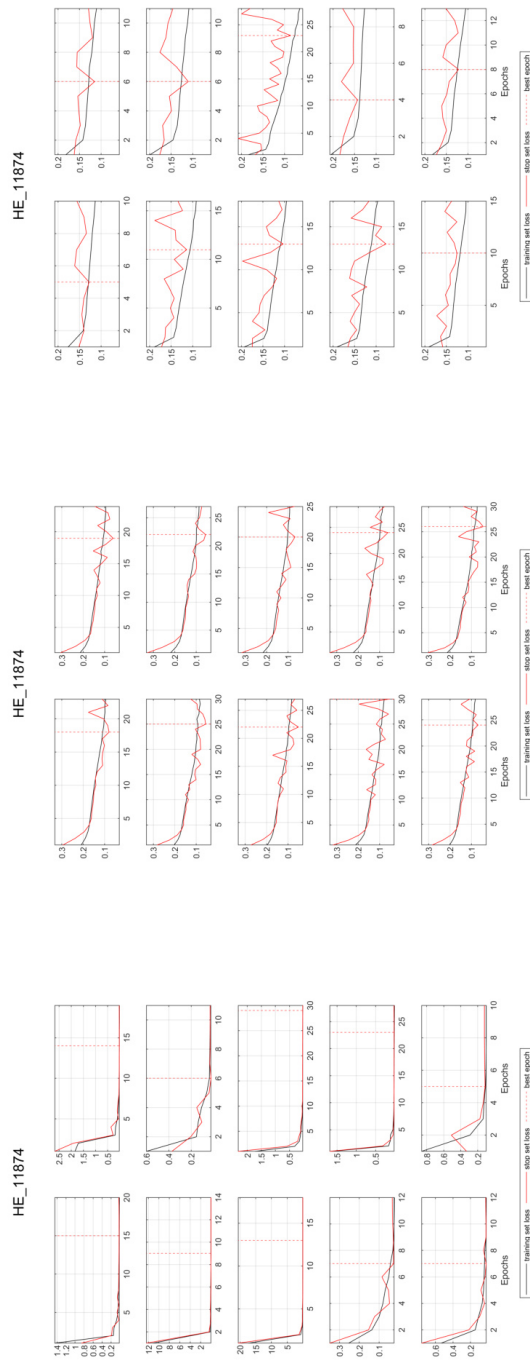

Figure S118: Seq2Seq training and early stopping loss (MSE) for all 10 model initializations for well HE\_11874: NARX (top), LSTM (middle), CNN (bottom)

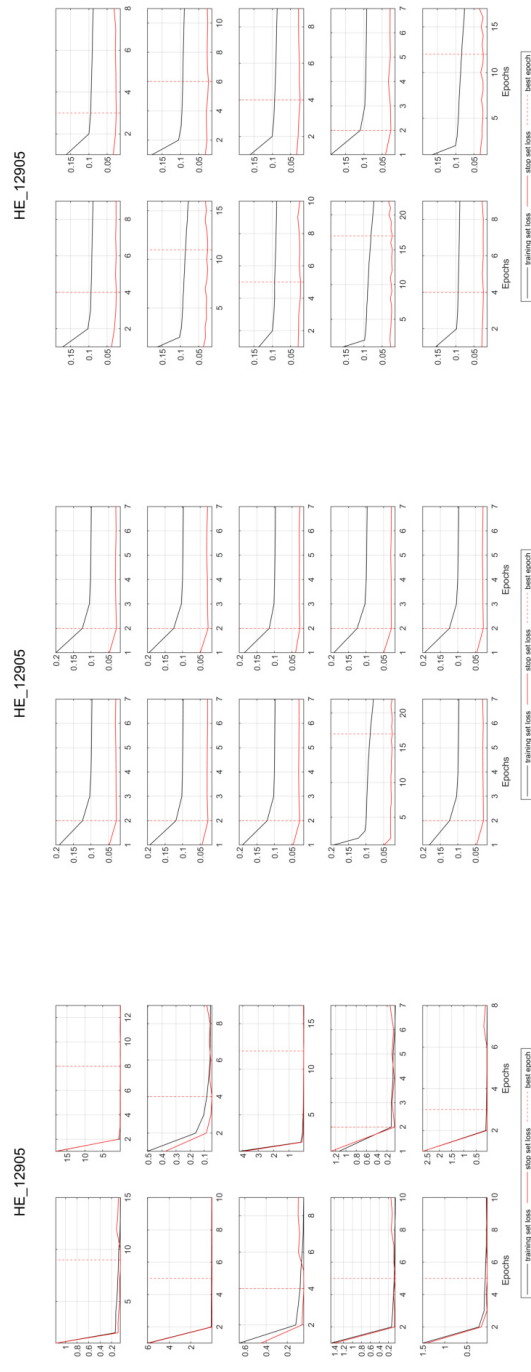

Figure S119: Seq2Seq training and early stopping loss (MSE) for all 10 model initializations for well HE\_12905: NARX (top), LSTM (middle), CNN (bottom)

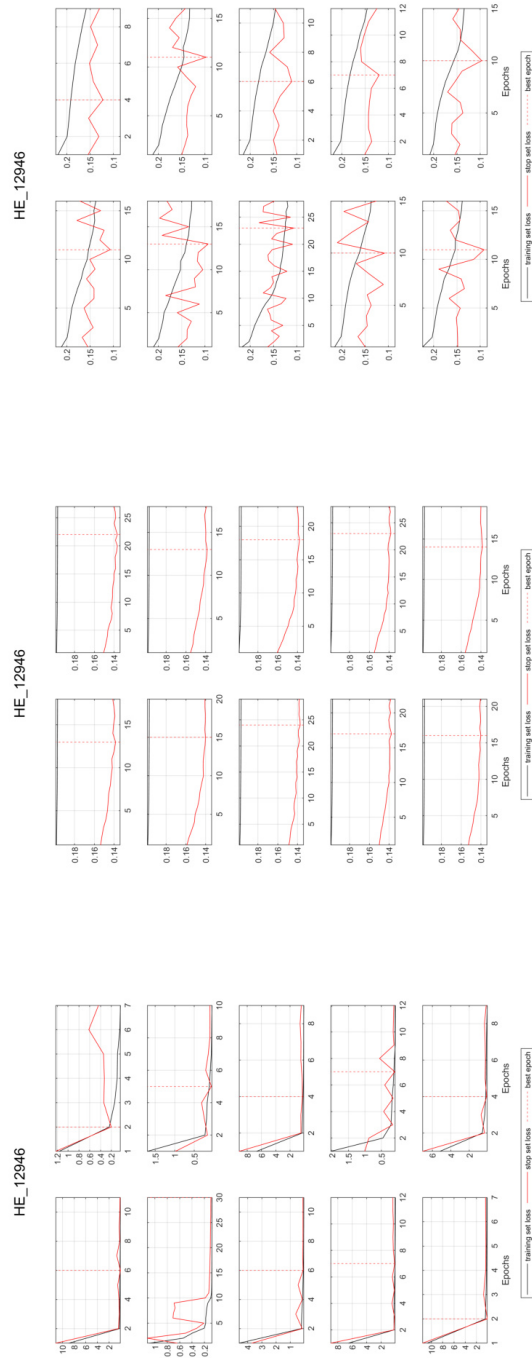

Figure S120: Seq2Seq training and early stopping loss (MSE) for all 10 model initializations for well HE\_12946: NARX (top), LSTM (middle), CNN (bottom)

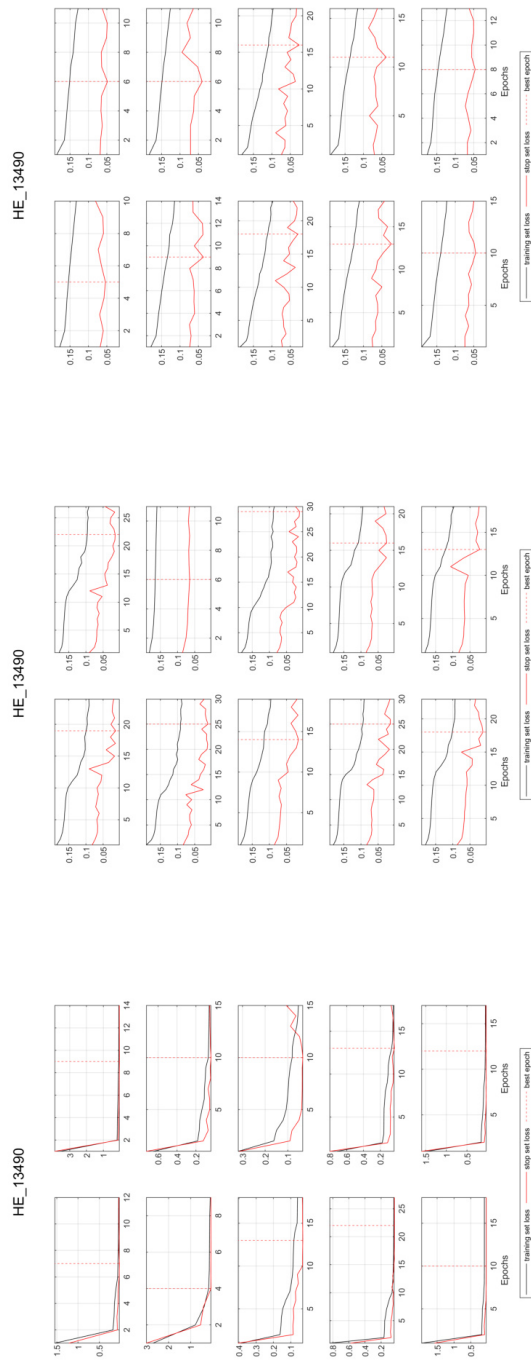

Figure S121: Seq2Seq training and early stopping loss (MSE) for all 10 model initializations for well HE\_13490: NARX (top), LSTM (middle), CNN (bottom)



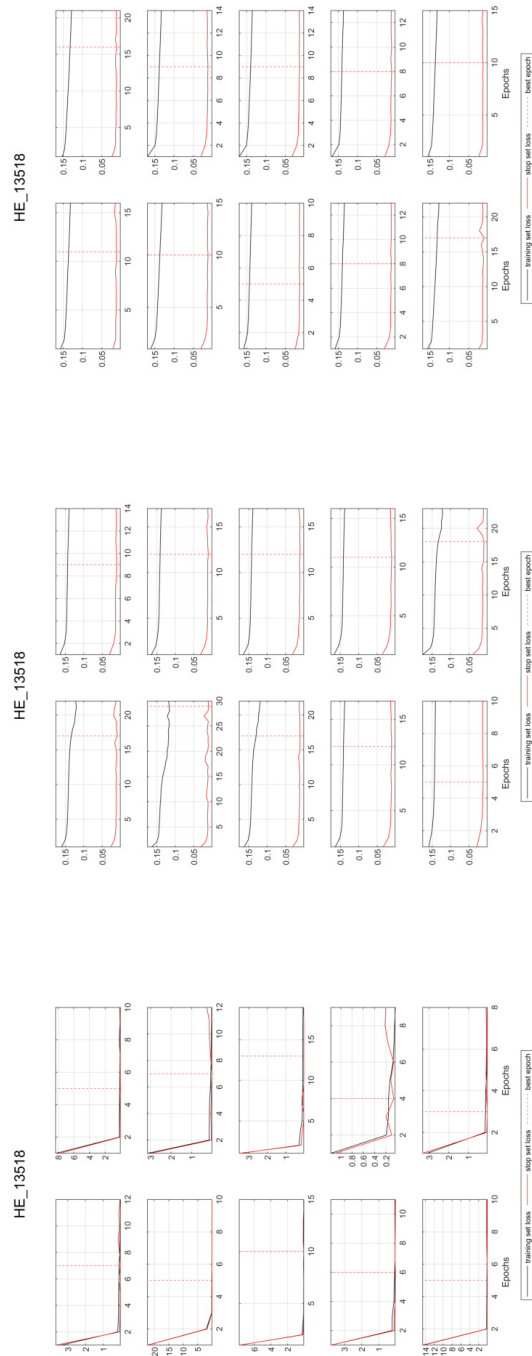

Figure S122: Seq2Seq training and early stopping loss (MSE) for all 10 model initializations for well HE\_13518: NARX (top), LSTM (middle), CNN (bottom)

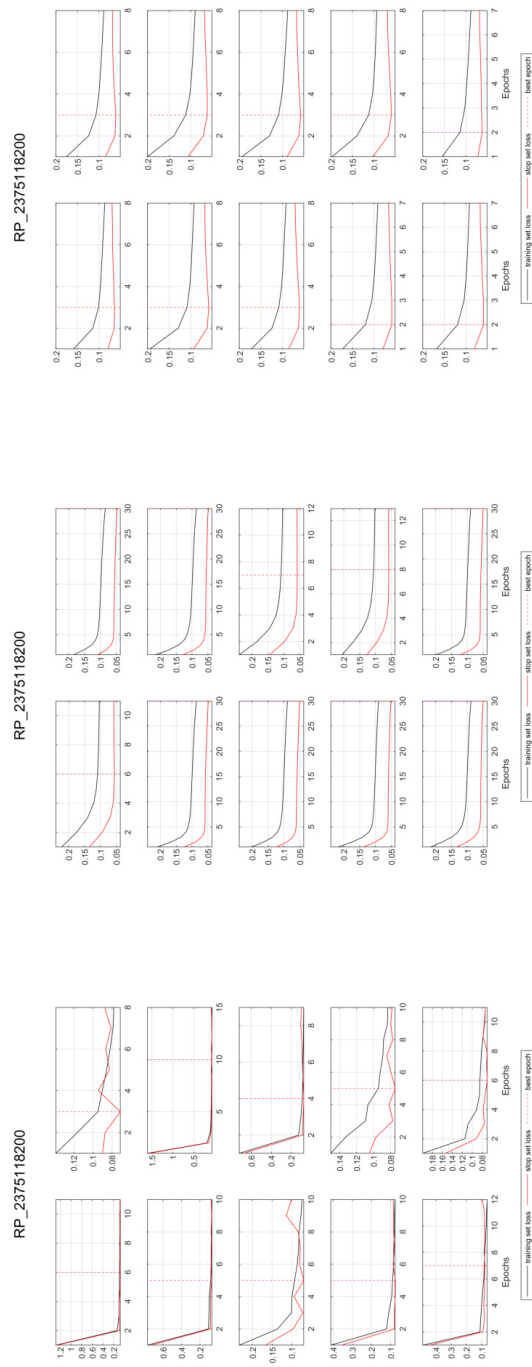

Figure S123: Seq2Seq training and early stopping loss (MSE) for all 10 model initializations for well RP\_2375118200: NARX (top), LSTM (middle), CNN (bottom)

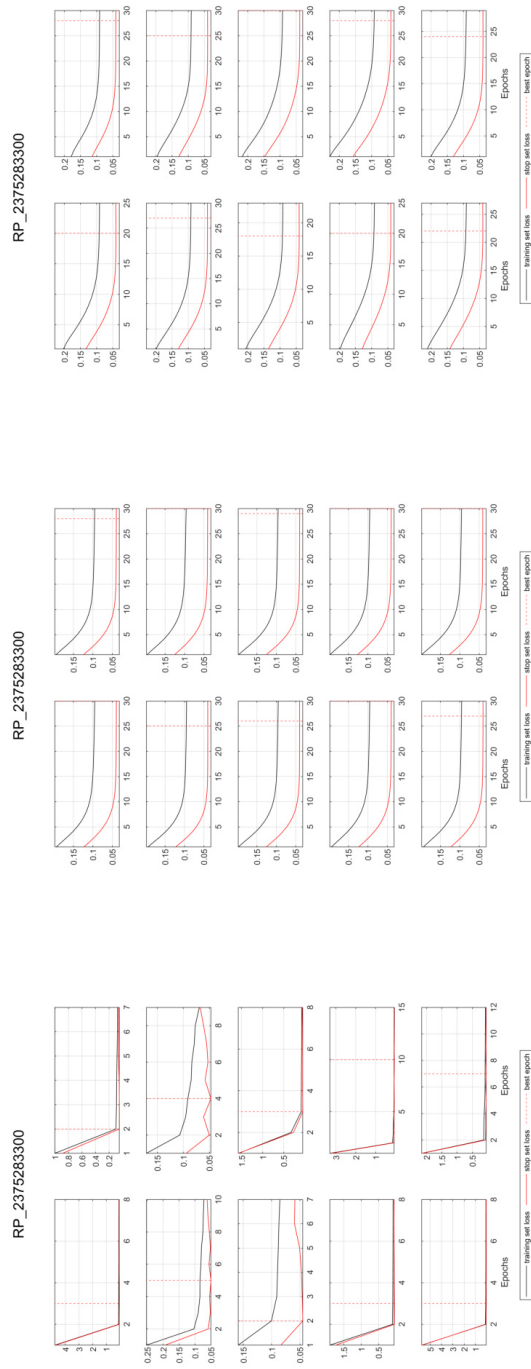

Figure S124: Seq2Seq training and early stopping loss (MSE) for all 10 model initializations for well RP\_2375283300: NARX (top), LSTM (middle), CNN (bottom)

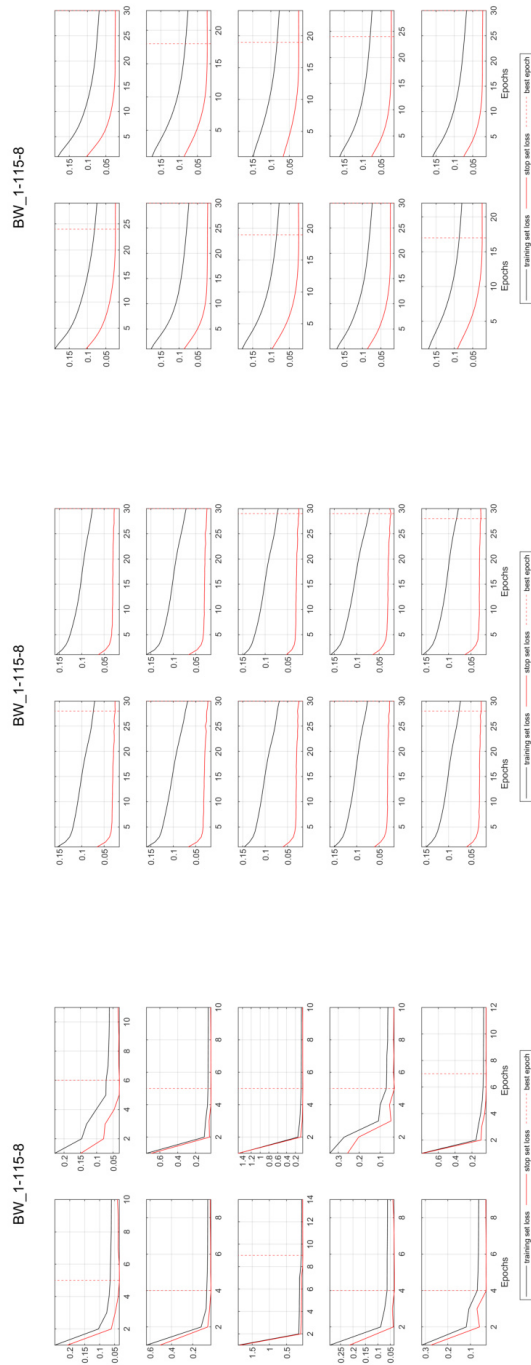

Figure S125: Seq2Seq  $\text{GWL}_{t-1}$  training and early stopping loss (MSE) for all 10 model initializations for well BW\_1-115-8: NARX (top), LSTM (middle), CNN (bottom)

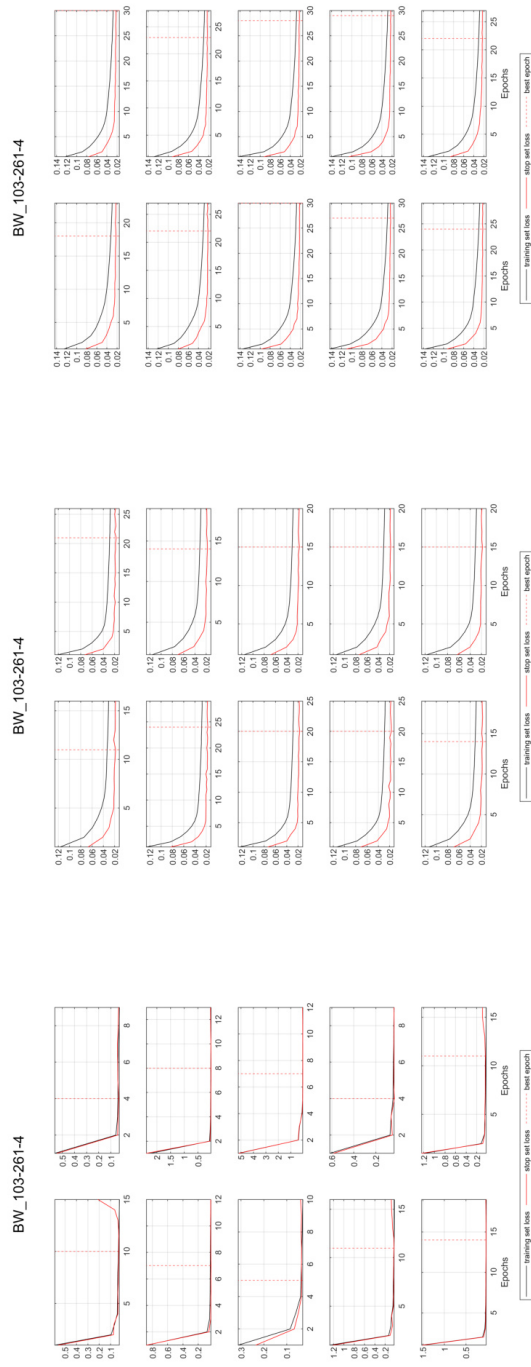

Figure S126: Seq2Seq  $GWL_{t-1}$  training and early stopping loss (MSE) for all 10 model initializations for well BW\_103-261-4: NARX (top), LSTM (middle), CNN (bottom)

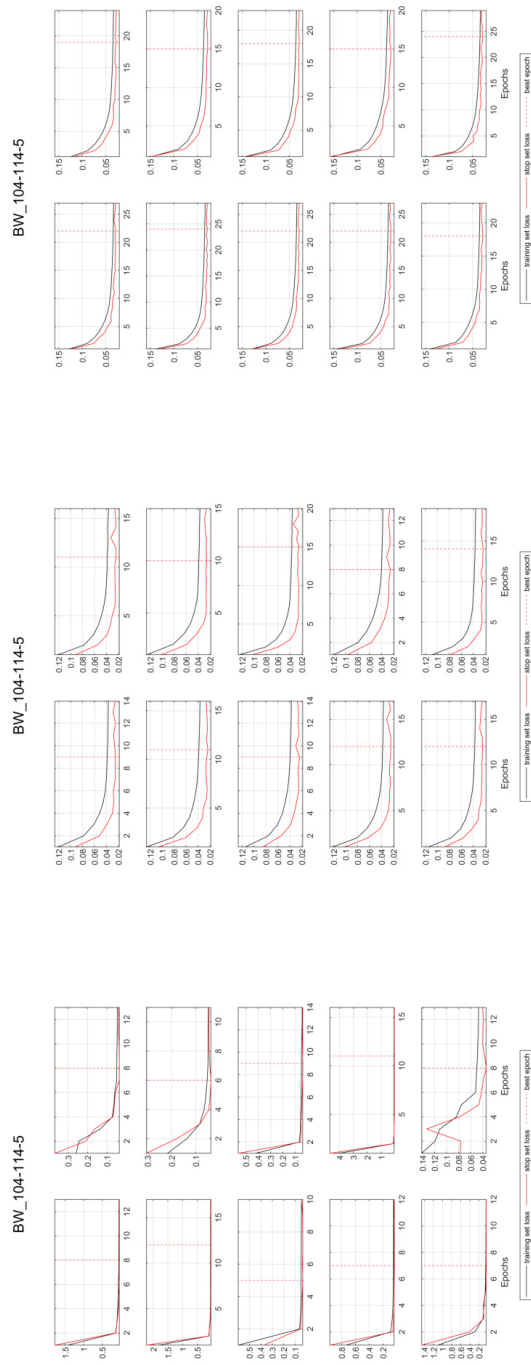

Figure S127: Seq2Seq  $\text{GWL}_{t-1}$  training and early stopping loss (MSE) for all 10 model initializations for well BW\_104-114-5: NARX (top), LSTM (middle), CNN (bottom)

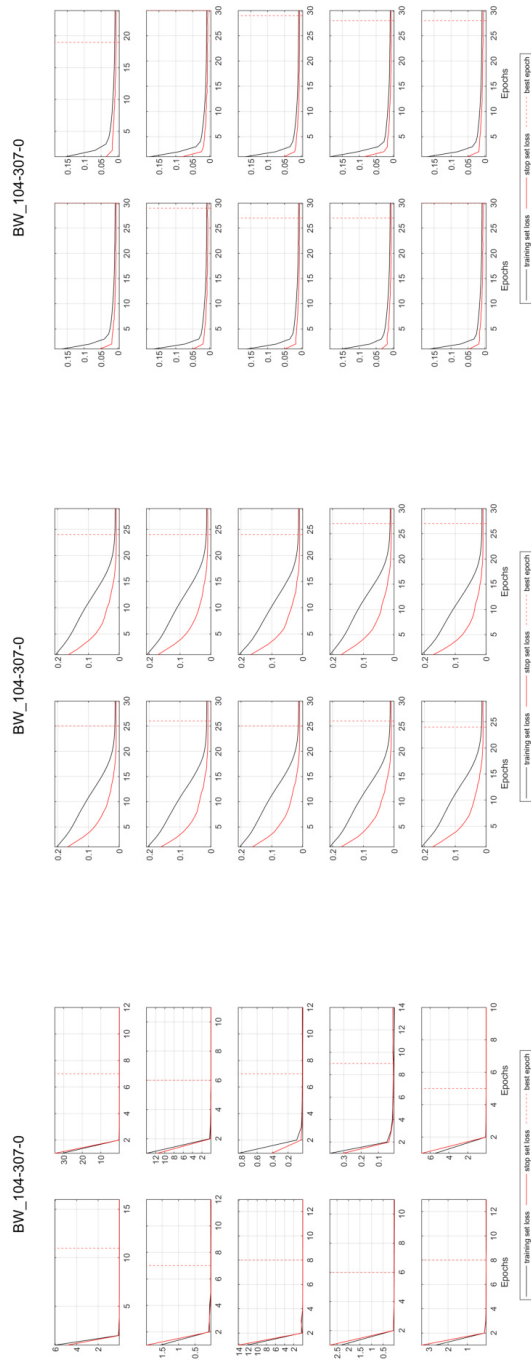

Figure S128: Seq2Seq  $GWL_{t-1}$  training and early stopping loss (MSE) for all 10 model initializations for well BW\_104-307-0: NARX (top), LSTM (middle), CNN (bottom)

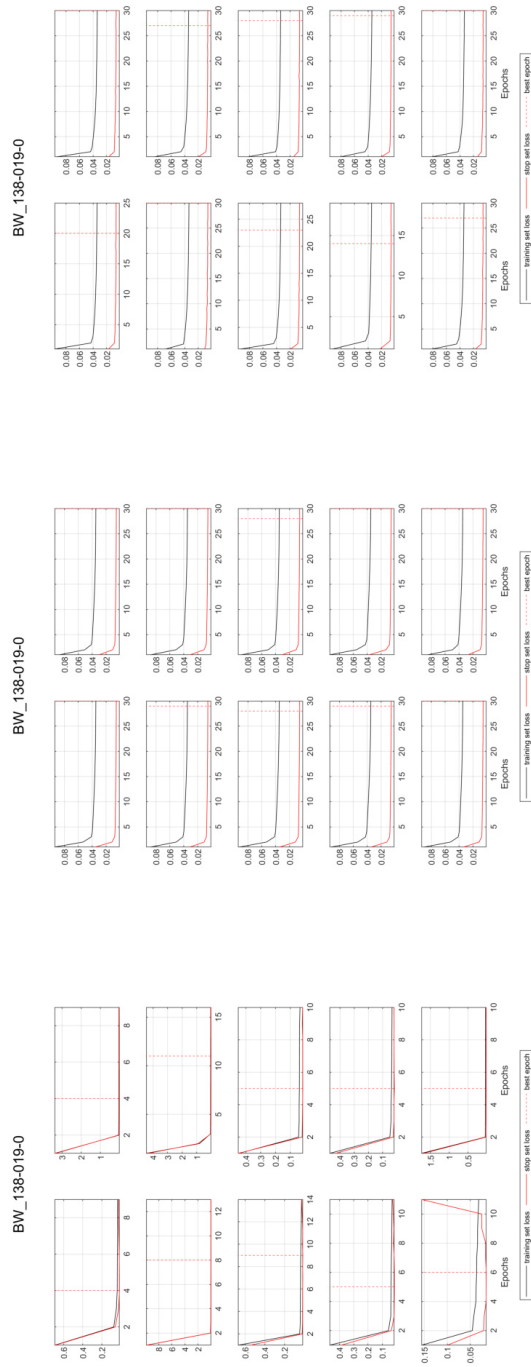

Figure S129: Seq2Seq  $GWL_{t-1}$  training and early stopping loss (MSE) for all 10 model initializations for well BW\_138-019-0: NARX (top), LSTM (middle), CNN (bottom)



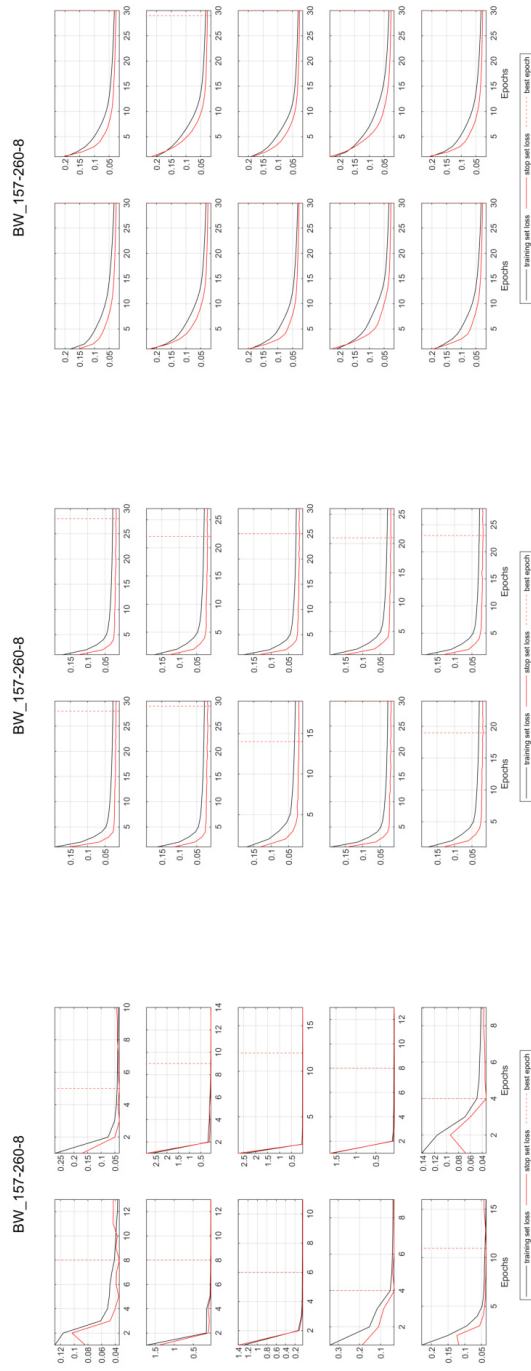

Figure S130: Seq2Seq  $\text{GWL}_{t-1}$  training and early stopping loss (MSE) for all 10 model initializations for well BW\_157-260-8: NARX (top), LSTM (middle), CNN (bottom)

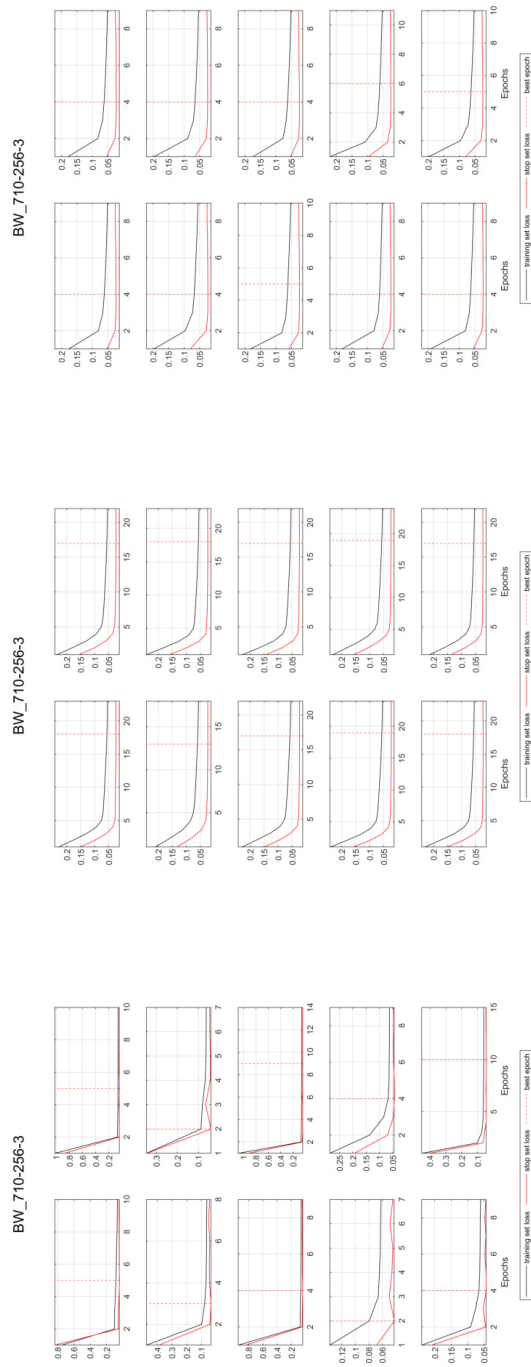

Figure S131: Seq2Seq  $GWL_{t-1}$  training and early stopping loss (MSE) for all 10 model initializations for well BW\_710-256-3: NARX (top), LSTM (middle), CNN (bottom)

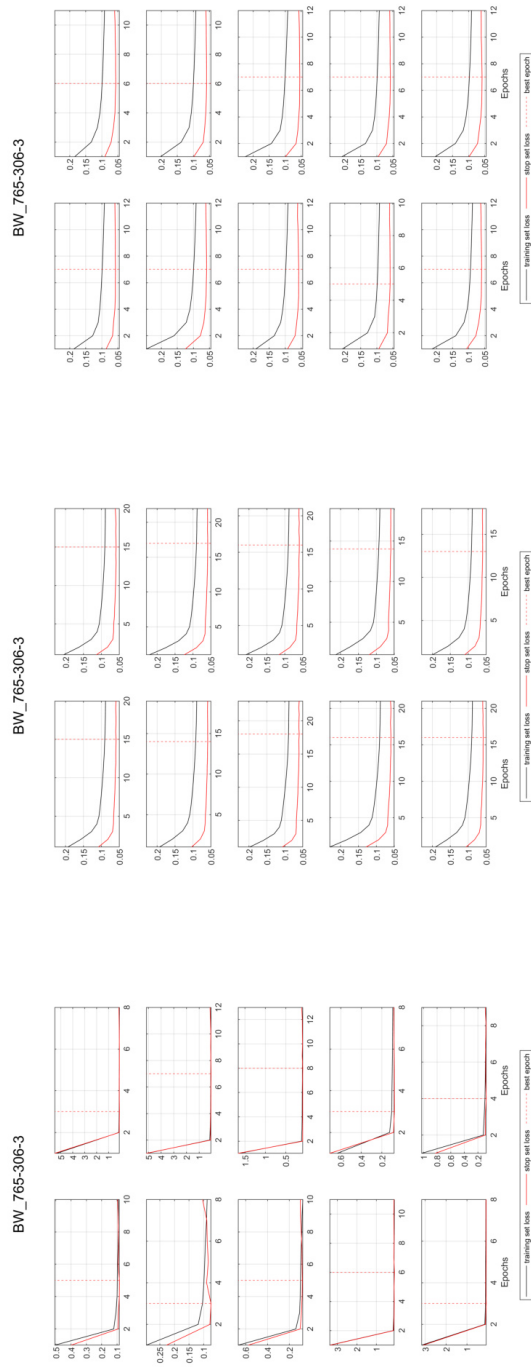

Figure S132: Seq2Seq  $GWL_{t-1}$  training and early stopping loss (MSE) for all 10 model initializations for well BW\_765-306-3: NARX (top), LSTM (middle), CNN (bottom)

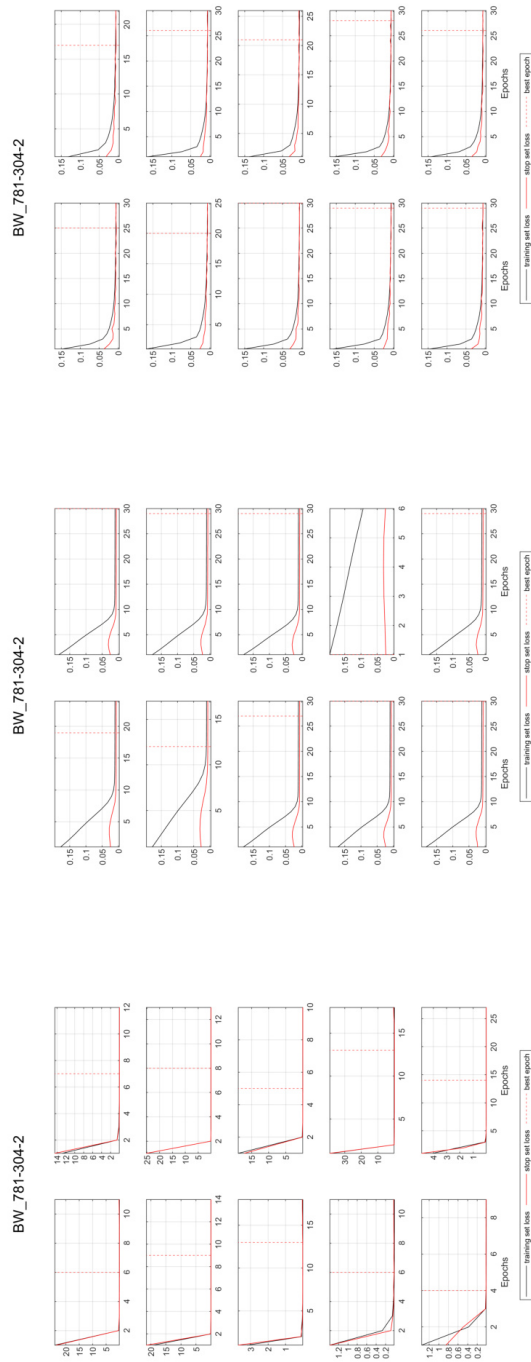

Figure S133: Seq2Seq  $GWL_{t-1}$  training and early stopping loss (MSE) for all 10 model initializations for well BW\_781-304-2: NARX (top), LSTM (middle), CNN (bottom)

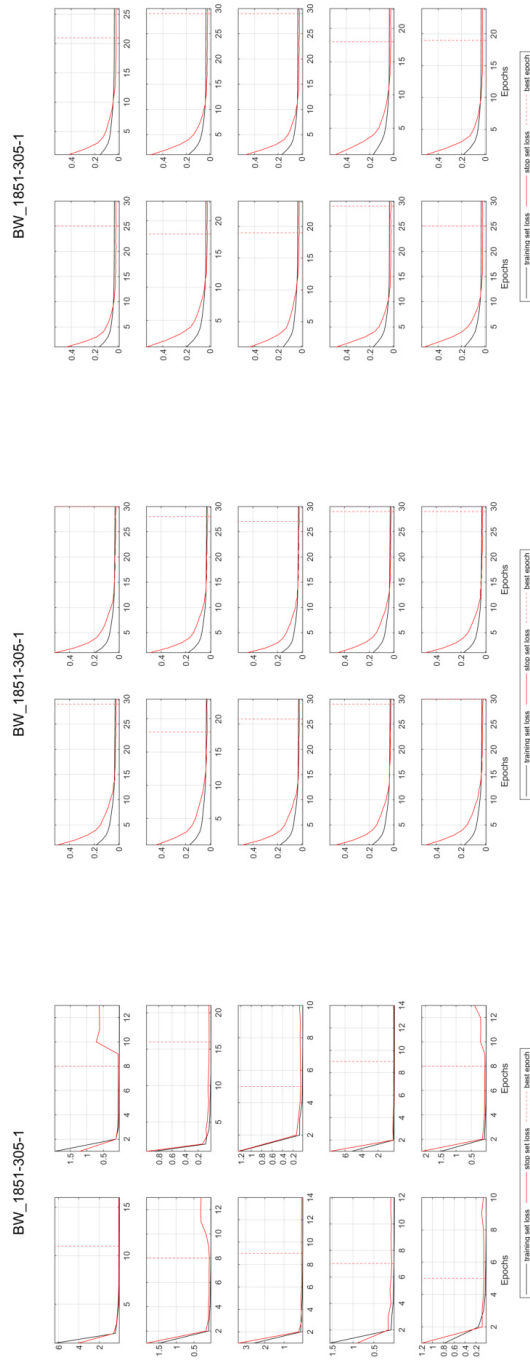

Figure S134: Seq2Seq  $GWL_{t-1}$  training and early stopping loss (MSE) for all 10 model initializations for well BW\_1851-305-1: NARX (top), LSTM (middle), CNN (bottom)

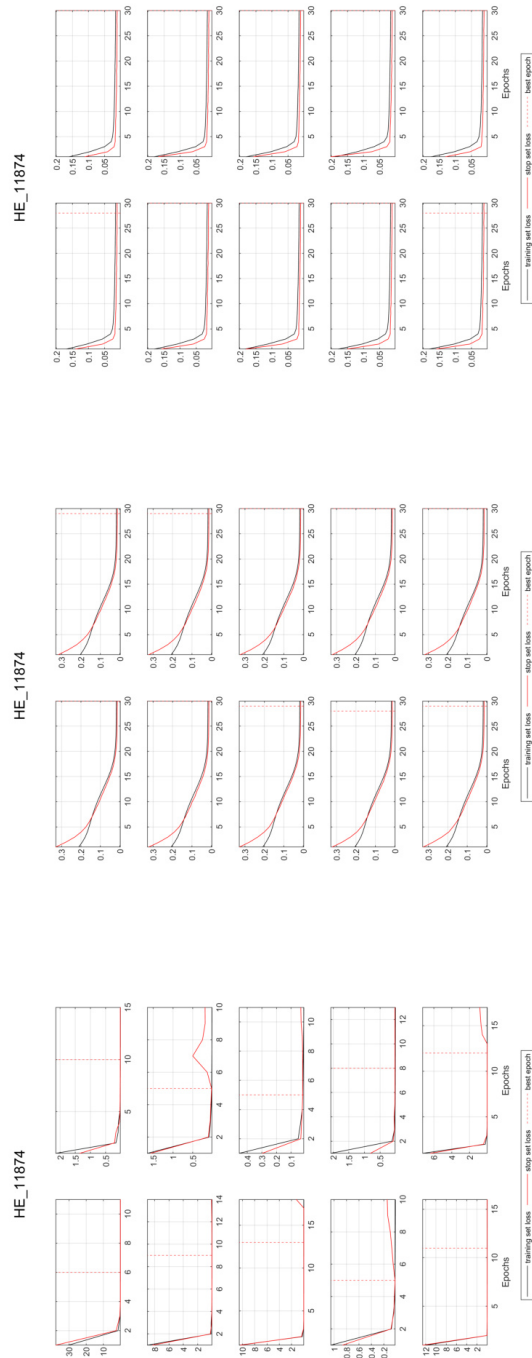

Figure S135: Seq2Seq  $\text{GWL}_{t-1}$  training and early stopping loss (MSE) for all 10 model initializations for well HE\_11874: NARX (top), LSTM (middle), CNN (bottom)

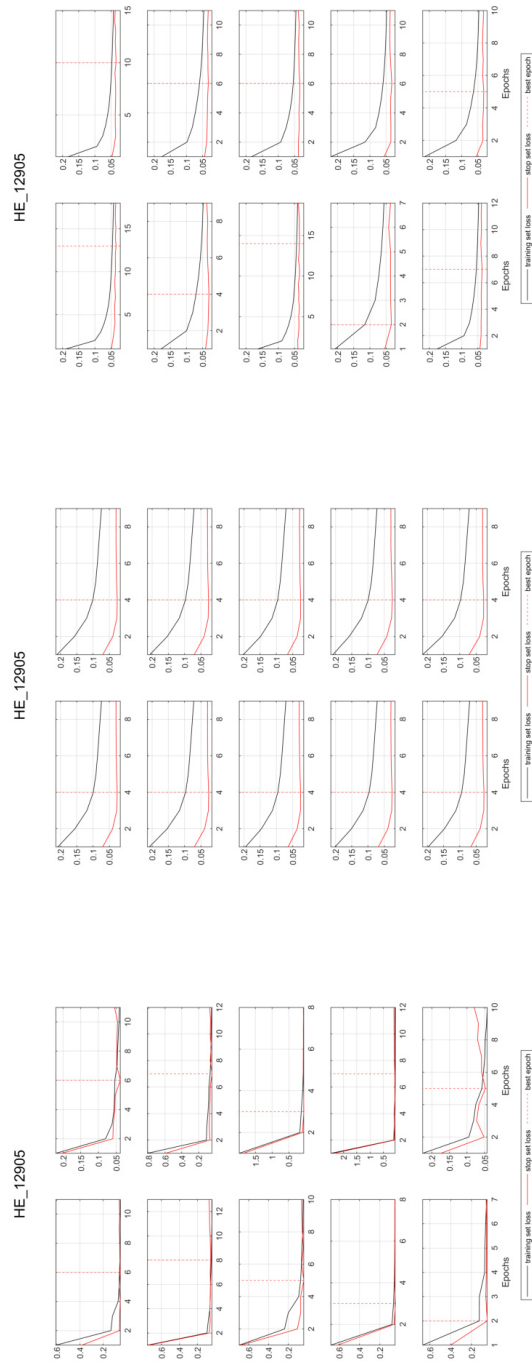

Figure S136: Seq2Seq  $GWL_{t-1}$  training and early stopping loss (MSE) for all 10 model initializations for well HE\_12905: NARX (top), LSTM (middle), CNN (bottom)

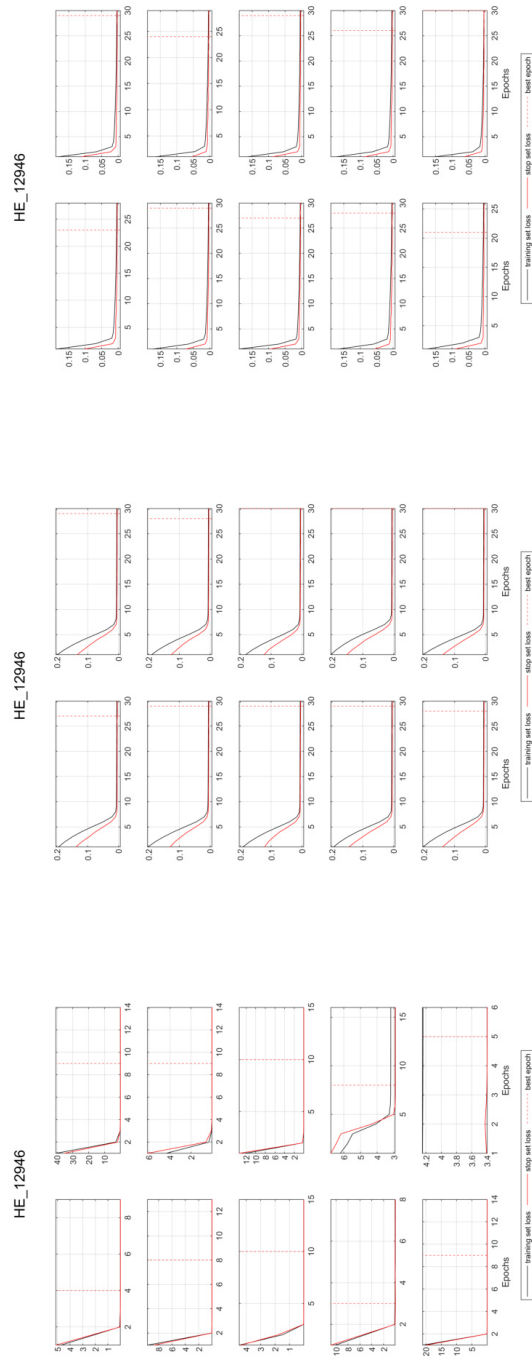

Figure S137: Seq2Seq  $\text{GWL}_{t-1}$  training and early stopping loss (MSE) for all 10 model initializations for well HE\_12946: NARX (top), LSTM (middle), CNN (bottom)



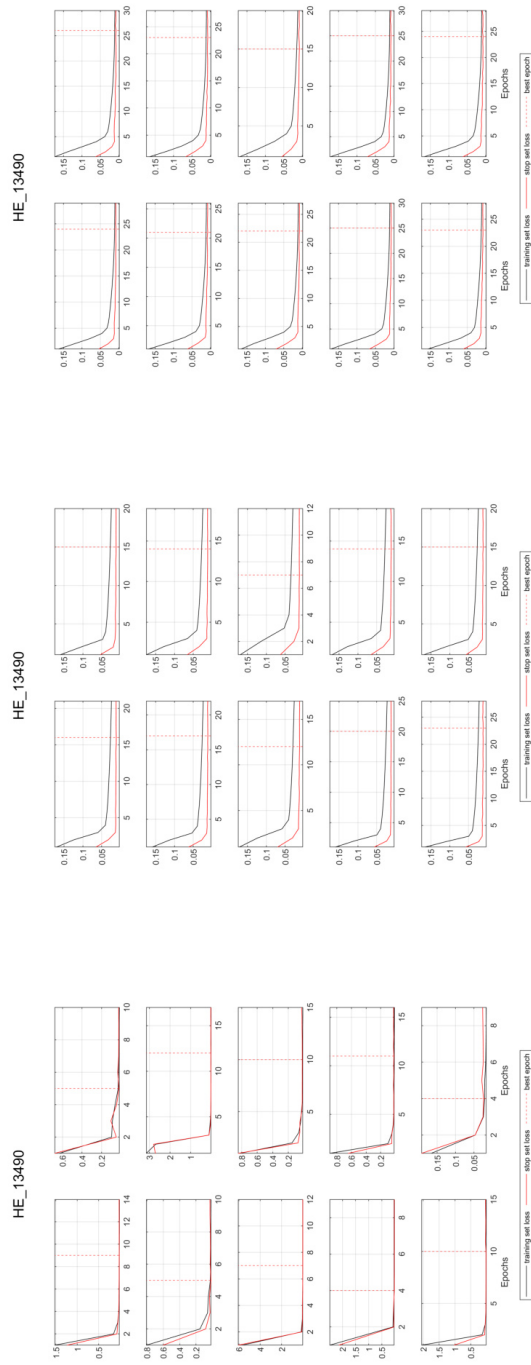

Figure S138: Seq2Seq  $\text{GWL}_{t-1}$  training and early stopping loss (MSE) for all 10 model initializations for well HE\_13490: NARX (top), LSTM (middle), CNN (bottom)

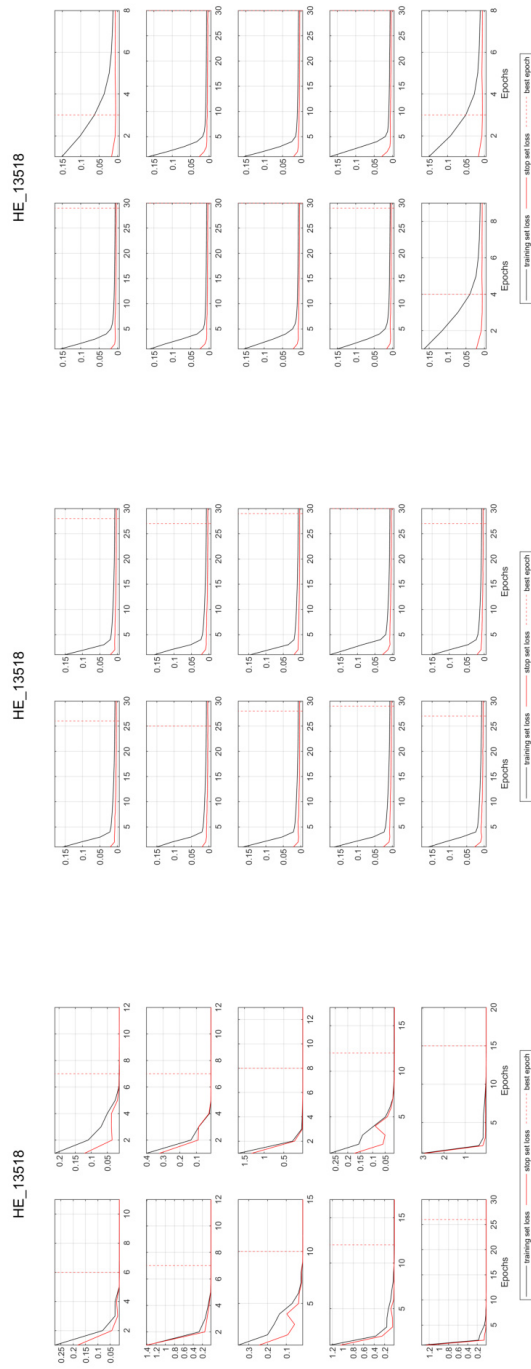

Figure S139: Seq2Seq  $GWL_{t-1}$  training and early stopping loss (MSE) for all 10 model initializations for well HE\_13518: NARX (top), LSTM (middle), CNN (bottom)

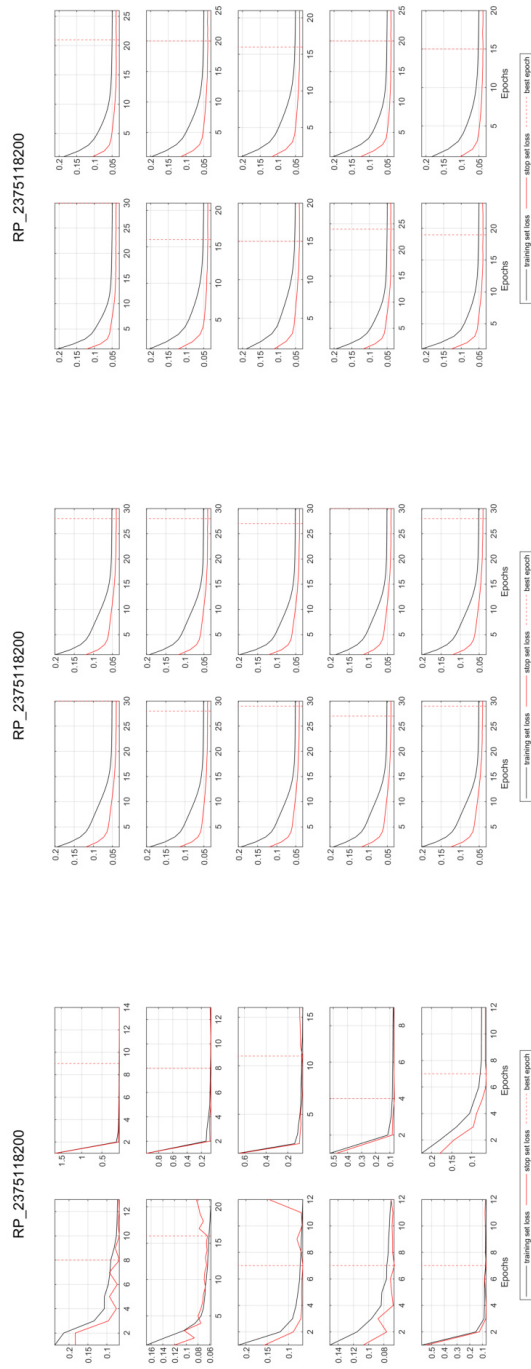

Figure S140: Seq2Seq  $GWL_{t-1}$  training and early stopping loss (MSE) for all 10 model initializations for well RP\_2375118200: NARX (top), LSTM (middle), CNN (bottom)

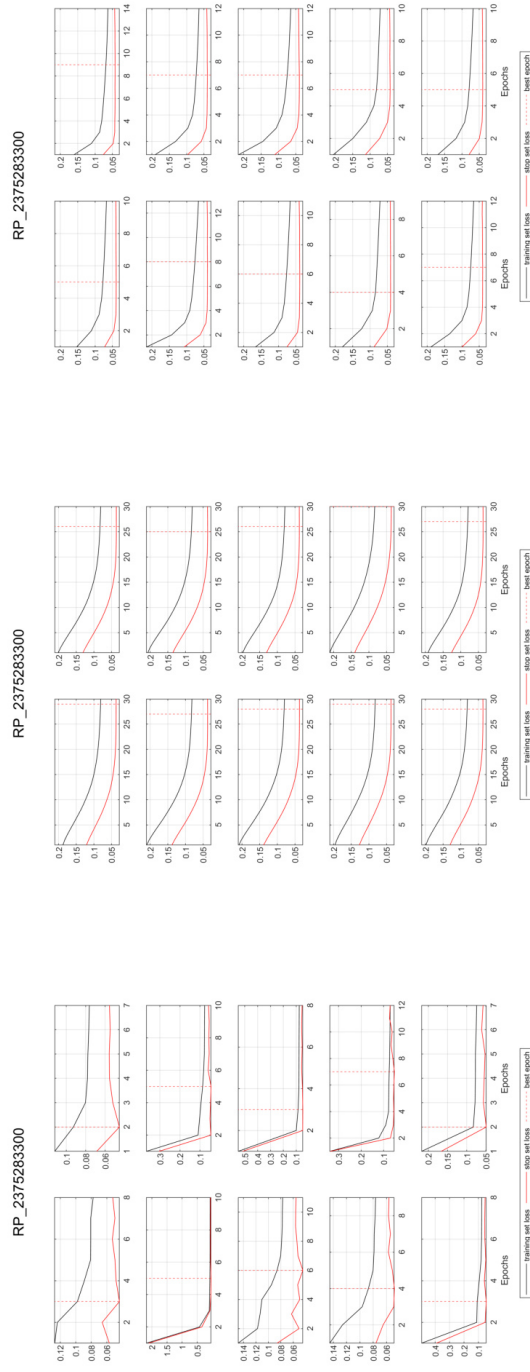

Figure S141: Seq2Seq  $GWL_{t-1}$  training and early stopping loss (MSE) for all 10 model initializations for well RP\_2375283300: NARX (top), LSTM (middle), CNN (bottom)
